# Supplementary material for: Bridging Lewis acidic antimony centers with electron-withdrawing carborane cages
Source: Royal Society of Chemistry journal article supplement (doi:10.1039/d6sc00316h), 2026-04-09
Supplement: d6sc00316h1.pdf [file d6sc00316h1.pdf]

Supporting Information:

**Bridging Antimony Centers with Electron-Withdrawing Carborane Cages**

Victoria P. Rubio,<sup>a</sup> McKinley H. Durham,<sup>a</sup> Matthew Scurria,<sup>a</sup> Tyler A. Kerr,<sup>a</sup> Osvaldo Gutierrez,<sup>\*,a</sup> and Alexander M. Spokoyny<sup>\*,a,b</sup>

<sup>a</sup> Department of Chemistry and Biochemistry, University of California, Los Angeles, 607 Charles E. Young Drive East, Los Angeles, CA 90095, USA

<sup>b</sup> California NanoSystems Institute (CNSI), University of California, Los Angeles, CA 90095, USA

\*To whom correspondence should be addressed: o.gutierrez@g.ucla.edu, spokoyny@ucla.edu

## Table of Contents

### I. General Considerations and Synthetic Procedures/Characterization

|                                                                                                                                                                                                             |           |
|-------------------------------------------------------------------------------------------------------------------------------------------------------------------------------------------------------------|-----------|
| i. General Considerations.....                                                                                                                                                                              | S3        |
| ii. Experimental.....                                                                                                                                                                                       | S4-S28    |
| Synthesis of 1,2-(SbPh) <sub>2</sub> - <i>ortho</i> -(C <sub>2</sub> B <sub>10</sub> H <sub>10</sub> ) <sub>2</sub> [ <b>1a</b> ].....                                                                      | S4-S6     |
| Synthesis of 1,2-(SbPh <sub>2</sub> ) <sub>2</sub> - <i>ortho</i> -(C <sub>2</sub> B <sub>10</sub> H <sub>10</sub> ) [ <b>2a</b> ].....                                                                     | S7-S9     |
| Synthesis of <i>o</i> -(C <sub>2</sub> B <sub>10</sub> H <sub>10</sub> ) <sub>2</sub> (SbPh(diolate)) <sub>2</sub> [ <b>1b</b> ].....                                                                       | S10-S12   |
| Synthesis of <i>o</i> -(C <sub>2</sub> B <sub>10</sub> H <sub>10</sub> )(SbPh <sub>2</sub> (diolate)) <sub>2</sub> [ <b>2b</b> ].....                                                                       | S13-S15   |
| Synthesis of [Et <sub>3</sub> PO][ <i>o</i> -(C <sub>2</sub> B <sub>10</sub> H <sub>10</sub> ) <sub>2</sub> (SbPh <sub>2</sub> (diolate)) <sub>2</sub> ] [ <b>1c</b> ].....                                 | S16-S18   |
| Synthesis of [Et <sub>3</sub> PO][ <i>o</i> -(C <sub>2</sub> B <sub>10</sub> H <sub>10</sub> )(SbPh <sub>4</sub> (diolate)) <sub>2</sub> ] [ <b>2c</b> ].....                                               | S19-S21   |
| Synthesis of [ <sup>n</sup> Bu <sub>4</sub> N][μ <sup>2</sup> -F][ <i>o</i> -(C <sub>2</sub> B <sub>10</sub> H <sub>10</sub> ) <sub>2</sub> (SbPh <sub>2</sub> (diolate)) <sub>2</sub> ] [ <b>1d</b> ]..... | S22-S24   |
| Synthesis of [ <sup>n</sup> Bu <sub>4</sub> N][μ <sup>2</sup> -F][ <i>o</i> -(C <sub>2</sub> B <sub>10</sub> H <sub>10</sub> )(SbPh <sub>4</sub> (diolate)) <sub>2</sub> ] [ <b>2d</b> ].....               | S25-S27   |
| Synthesis of <i>o</i> -(C <sub>2</sub> B <sub>10</sub> H <sub>10</sub> )(SbPh <sub>2</sub> Cl) <sub>2</sub> O [ <b>1e</b> ].....                                                                            | S28-S30   |
| II. Variable Temperature NMR of 2a.....                                                                                                                                                                     | S31       |
| III. Gutmann Beckett Method Titration of 1b.....                                                                                                                                                            | S31       |
| IV. Hydrogenation with Stiborane Catalyst.....                                                                                                                                                              | S32-S33   |
| V. Optimized Structures and Computational Details.....                                                                                                                                                      | S33-S112  |
| VI. X-Ray Crystallographic Details.....                                                                                                                                                                     | S113-S142 |
| VII. References.....                                                                                                                                                                                        | S143-S145 |

## I. General Information and Synthetic Procedures/Characterization

### i. General Consideration

Anhydrous manipulations and sample preparation were performed in an inert atmosphere of N<sub>2</sub> using glovebox. Anhydrous solvents were obtained through a Grubb's-type column. All other manipulations were performed in unpurified solvents unless otherwise stated. All commercially available chemicals were used as received. Diphenylantimony chloride (SbPh<sub>2</sub>Cl) and dichlorophenylstibane (SbPhCl<sub>2</sub>) were synthesized following previous procedures.<sup>1</sup> Tetrachloro-*o*-benzoquinone (*o*-chloranil) was purified from its protonated form via recrystallization in cyclohexane. *ortho*-Carborane was obtained from Boron Specialties. SbCl<sub>3</sub> and *o*-carborane were purified separately by sublimation at 90°C and transferred into the glovebox. Deuterated solvents were obtained from Cambridge Isotope Laboratories. NMR spectra were acquired on Bruker NEO 600 (supported by NIH S10OD028644 to UCLA) or Bruker 400 spectrometers and processed with MestReNova. <sup>1</sup>H, <sup>13</sup>C{<sup>1</sup>H}, <sup>11</sup>B, and <sup>11</sup>B{<sup>1</sup>H} NMR data were collected at room temperature with the spectrometer locked to the <sup>2</sup>H signal of the stated solvent and are referenced to the residual <sup>1</sup>H and <sup>13</sup>C resonances of that solvent. Chemical shifts (δ) are reported in ppm and coupling constants (J) in Hz; multiplicities are given as s, d, t, q, m, br.

## ii. Experimental

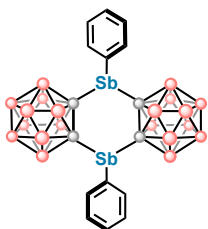

### Synthesis of 1,2-(SbPh)<sub>2</sub>-*ortho*-(C<sub>2</sub>B<sub>10</sub>H<sub>10</sub>)<sub>2</sub> [1a]

In an N<sub>2</sub>-filled glovebox, *o*-carborane (300 mg, 2.08 mmol) was dissolved in toluene followed by the dropwise addition of 2 equiv. of *n*-BuLi (2.5 M in hexanes, 1.66 mL, 4.16 mmol) to the stirred solution, resulting in the immediate precipitation of the dilithiated cage, Li<sub>2</sub>C<sub>2</sub>B<sub>10</sub>H<sub>10</sub>. After stirring for 4 hours, the white solid was collected by filtration, washed thoroughly with toluene, and resuspended in dichloromethane. The resulting suspension was transferred dropwise into a solution of SbCl<sub>2</sub>Ph (2.0 equiv.) in dichloromethane and heated at 40 °C in a sealed vial. The mixture was allowed to stir for 12 hours before being passed through a pad of celite. Removal of volatiles under reduced pressure afforded a pale white residue, which was purified by three recrystallizations from hot benzene to give **1a** as a white crystalline solid (63% yield).

<sup>1</sup>H NMR (600 MHz, C<sub>6</sub>D<sub>6</sub>, 25 °C): δ (ppm). 2.66 (m, 20H), 7.09 (m, 6H), 7.45 (d, 4H).

<sup>13</sup>C{<sup>1</sup>H} NMR (150 MHz, CDCl<sub>3</sub>, 25 °C): δ (ppm). 135.32, 130.01, 128.37.

<sup>11</sup>B NMR (192 MHz, CDCl<sub>3</sub>, 25 °C): δ (ppm). -13.75 (d, 2B), -8.20 (d, 9B), 2.77 (d, 5B), -2.14 (d, 4B).

<sup>11</sup>B{<sup>1</sup>H} NMR (192 MHz, CDCl<sub>3</sub>, 25 °C): δ (ppm). -13.80, -9.37, -7.30, -3.00, 1.67.

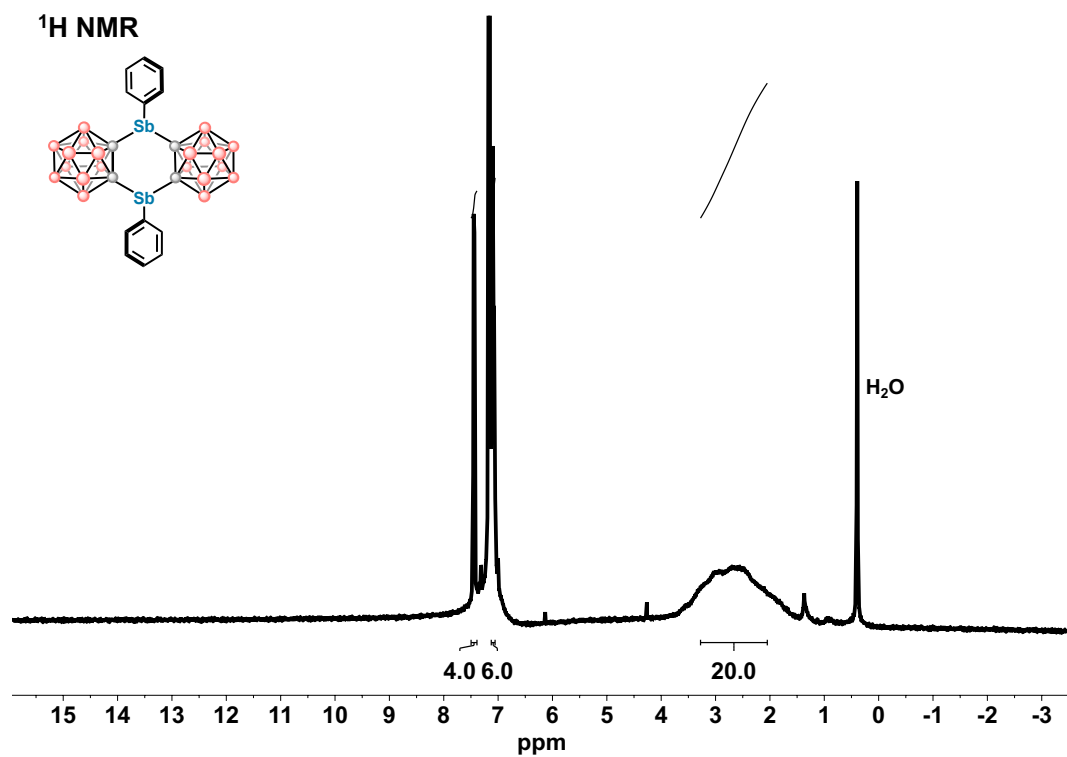

**Figure S1** <sup>1</sup>H NMR spectrum of [1a] in CDCl<sub>3</sub>

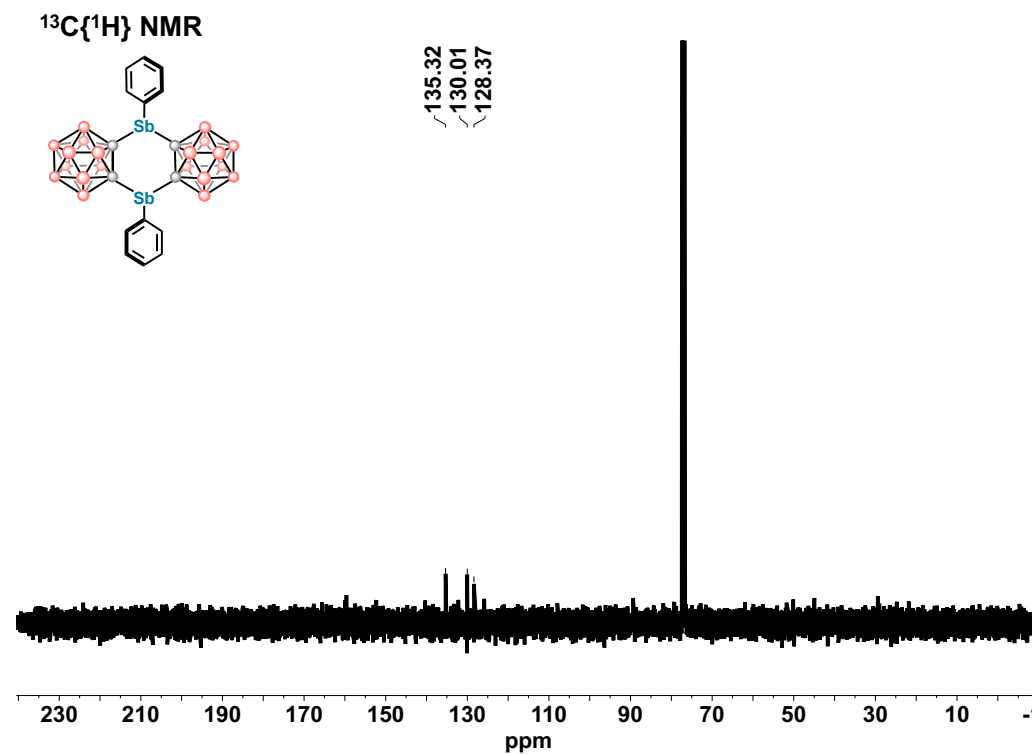

**Figure S2** <sup>13</sup>C{<sup>1</sup>H} NMR spectrum of [1a] in CDCl<sub>3</sub>

**$^{11}\text{B}$  NMR**

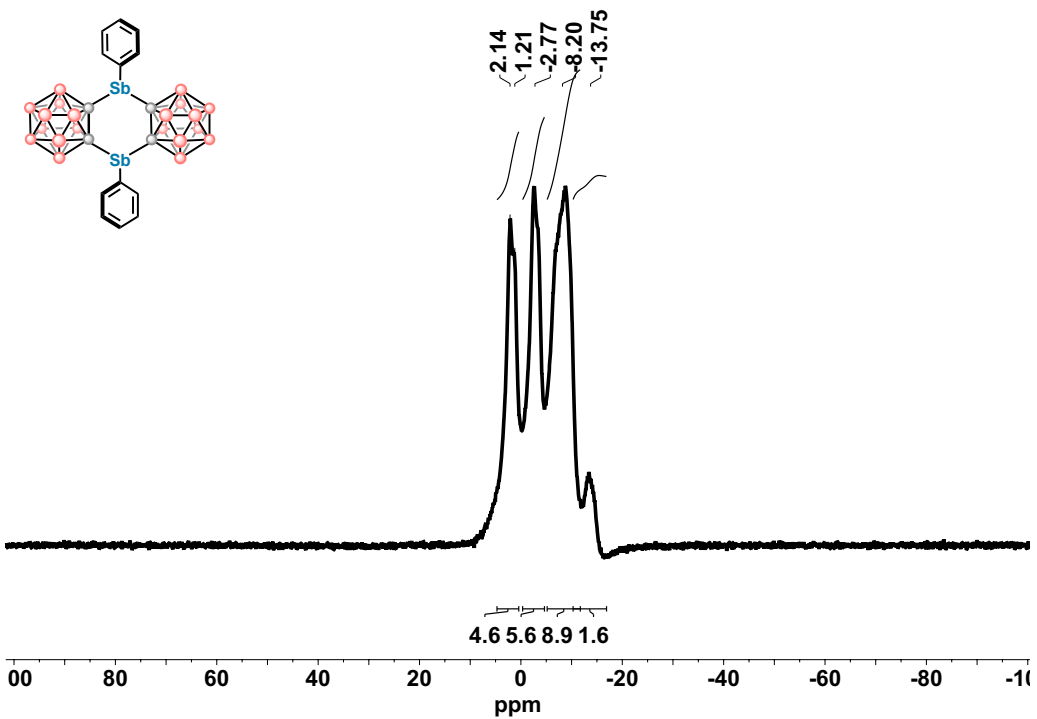

**Figure S3**  $^{11}\text{B}$  NMR spectrum of [1a] in  $\text{CDCl}_3$

**$^{11}\text{B}\{^1\text{H}\}$  NMR**

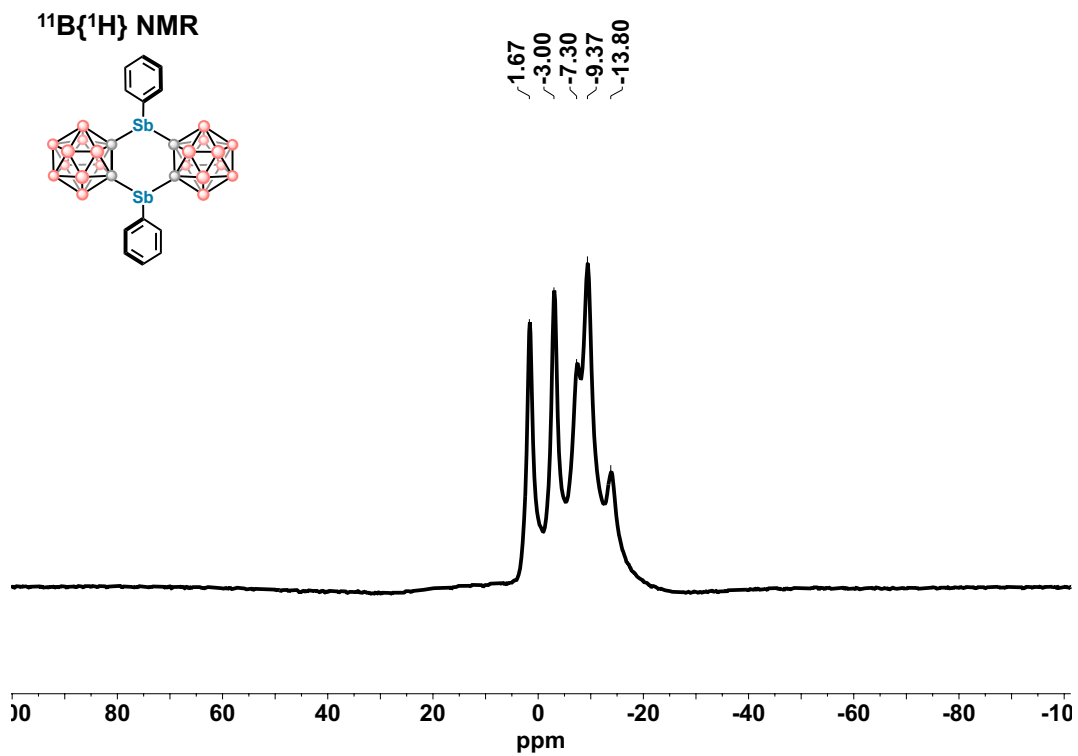

**Figure S4**  $^{11}\text{B}\{^1\text{H}\}$  NMR spectrum of [1a] in  $\text{CDCl}_3$

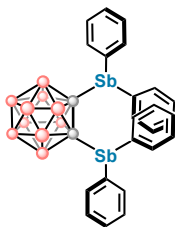

### Synthesis of 1,2-(SbPh<sub>2</sub>)<sub>2</sub>-*ortho*-(C<sub>2</sub>B<sub>10</sub>H<sub>10</sub>) **2a**

In an N<sub>2</sub>-filled glovebox, *o*-carborane (300 mg, 2.08 mmol) was dissolved in toluene followed by the dropwise addition of 2 equiv. of *n*-BuLi (2.5 M in hexanes, 1.66 mL, 4.16 mmol) to the stirred solution, resulting in the immediate precipitation of the dilithiated cage, Li<sub>2</sub>C<sub>2</sub>B<sub>10</sub>H<sub>10</sub>. After stirring for 4 hours, the white solid was collected by filtration, washed thoroughly with toluene, and resuspended in dichloromethane. The resulting suspension was transferred dropwise into a solution of SbClPh<sub>2</sub> (2 equiv., 1.20 g, 3.84 mmol) in dichloromethane/THF mixture and stirred at 40 °C in a sealed vial. The mixture was allowed to stir for 12 hours before being passed through a pad of celite. Removal of volatiles under reduced pressure afforded a pale white residue, which was purified by three recrystallizations from hot dry benzene to give **1a** as a white crystalline solid (86% yield).

<sup>1</sup>H NMR (600 MHz, C<sub>6</sub>D<sub>6</sub>, 25 °C): δ (ppm) 2.79 (m, 10H), 7.09 (m, 12H), 7.57 (m, 8H)

<sup>13</sup>C{<sup>1</sup>H} NMR (150 MHz, CDCl<sub>3</sub>, 25 °C): δ (ppm). 138.61, 137.72, 130.27, 129.19, 68.09.

<sup>11</sup>B NMR (192 MHz, CDCl<sub>3</sub>, 25 °C): δ (ppm). 2.07 (d, 2B), -4.11 (d, 2B), -8.30(d, 6B).

<sup>11</sup>B{<sup>1</sup>H} NMR (192 MHz, CDCl<sub>3</sub>, 25 °C): δ (ppm). 1.67, -4.55, -8.75, -10.13.

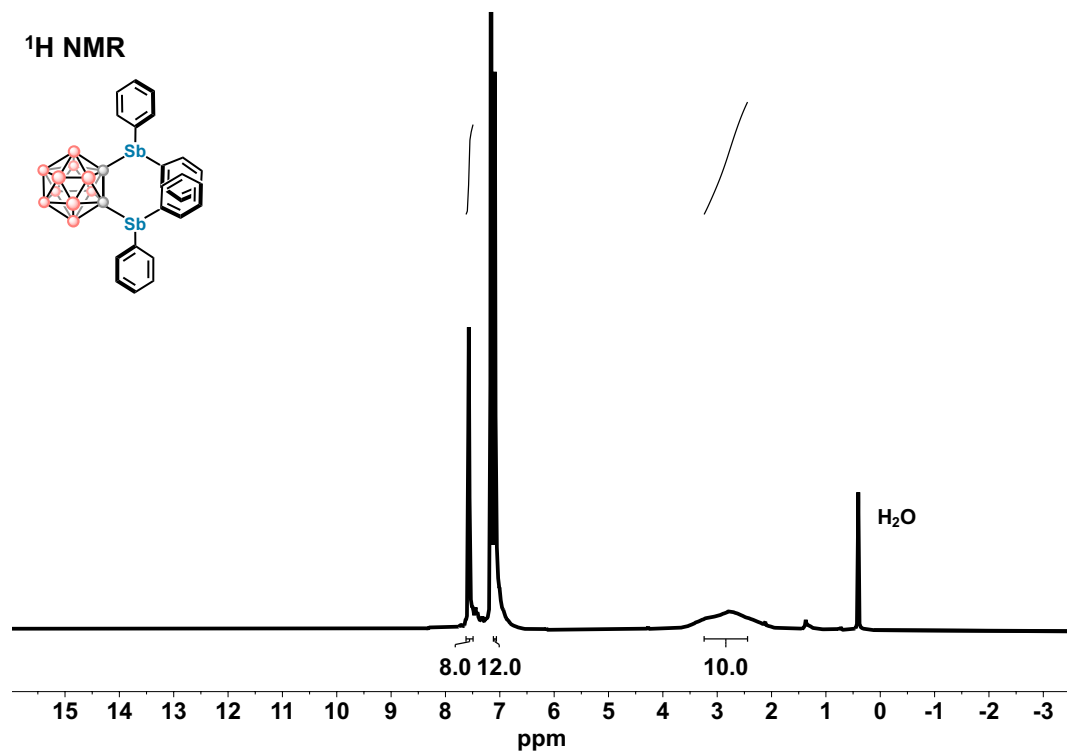

**Figure S5**  $^1\text{H}$  NMR spectrum of **[2a]** in  $\text{C}_6\text{D}_6$

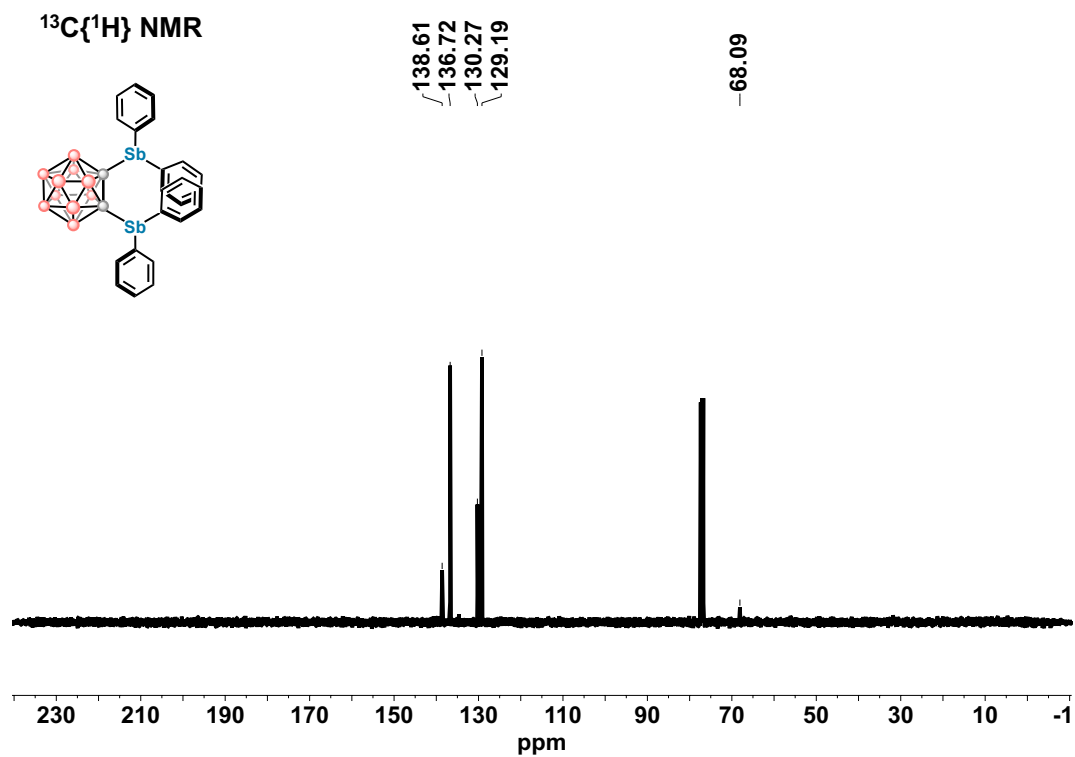

**Figure S6**  $^{13}\text{C}\{^1\text{H}\}$  NMR spectrum of **[2a]** in  $\text{C}_6\text{D}_6$

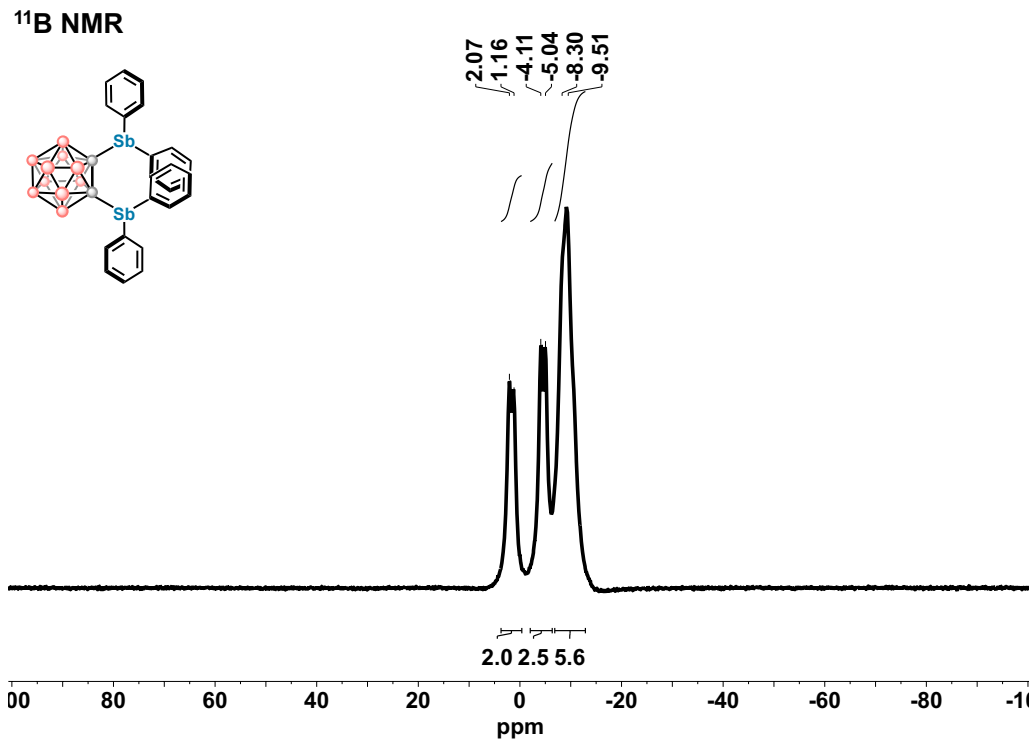

**Figure S7**  $^{11}\text{B}$  NMR spectrum of [2a] in  $\text{C}_6\text{D}_6$

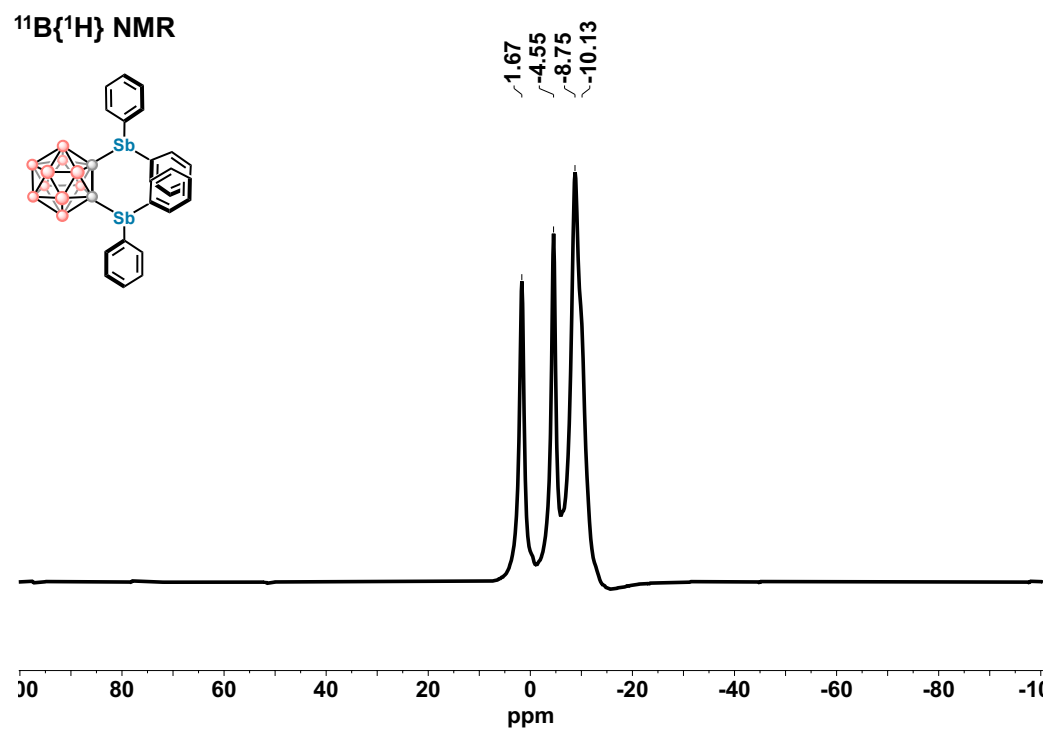

**Figure S8**  $^{11}\text{B}\{^1\text{H}\}$  NMR spectrum of [2a] in  $\text{C}_6\text{D}_6$

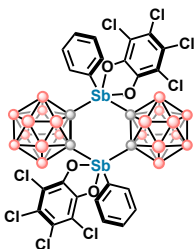

### Synthesis of *o*-(C<sub>2</sub>B<sub>10</sub>H<sub>10</sub>)<sub>2</sub>(SbPh(diolate))<sub>2</sub> [1b]

In an N<sub>2</sub>-filled glovebox, a dry sample of **1a** (100 mg, 1.47 mmol) was dissolved in dichloromethane to give a deep red solution. A concentrated solution of *o*-chloranil (2 equiv., 72.1 mg, 2.93 mmol) in 0.5 mL of dichloromethane was added dropwise to the vigorously stirring stibine solution. Within ~5 minutes, the reaction mixture underwent a distinct color change from deep red to bright orange, consistent with oxidation at antimony. Upon completion, the product began to precipitate as an orange solid. The volatiles were removed *in vacuo*, and the resulting solid was washed thoroughly with hexanes to remove residual oxidant and byproducts, affording the stiborane in quantitative yield.

<sup>1</sup>H NMR (600 MHz, C<sub>6</sub>D<sub>6</sub>, 25 °C): δ (ppm) 2.32 (m, 20H), 7.73 (m, 4H), 7.86 (m, 4H) 7.96 (m, 2H)

<sup>13</sup>C{<sup>1</sup>H} NMR (150 MHz, CDCl<sub>3</sub>, 25 °C): δ (ppm). 134.73, 128.19, 120.14, 184.06, 53.94, 5.74.

<sup>11</sup>B NMR (192 MHz, CDCl<sub>3</sub>, 25 °C): δ (ppm). 1.73 (d, 4B), -4.26 (d, 6B), -9.63(d, 12B).

<sup>11</sup>B{<sup>1</sup>H} NMR (192 MHz, CDCl<sub>3</sub>, 25 °C): δ (ppm). 1.67, -4.25, -9.67.

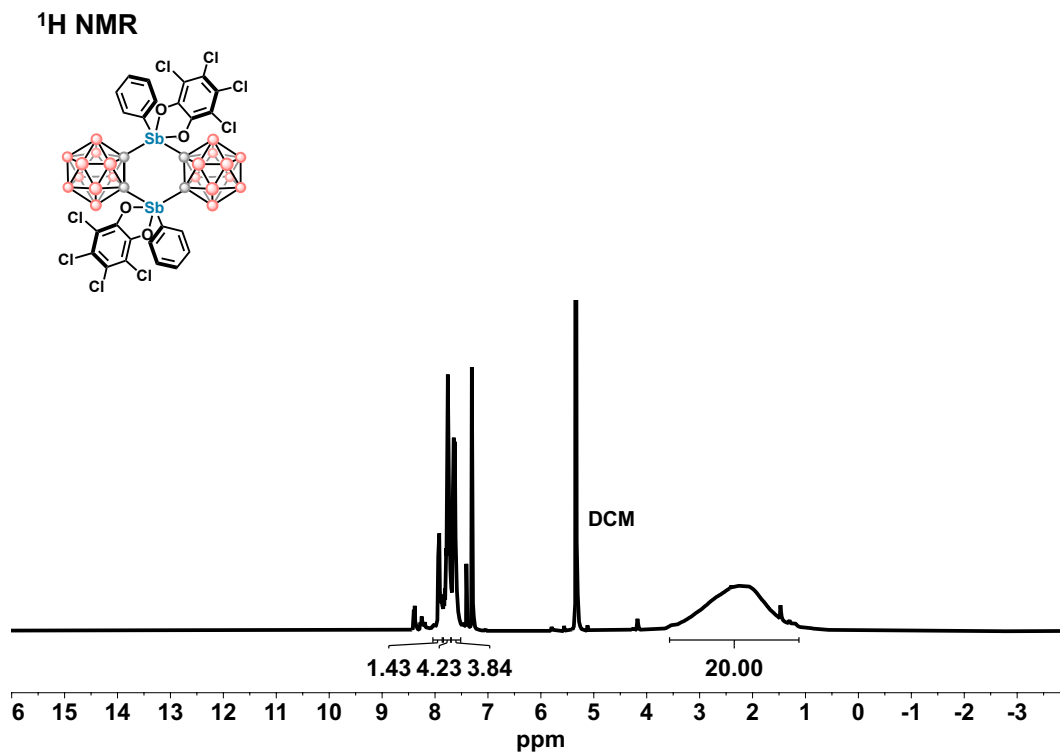

**Figure S9**  $^1\text{H}$  NMR spectrum of **[1b]** in  $\text{C}_6\text{D}_6$

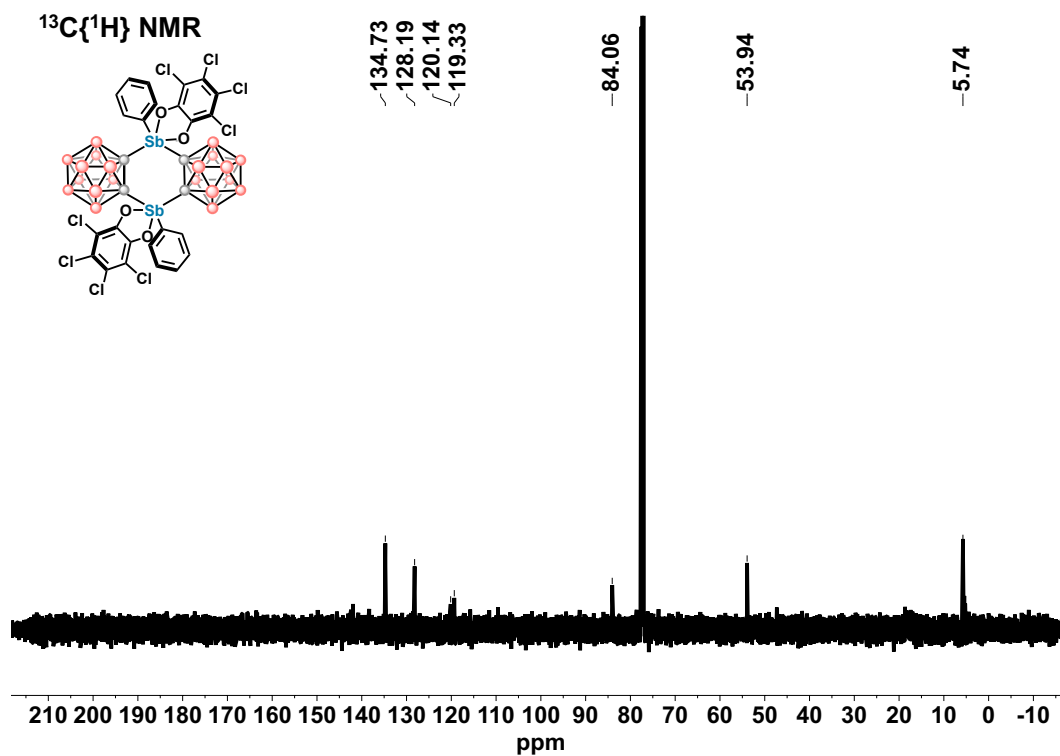

**Figure S10**  $^{13}\text{C}\{^1\text{H}\}$  NMR spectrum of **[1b]** in  $\text{C}_6\text{D}_6$

**$^{11}\text{B}$  NMR**

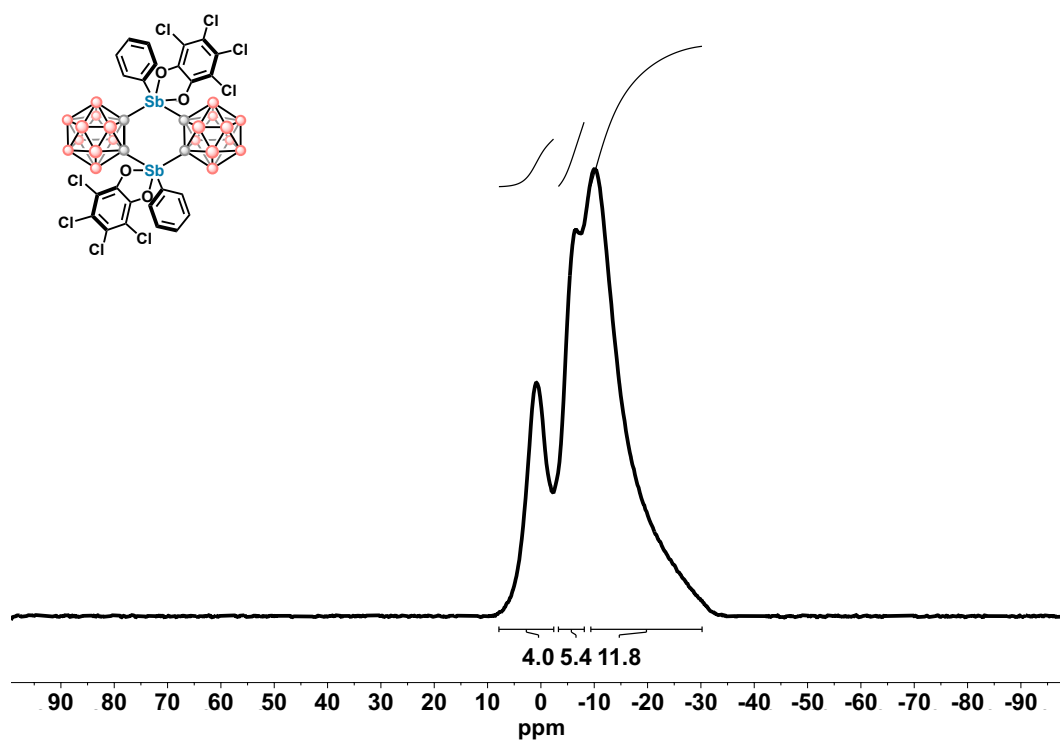

**Figure S11**  $^{11}\text{B}$  NMR spectrum of **[1b]** in  $\text{C}_6\text{D}_6$

**$^{11}\text{B}\{^1\text{H}\}$  NMR**

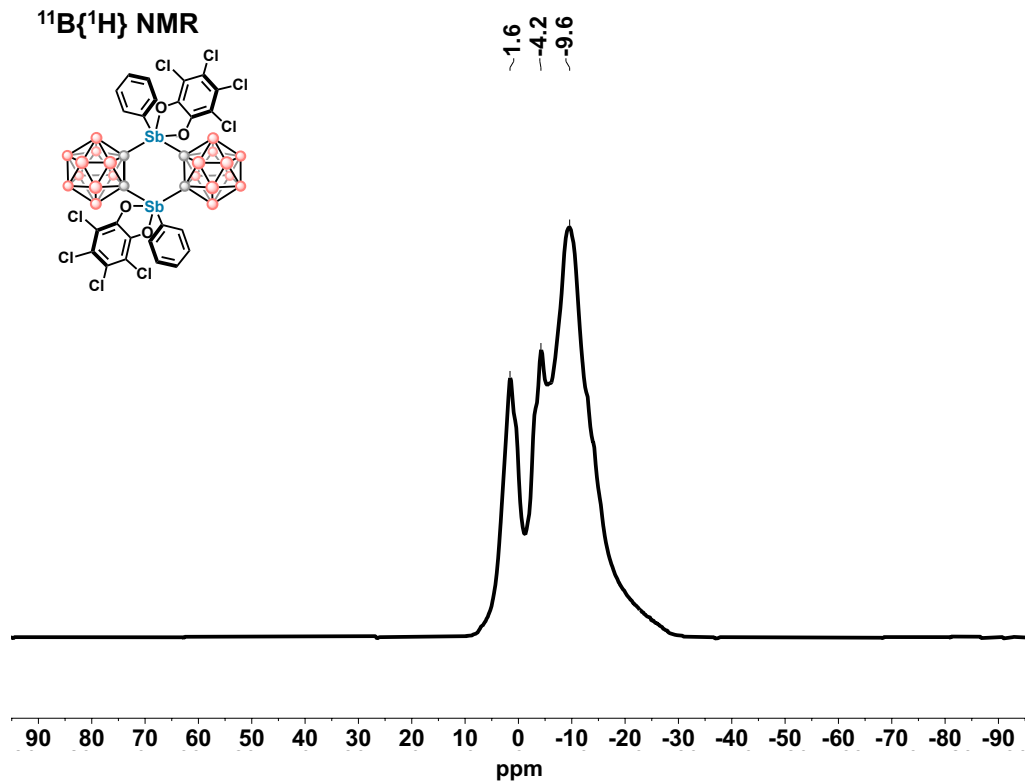

**Figure S12**  $^{11}\text{B}\{^1\text{H}\}$  NMR spectrum of **[1b]** in  $\text{C}_6\text{D}_6$

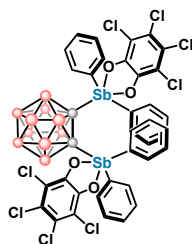

### Synthesis of $o\text{-(C}_2\text{B}_{10}\text{H}_{10}\text{)}(\text{SbPh}_2(\text{diolate}))_2$ [2b]

In an  $\text{N}_2$ -filled glovebox, a dry sample of **2b** (100 mg, 1.44 mmol) was dissolved in dichloromethane. A concentrated solution of *o*-chloranil (2 equiv., 70.83 mg, 2.88 mmol) in 0.5 mL of dichloromethane was added dropwise to the vigorously stirring stibine solution. Over the course of ~5 minutes, the solution gradually shifted from deep red to a uniform deep orange, indicative of oxidation at antimony centers. No precipitation was observed at any point, and the oxidized stiborane remained fully dissolved throughout the reaction. Following complete consumption of starting material, the volatiles were removed *in vacuo*, and the resulting residue was washed with hexanes to remove excess oxidant and byproducts, furnishing the stiborane product in quantitative yield.

$^1\text{H}$  NMR (600 MHz,  $\text{CDCl}_3$ , 25 °C):  $\delta$  (ppm) 2.18 (m, 10H), 7.60 (m, 12H), 7.87 (d, 8H).

$^{13}\text{C}\{^1\text{H}\}$  NMR (150 MHz,  $\text{CDCl}_3$ , 25 °C):  $\delta$  (ppm). 142.90, 136.02, 134.96, 132.77, 129.84, 128.38, 122.87, 117.50.

$^{11}\text{B}$  NMR (192 MHz,  $\text{CDCl}_3$ , 25 °C):  $\delta$  (ppm). 0.82 (bs, 2B), -5.71 (bs, 3B), -9.67 (bs, 5B).

$^{11}\text{B}\{^1\text{H}\}$  NMR (192 MHz,  $\text{CDCl}_3$ , 25 °C):  $\delta$  (ppm). 1.19, -5.72, -9.76.

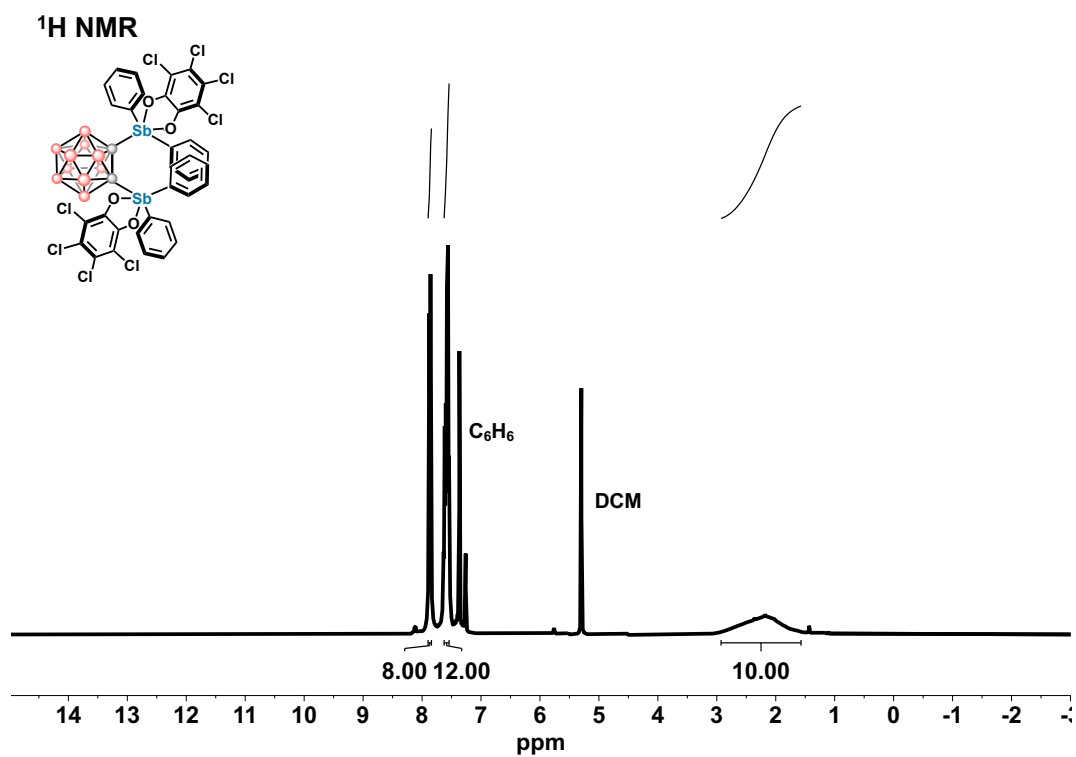

**Figure S13**  $^1\text{H}$  NMR spectrum of **[2b]** in  $\text{CDCl}_3$

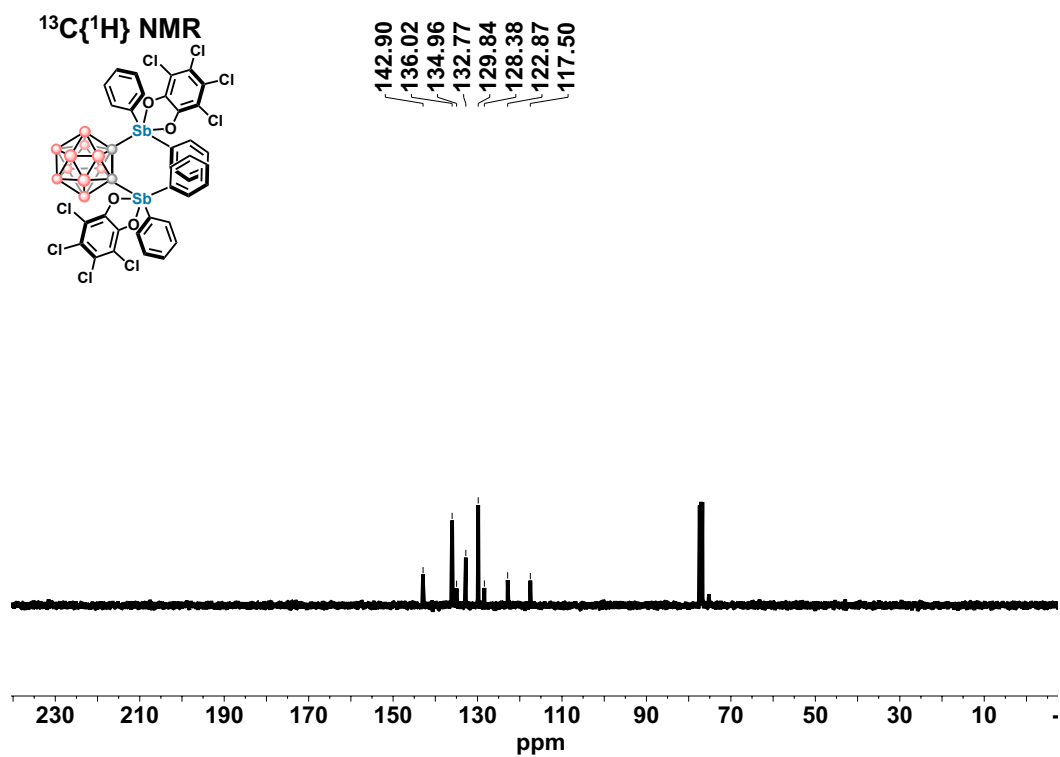

**Figure S14**  $^{13}\text{C}\{^1\text{H}\}$  NMR spectrum of **[2b]** in  $\text{C}_6\text{D}_6$

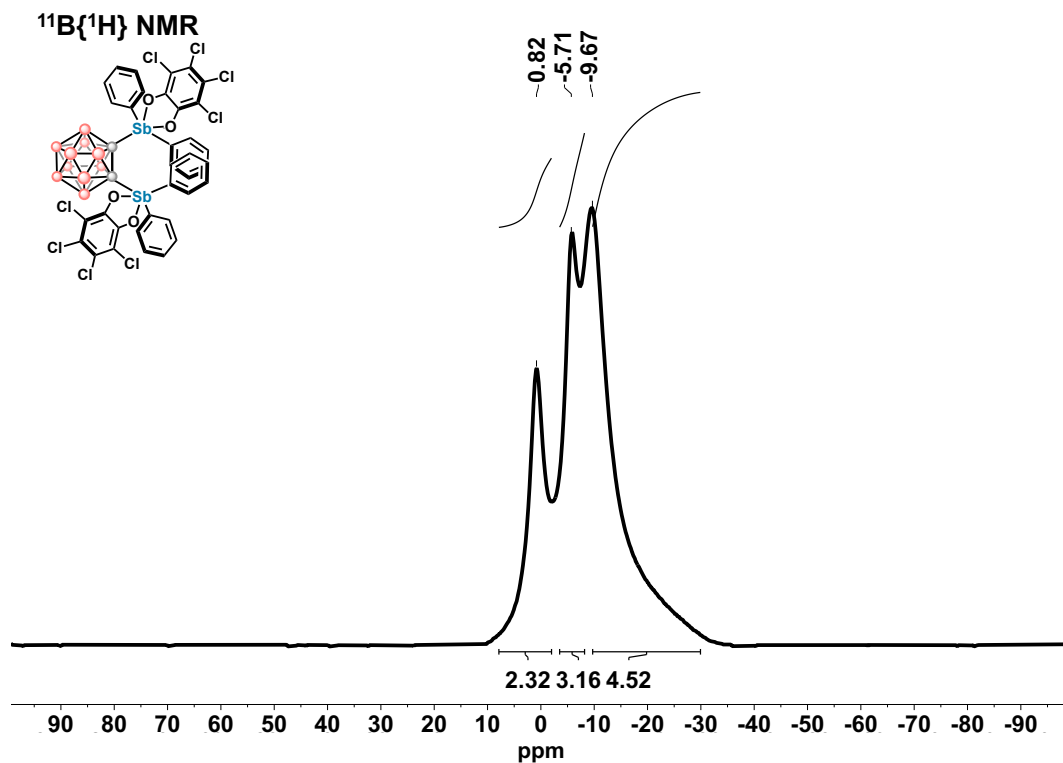

**Figure S15**  $^{11}\text{B}$  NMR spectrum of **[2b]** in  $\text{C}_6\text{D}_6$

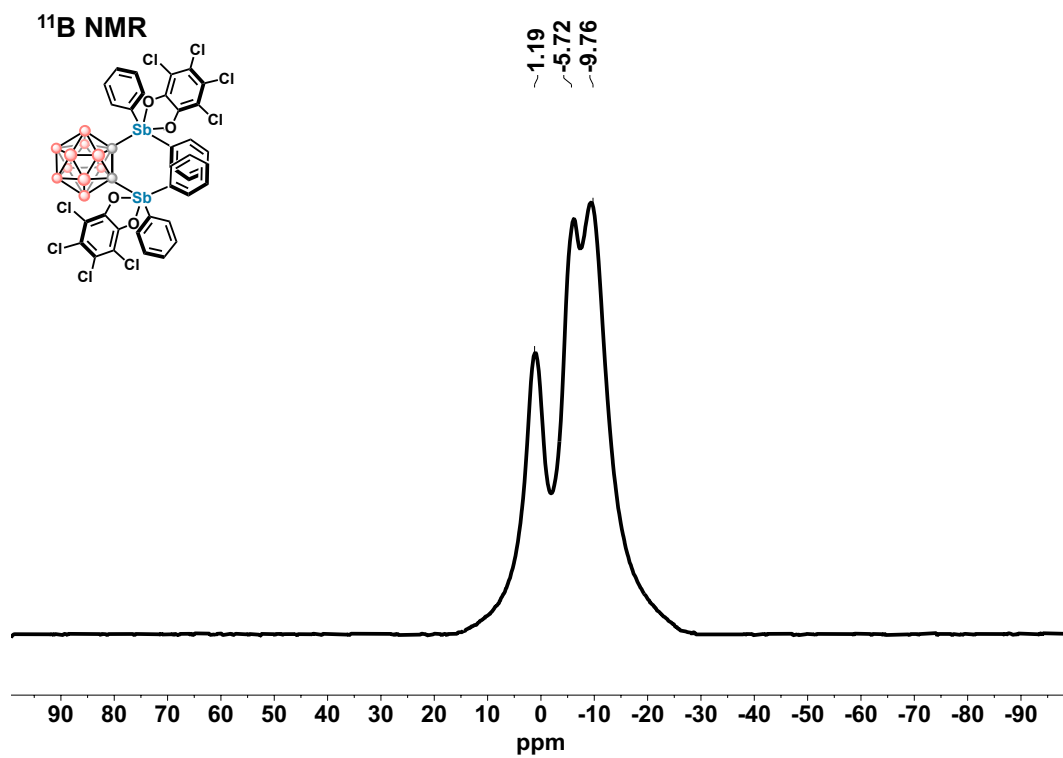

**Figure S16**  $^{11}\text{B}\{^1\text{H}\}$  NMR spectrum of **[2b]** in  $\text{C}_6\text{D}_6$

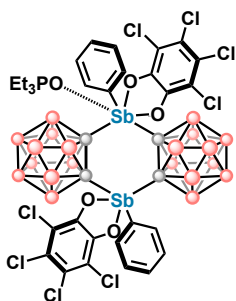

### Synthesis of $[\text{Et}_3\text{PO}][\text{o}-(\text{C}_2\text{B}_{10}\text{H}_{10})_2(\text{SbPh}_2(\text{diolate}))_2]$ [**1c**]

Stiborane **1b** (25 mg, 0.21 mmol) was dissolved in  $\text{CDCl}_3$  in an  $\text{N}_2$ -filled glovebox. To this solution,  $\text{Et}_3\text{PO}$  (1 equiv., 2.86 mg, 0.21 mmol) was added, and the mixture was gently stirred to ensure homogeneity. The resulting solution was transferred to an NMR tube, and a  $^{31}\text{P}$  NMR spectrum was recorded at room temperature. Coordination of  $\text{Et}_3\text{PO}$  to the antimony center resulted in a downfield shift relative to free  $\text{Et}_3\text{PO}$ , which appears at 50.0 ppm in  $\text{CDCl}_3$ , consistent with formation of the Lewis acid–base adduct **1c**.

$^{11}\text{B}$  NMR (192 MHz,  $\text{CDCl}_3$ , 25 °C):  $\delta$  (ppm). 2.19 (bs, B), 6.04 (bs, B), 8.77 (bs, B).

$^{11}\text{B}\{^1\text{H}\}$  NMR (192 MHz,  $\text{CDCl}_3$ , 25 °C):  $\delta$  (ppm). 2.42, -5.39, -8.93

$^{31}\text{P}\{^1\text{H}\}$  NMR (150 MHz,  $\text{CDCl}_3$ , 25 °C):  $\delta$  (ppm). 71.64

**$^{11}\text{B}$  NMR**

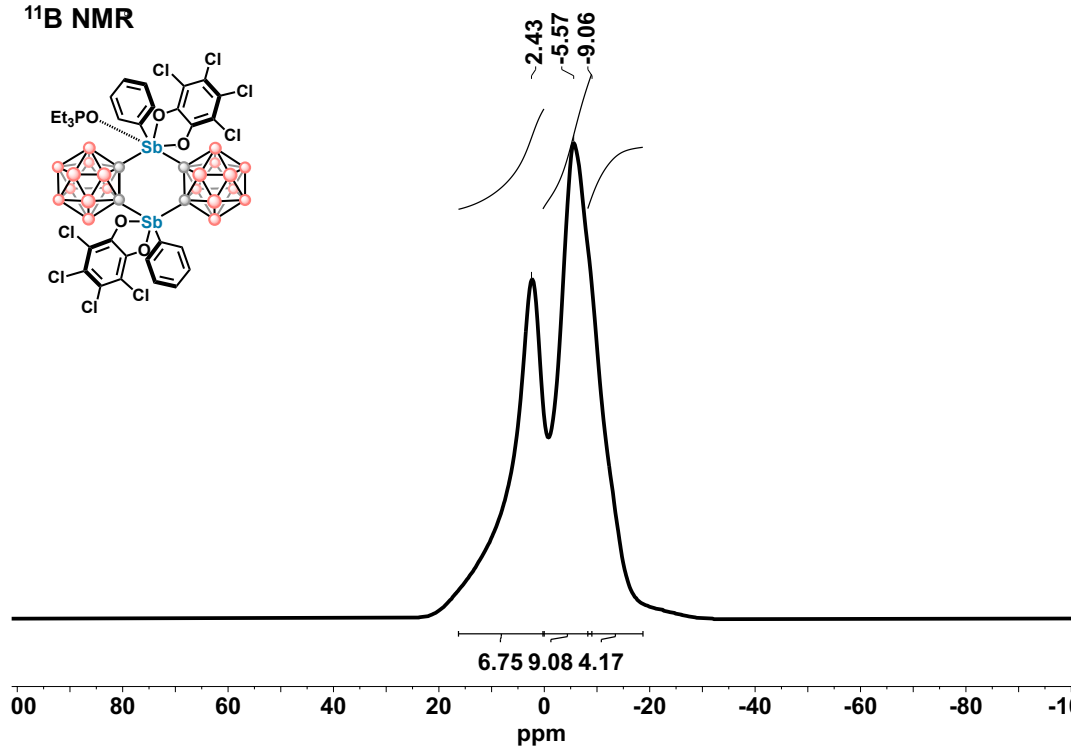

**Figure S17**  $^{11}\text{B}$  NMR spectrum of **[1c]** in  $\text{CDCl}_3$

**$^{11}\text{B}\{^1\text{H}\}$  NMR**

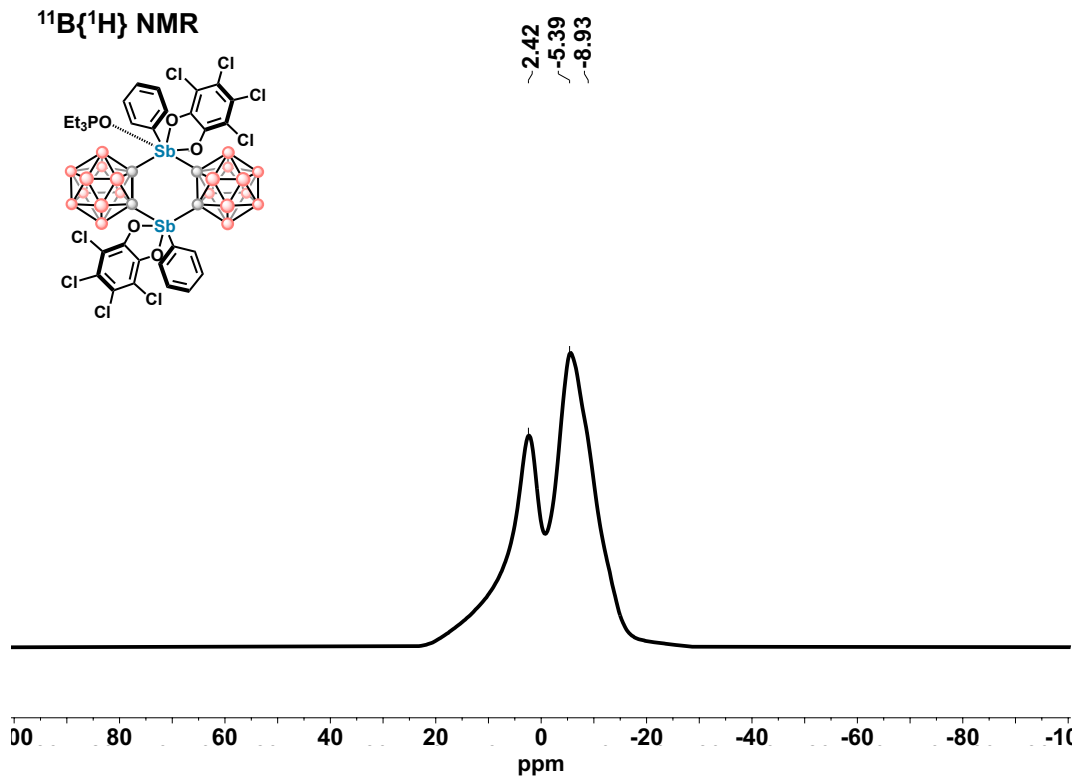

**Figure S18**  $^{11}\text{B}\{^1\text{H}\}$  NMR spectrum of **[1c]** in  $\text{CDCl}_3$

$^{31}\text{P}\{^1\text{H}\}$  NMR

-71.64

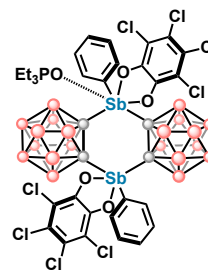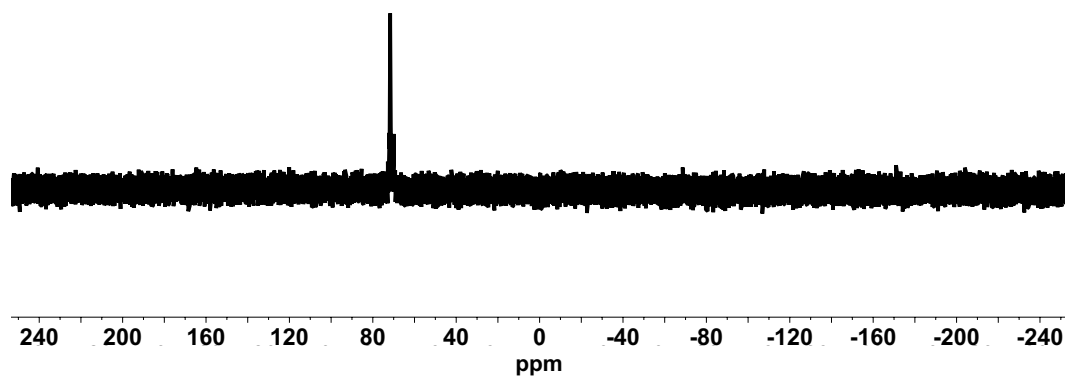

Figure S19  $^{31}\text{P}\{^1\text{H}\}$  NMR spectrum of **[1c]** in  $\text{CDCl}_3$

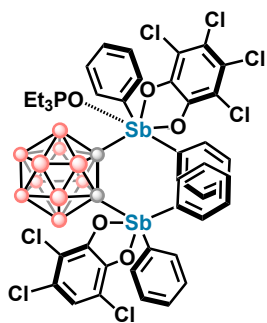

### Synthesis of $[\text{Et}_3\text{PO}][[\text{o}-(\text{C}_2\text{B}_{10}\text{H}_{10})(\text{SbPh}_4(\text{diolate}))_2]$ **[2c]**

Stiborane **2b** (25 mg, 0.21 mmol) was dissolved in  $\text{CDCl}_3$  in an  $\text{N}_2$ -filled glovebox. To this solution,  $\text{Et}_3\text{PO}$  (1 equiv., 2.86 mg, 0.21 mmol) was added, and the mixture was gently stirred to ensure homogeneity. The resulting solution was transferred to an NMR tube, and a  $^{31}\text{P}$  NMR spectrum was recorded at room temperature. Coordination of  $\text{Et}_3\text{PO}$  to the antimony center resulted in a downfield shift relative to free  $\text{Et}_3\text{PO}$ , which appears at 50.0 ppm in  $\text{CDCl}_3$ , consistent with formation of the Lewis acid–base adduct **2c**.

$^{11}\text{B}$  NMR (192 MHz,  $\text{CDCl}_3$ , 25 °C):  $\delta$  (ppm). 1.20 (s, 3B), -5.73 (s, 3B), 9.94 (s, 4B).

$^{11}\text{B}\{^1\text{H}\}$  NMR (192 MHz,  $\text{CDCl}_3$ , 25 °C):  $\delta$  (ppm). 1.20, -5.73, 9.94.

$^{31}\text{P}\{^1\text{H}\}$  NMR (150 MHz,  $\text{CDCl}_3$ , 25 °C):  $\delta$  (ppm). 66.5.

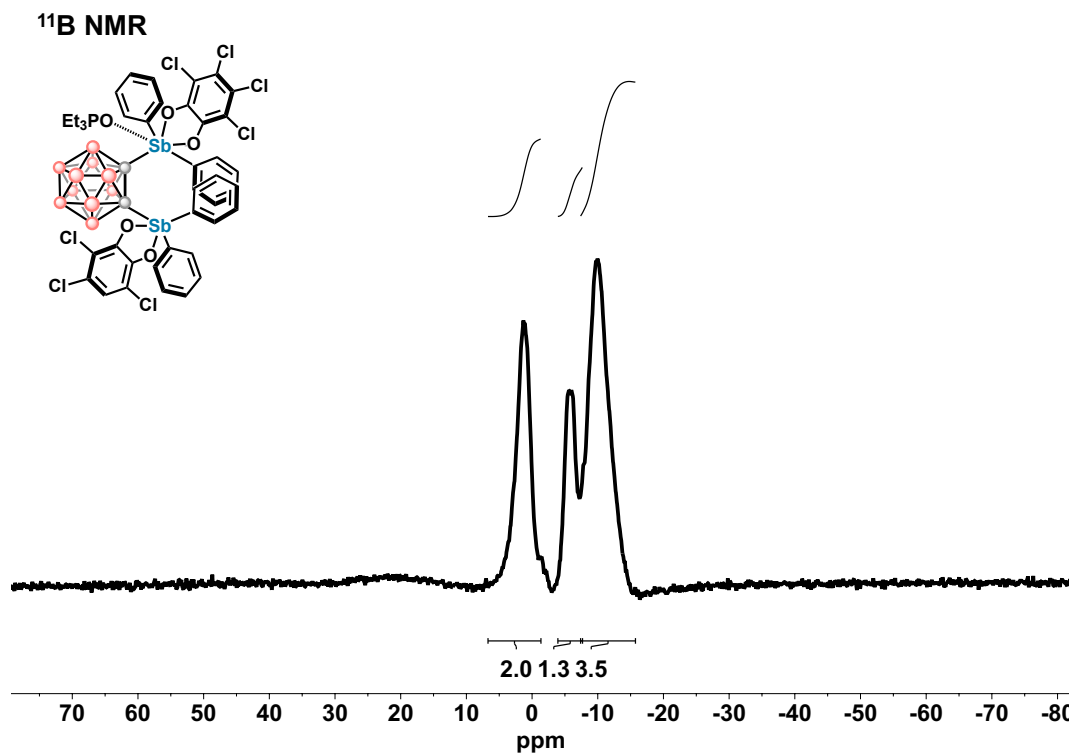

**Figure S20**  $^{11}\text{B}$  NMR spectrum of **[2c]** in  $\text{CDCl}_3$

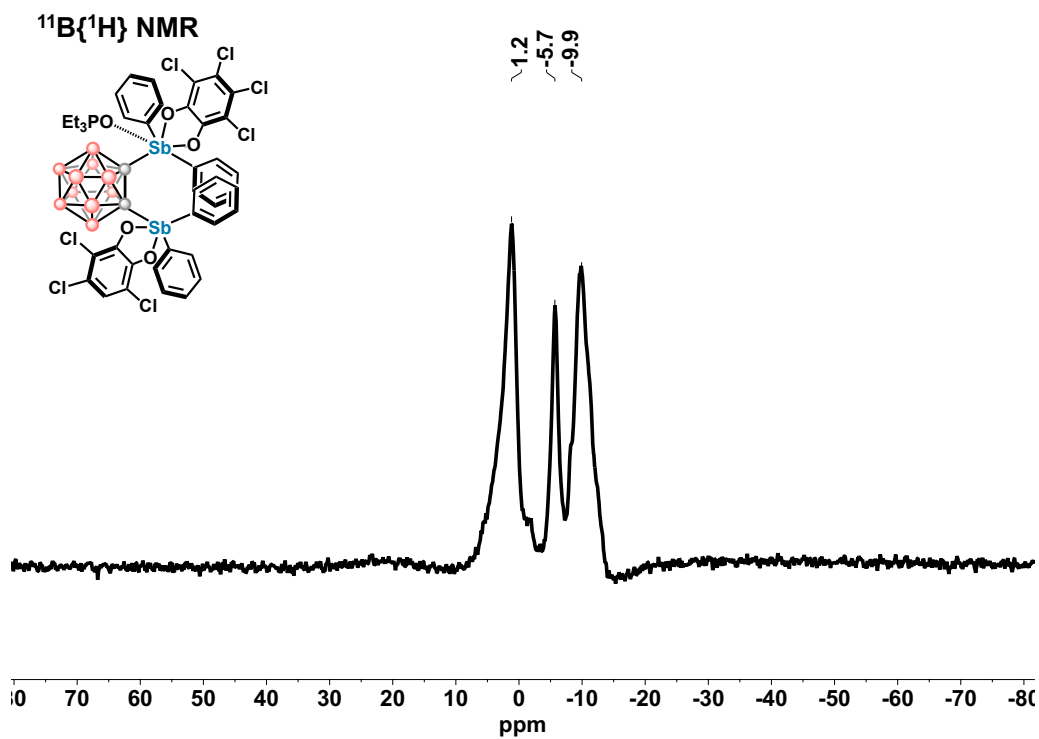

**Figure S21**  $^{11}\text{B}\{^1\text{H}\}$  NMR spectrum of **[2c]** in  $\text{CDCl}_3$

$^{31}\text{P}\{^1\text{H}\}$  NMR  
- 66.52

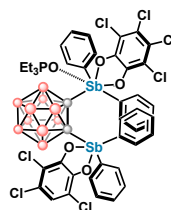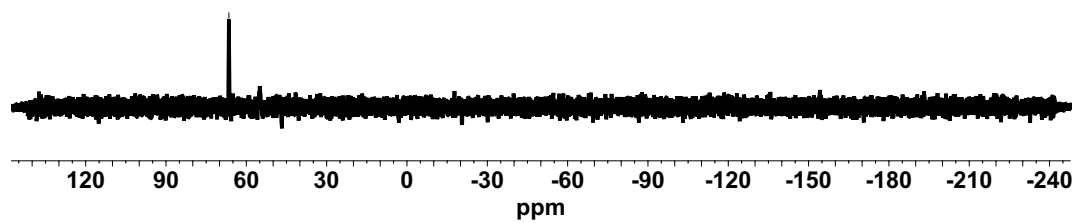

**Figure S22**  $^{31}\text{P}\{^1\text{H}\}$  NMR spectrum of **[2c]** in  $\text{CDCl}_3$

## Fluoride Anion Binding to **1b** and **2b**

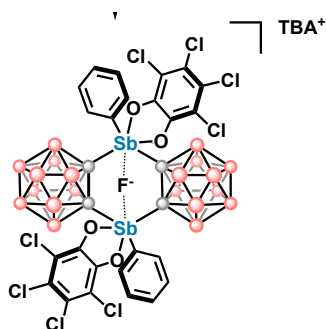

### Synthesis of $[\text{nBu}_4\text{N}][\mu^2\text{-F}^-][\text{o}-(\text{C}_2\text{B}_{10}\text{H}_{10})_2(\text{SbPh}_2(\text{diolate}))_2]$ [**1d**]

In an  $\text{N}_2$ -filled glovebox, stiborane **1b** (50.0 mg, 48.4  $\mu\text{mol}$ ) was dissolved in dichloromethane to give a homogeneous deep orange solution. To this stirring solution,  $[\text{nBu}_4\text{N}][\text{Ph}_3\text{SiF}_2]$  (1 equiv., 26.2 mg, 48.4  $\mu\text{mol}$ ) was added in a single portion. The reaction mixture was allowed to stir at 25  $^\circ\text{C}$  for 10 minutes, during which the color remained orange and no precipitate formed. Clean formation of the fluoride adduct was observed by  $^{19}\text{F}$  NMR spectroscopy, showing disappearance of free  $[\text{Ph}_3\text{SiF}_2]^-$  and appearance of a new resonance corresponding to the Sb–F–Sb bridged species. Following completion, the solvent was removed in vacuo, and the resulting residue was washed with hexanes to remove excess salt and silane-derived byproducts, affording **1d** as a stable orange solid.

$^{11}\text{B}$  NMR (193 MHz,  $\text{C}_6\text{D}_6$ , 25  $^\circ\text{C}$ )  $\delta$  (ppm): 0.61 (s, 5B), -8.60 (s, 15B).

$^{11}\text{B}\{^1\text{H}\}$  NMR (193 MHz,  $\text{C}_6\text{D}_6$ , 25  $^\circ\text{C}$ )  $\delta$  (ppm): 0.96, -7.08, -10.00

$^{19}\text{F}$  NMR (151 MHz,  $\text{C}_6\text{D}_6$ , 25  $^\circ\text{C}$ )  $\delta$  (ppm): -53.83

**$^{11}\text{B}$  NMR**

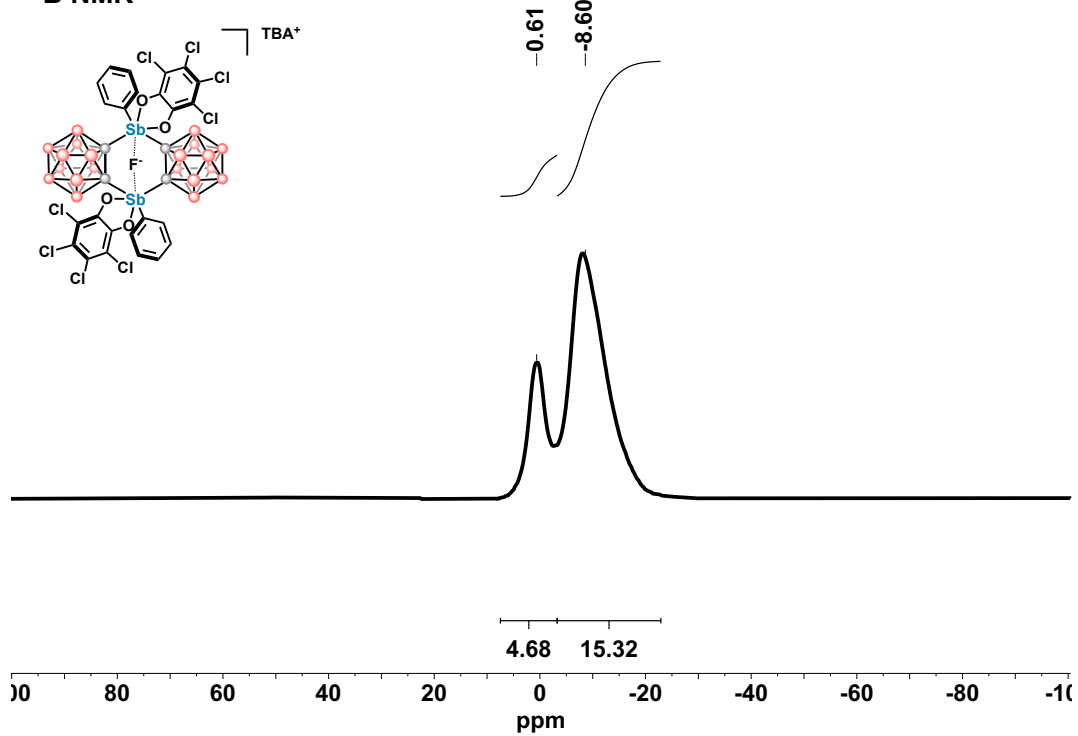

**Figure S23**  $^{11}\text{B}$  NMR spectrum of [1d] in  $\text{C}_6\text{D}_6$

**$^{11}\text{B}\{^1\text{H}\}$  NMR**

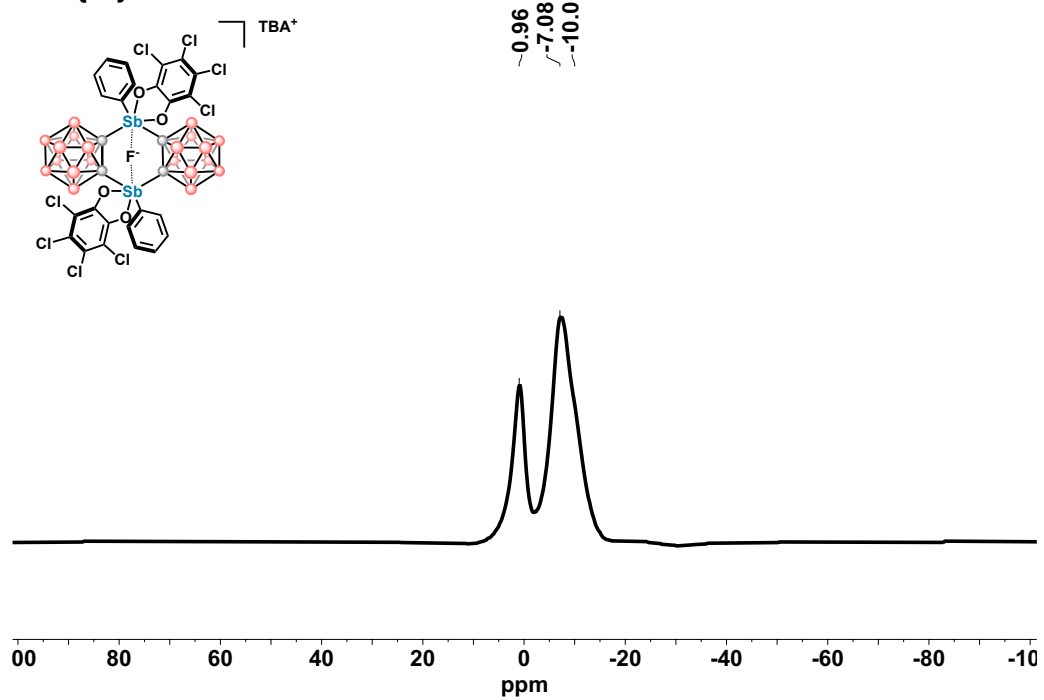

**Figure S24**  $^{11}\text{B}\{^1\text{H}\}$  NMR spectrum of [1d] in  $\text{C}_6\text{D}_6$

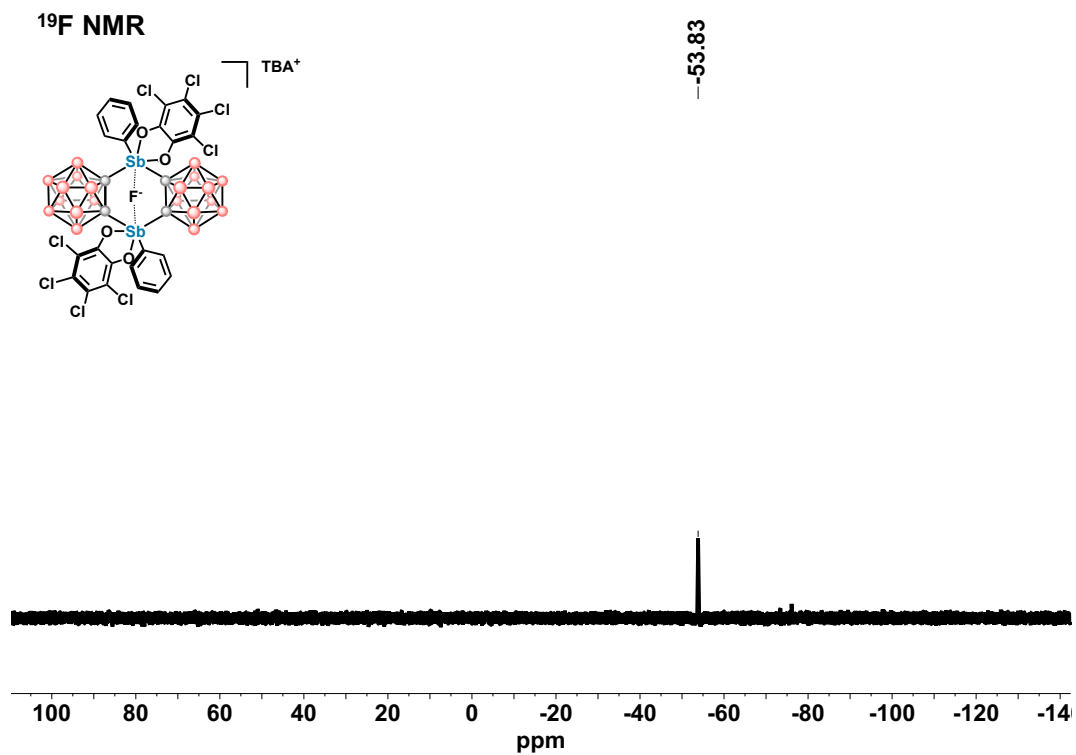

**Figure S25**  $^{19}\text{F}$  NMR spectrum of **[1d]** in  $\text{C}_6\text{D}_6$

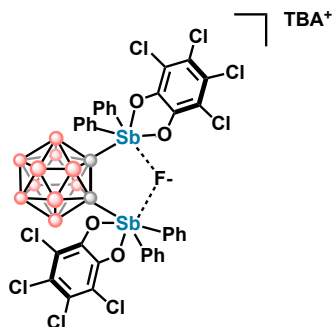

### Synthesis of $[n\text{Bu}_4\text{N}][\mu^2\text{-F}][o\text{-(C}_2\text{B}_{10}\text{H}_{10})\text{(SbPh}_4\text{(diolate))}_2]$ [**2d**]

In an  $\text{N}_2$ -filled glovebox, stiborane **2b** (50.0 mg, 42.2  $\mu\text{mol}$ ) was dissolved in 0.5 mL dichloromethane to afford a homogeneous orange solution. To this stirring solution,  $[n\text{Bu}_4\text{N}][\text{Ph}_3\text{SiF}_2]$  (1.0 equiv., 22.8 mg, 42.2  $\mu\text{mol}$ ) was added in a single portion. The reaction mixture was allowed to stir at 25 °C for 10 minutes, during which no precipitate was observed and the solution remained uniformly orange. Formation of the fluoride adduct was confirmed by  $^{19}\text{F}$  NMR spectroscopy, which showed disappearance of the free  $[\text{Ph}_3\text{SiF}_2]^-$  signal and appearance of a new resonance at approximately  $-77$  ppm, consistent with an Sb–F interaction. The volatiles were then removed *in vacuo*, and the resulting residue was washed with hexanes to remove excess salt and silane-derived byproducts, affording **2d** as an orange solid suitable for further characterization.

$^{11}\text{B}$  NMR (193 MHz,  $\text{C}_6\text{D}_6$ , 25 °C)  $\delta$  (ppm): 0.31 (s, 2B),  $-9.10$  (s, 6B).

$^{11}\text{B}\{^1\text{H}\}$  NMR (193 MHz,  $\text{C}_6\text{D}_6$ , 25 °C)  $\delta$  (ppm): 0.51, 8.59

$^{19}\text{F}$  NMR (151 MHz,  $\text{C}_6\text{D}_6$ , 25 °C)  $\delta$  (ppm):  $-59.40$

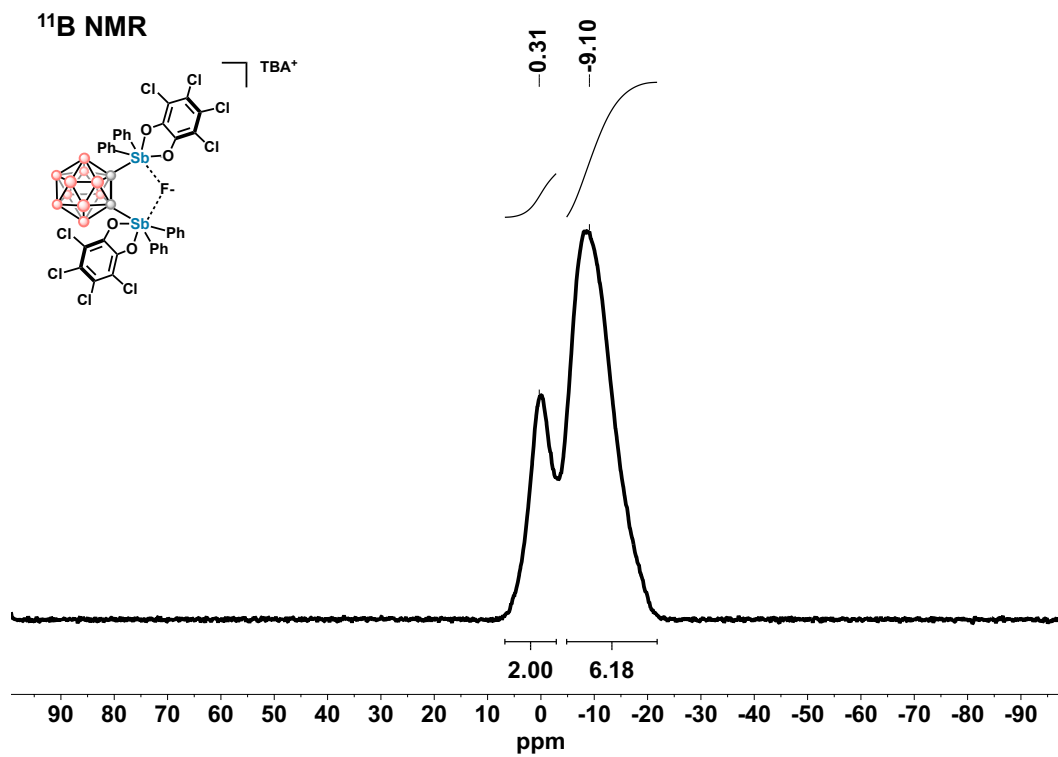

**Figure S26**  $^{11}\text{B}$  NMR spectrum of **[2d]** in  $\text{C}_6\text{D}_6$

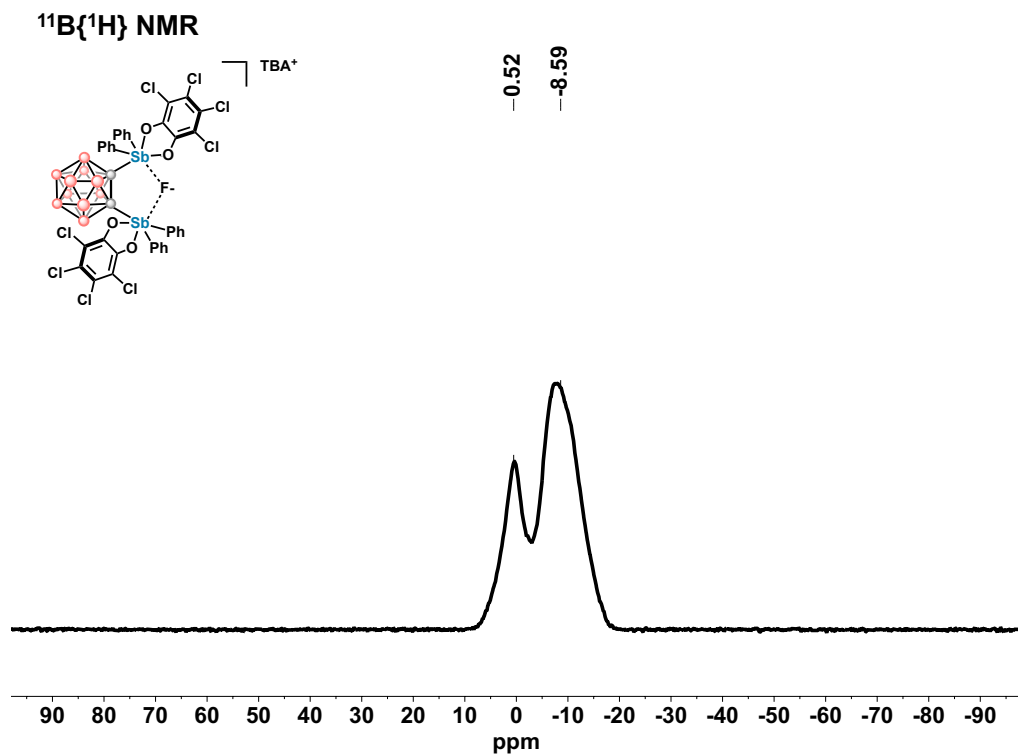

**Figure S27**  $^{11}\text{B}\{^1\text{H}\}$  NMR spectrum of **[2d]** in  $\text{C}_6\text{D}_6$

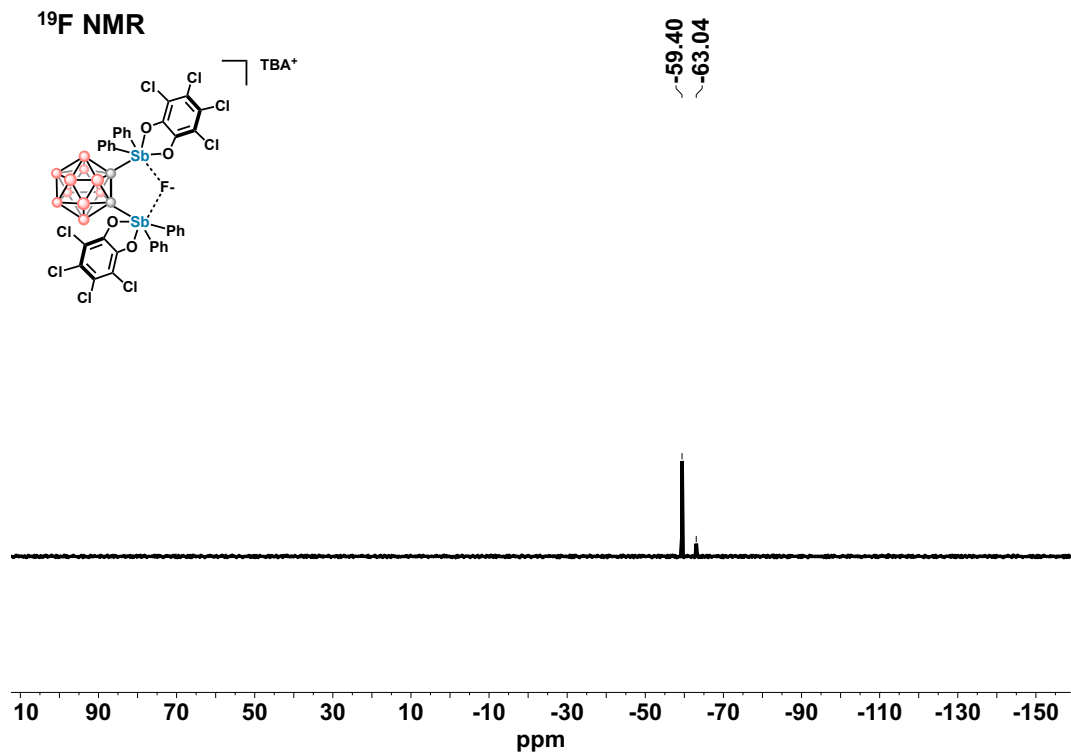

**Figure S28**  $^{19}\text{F}$  NMR spectrum of **[2d]** in  $\text{C}_6\text{D}_6$

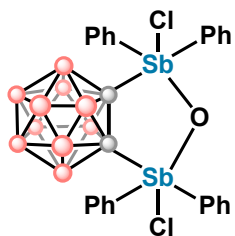

### Synthesis of *o*-(C<sub>2</sub>B<sub>10</sub>H<sub>10</sub>)(SbPh<sub>2</sub>Cl)<sub>2</sub>O [**2e**]

Stiborane **2b** (100 mg, 0.84 mmol) was dissolved in CH<sub>2</sub>Cl<sub>2</sub> (2–3 mL) on the bench to give a homogeneous orange solution. To this stirring solution, a 1:1 mixture of CH<sub>2</sub>Cl<sub>2</sub>/H<sub>2</sub>O (~2 mL total) was added, followed by slow addition of 1.0 equiv. of aqueous HCl (1 M). Upon introduction of the acidic aqueous layer, the reaction mixture immediately turned cloudy and colorless crystalline material began to form. The biphasic mixture was stirred at 25 °C for 10 minutes to ensure complete conversion. The resulting colorless crystals were collected by filtration, washed with cold hexanes and a small amount of water, and dried under vacuum to afford **2e** as a colorless crystalline solid in quantitative yield.

<sup>1</sup>H NMR (600 MHz, C<sub>6</sub>D<sub>6</sub>, 25 °C): δ (ppm). 2.65 (m, 10H), 7.43 (m, 12H), 7.96 (m, 8H).

<sup>13</sup>C{<sup>1</sup>H} NMR (150 MHz, C<sub>6</sub>D<sub>6</sub>, 25 °C): δ (ppm). 139.09, 134.58, 132.21, 129.46, 72.02.

<sup>11</sup>B NMR (192 MHz, C<sub>6</sub>D<sub>6</sub>, 25 °C): δ (ppm). 0.35 (bs, 2B), -6.65 (bs, 4B), -10.87 (bs, 4B).

<sup>11</sup>B{<sup>1</sup>H} NMR (192 MHz, C<sub>6</sub>D<sub>6</sub>, 25 °C): δ (ppm). 0.12, -6.17, -10.25.

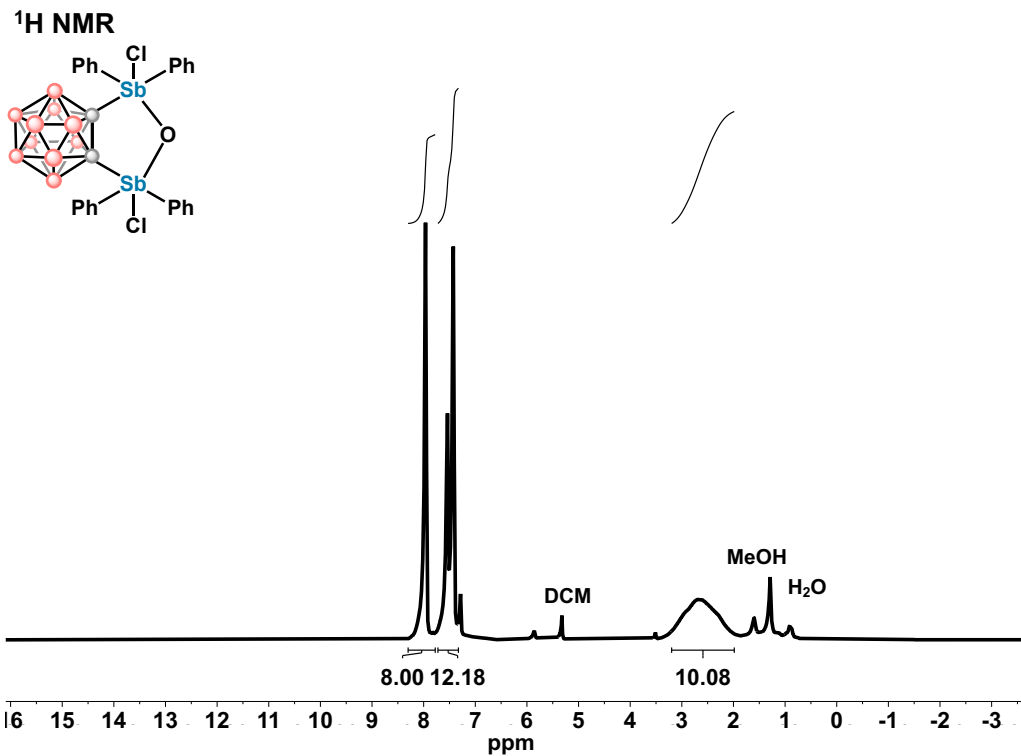

**Figure S29**  $^1\text{H}$  NMR spectrum of **[2e]** in  $\text{C}_6\text{D}_6$

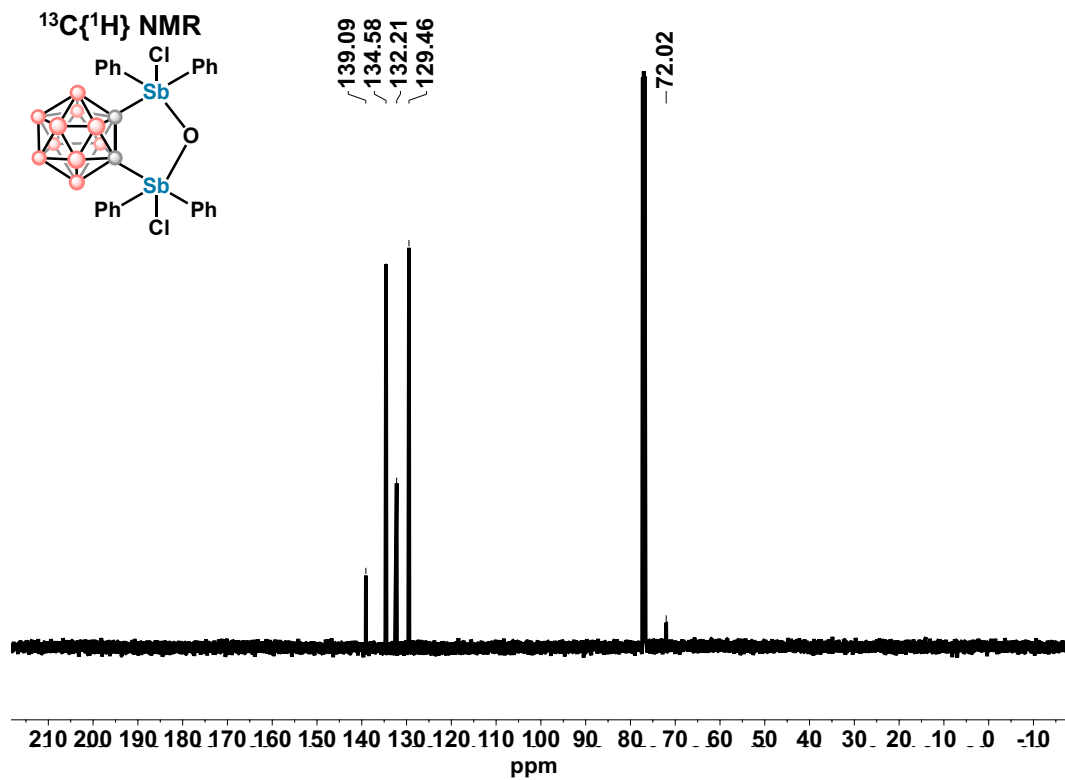

**Figure S30**  $^{13}\text{C}\{^1\text{H}\}$  NMR spectrum of **[2e]** in  $\text{C}_6\text{D}_6$

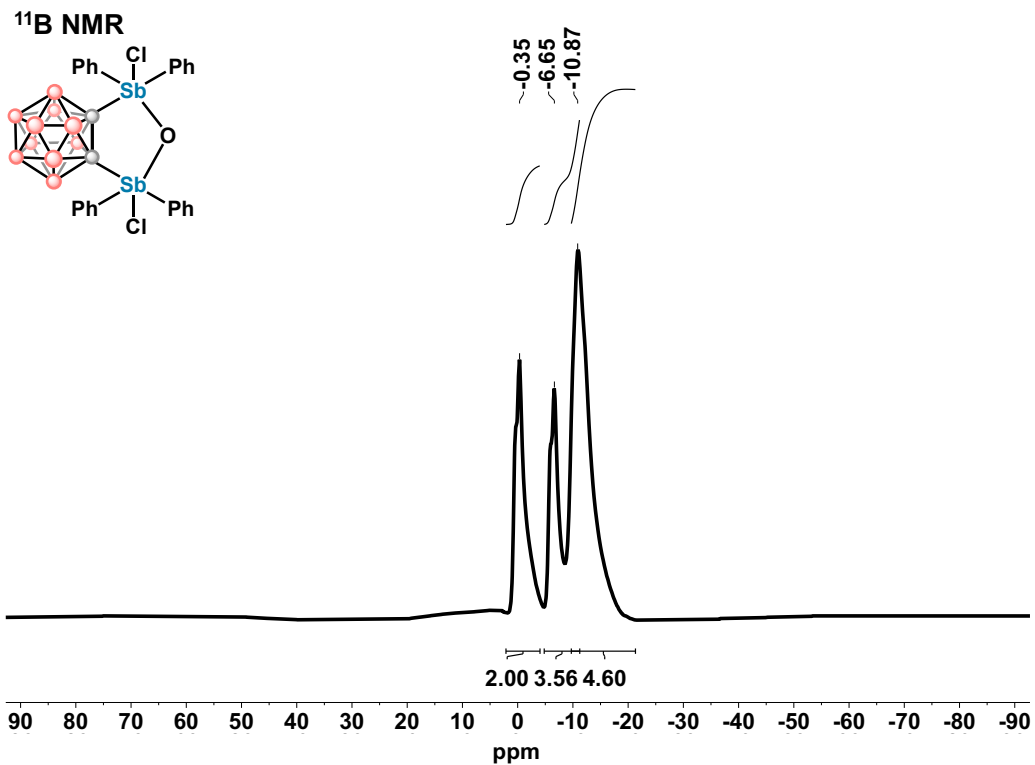

**Figure S31.**  $^{11}\text{B}$  NMR spectrum of **[2e]** in  $\text{C}_6\text{D}_6$

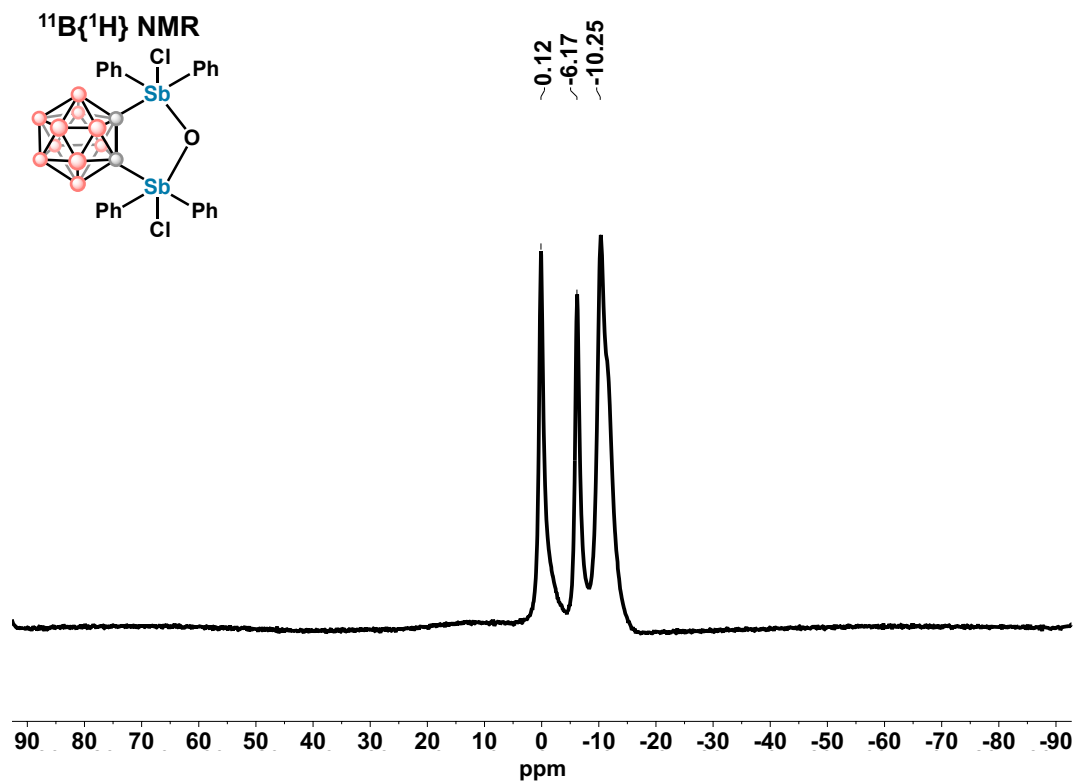

**Figure S32.**  $^{11}\text{B}\{^1\text{H}\}$  NMR spectrum of **[2e]** in  $\text{C}_6\text{D}_6$

## II. Variable Temperature NMR of 1a

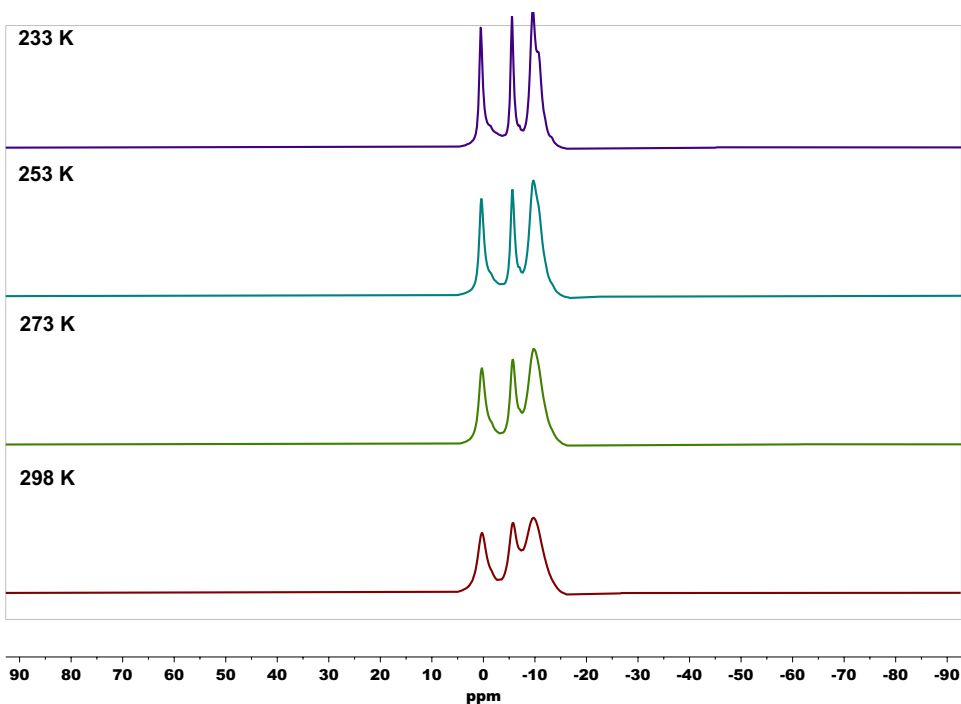

**Figure S33.**  $^{11}\text{B}\{^1\text{H}\}$  NMR spectrum of **[2a]** in  $\text{CDCl}_3$  at 233K, 253K, 273K, 298K.

## III. Gutmann Beckett Titration

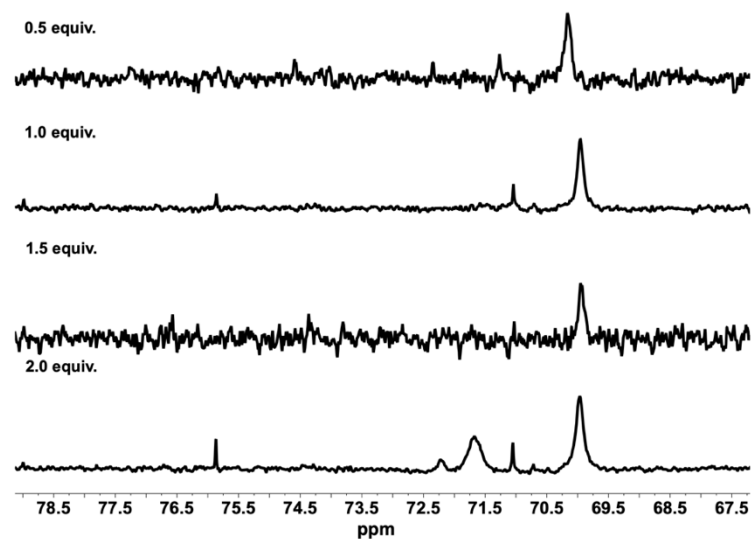

**Figure S34.** Gutmann–Beckett titration of **1b**.  $^{31}\text{P}\{^1\text{H}\}$  NMR spectra recorded in  $\text{CDCl}_3$  showing the progressive coordination shift upon addition of 0.5, 1.0, 1.5, and 2.0 equivalents of  $\text{Et}_3\text{PO}$  to **1b**.

#### IV. Hydrogenation of quinoline using a Hantzsch ester and stiborane catalyst.

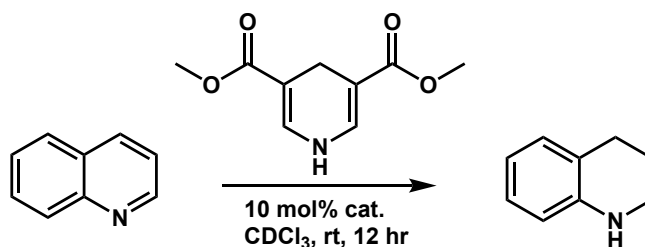

This reaction was prepared inside of a N<sub>2</sub> filled glovebox. Dry CDCl<sub>3</sub> solution (0.7 mL), antimony-based catalyst (0.008 mmol), Hantzsch ester (50 mg, 0.20 mmol), and quinoline (9 μL, 0.08 mmol) was added to a J-Young NMR tube. The tube was then sealed and the formation of the products was monitored by <sup>1</sup>H NMR in situ. The yield of the product was calculated based on the integration of two resonances: 6.4 ppm (d, 1H) and 6.5 ppm (t, 1H). The amount of the unreacted substrate was calculated based on the integration of two resonances: 8.1 ppm (d, 1H) and 8.2 ppm (d, 1H).

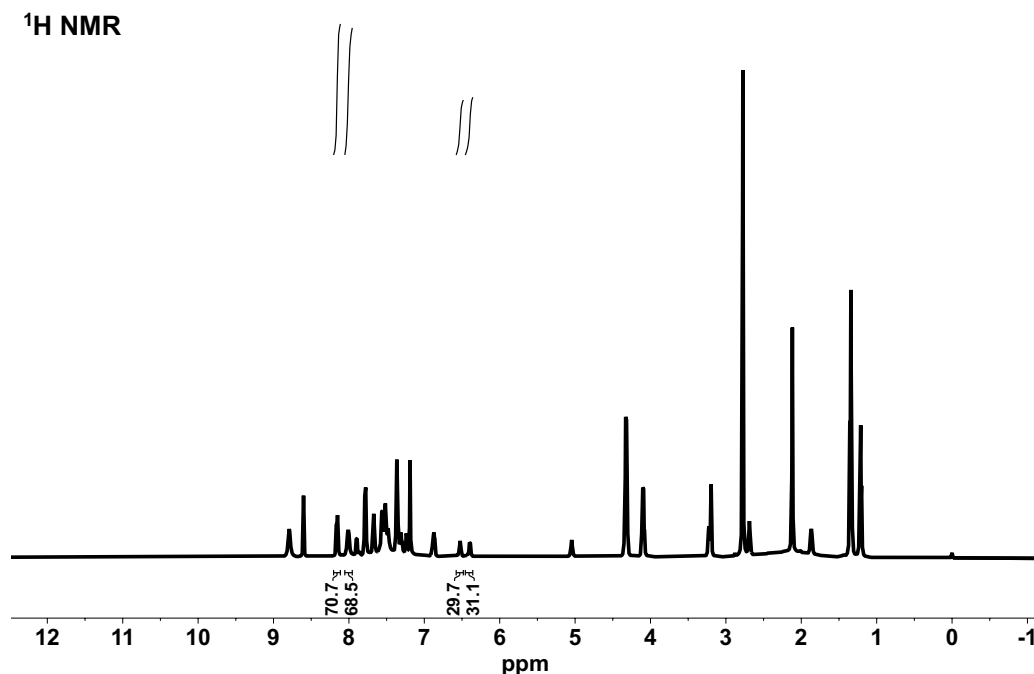

**Figure S35.** <sup>1</sup>H NMR spectrum of hydrogenation reaction using quinoline and Hantzsch ester with **2b** as the catalyst in CDCl<sub>3</sub>.

**<sup>1</sup>H NMR**

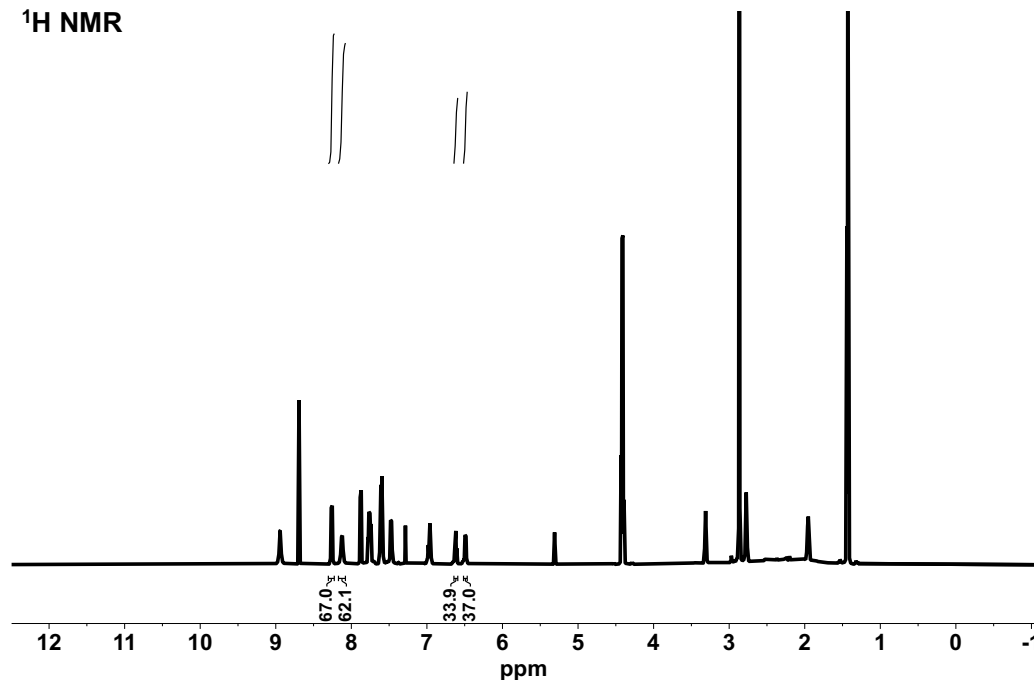

**Figure S36.** <sup>1</sup>H NMR spectrum of hydrogenation reaction using quinoline and Hantzsch ester with **1b** as the catalyst in CDCl<sub>3</sub>.

## V. Optimized Structures and Computational Details

All geometry optimizations of structures were achieved using B3LYP<sup>2</sup>/D3<sup>3</sup>/LANL2Dz<sup>4</sup>/def2-SVP<sup>5</sup> method, in gas phase as implemented in Gaussian16<sup>6</sup>. A split-valence basis set was employed, using LANL2Dz to handle the antimony centers and def2-SVP for all other atoms within the system. Frequency calculations were also conducted at the same level of theory to obtain vibrational frequencies to determine the identity of stationary points as intermediates (no imaginary frequencies), as well as obtaining the thermochemistry: enthalpy (DH) and free energy (DG) at the temperature of 298 K. All structural figures were generated with CYLview.<sup>7</sup> Distances in structural figures are shown in Å and energies are in kJ/mol. Single point energy corrections were carried out further with the following method.

- i) B2PLYPD3<sup>8</sup>/def2qzvpp-def2tzvp//B3LYP-D3/LANL2Dz-def2svp

For FIA, HIA and electron affinity (EA) calculations, Gibbs free energy and enthalpy corrections, as well as all entropic values, were obtained from the above-mentioned frequency calculations and used alongside the calculated Single Point electronic energies. The B2PLYPD3 method was benchmarked against reference FIA values<sup>9</sup> (see Table S5 for detailed benchmarking). Only the SCF portion of the B2PLYPD3 was used when performing the FIA, HIA, and EA calculations, the MP2 correction was not included in the electronic energies. For FIA and HIA calculations, isodesmic anchors were used according to the scheme outlined by Greb<sup>10</sup>, with single point energy corrections calculated using the CCSD(t)<sup>11</sup>/aug-cc-pvtz<sup>12</sup> method in gas phase as implemented in Gaussian16. All EA values were calculated according to the relationship that the adiabatic electron affinity in gas phase is equal to the negative of the change of enthalpy at 0 K, as outlined by Chiu<sup>13</sup> (see Figure S49).

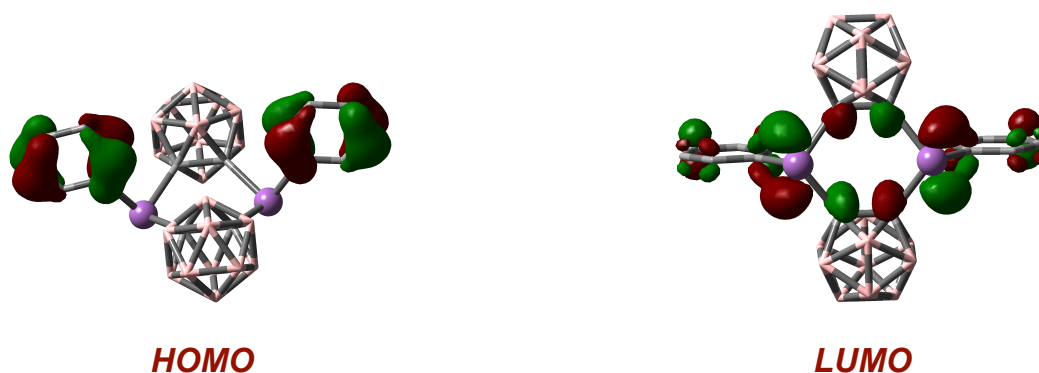

**Figure S35.** HOMO & LUMO orbitals of 1,2-(SbPh)<sub>2</sub>-*ortho*-(C<sub>2</sub>B<sub>10</sub>H<sub>10</sub>)<sub>2</sub> calculated at the B3LYP-D3/LANL2Dz-def2svp level of theory. Constructed using an Isovalue of 0.0

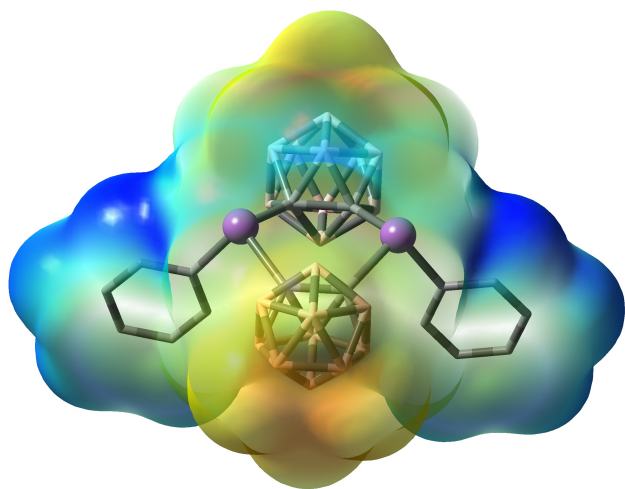

**Figure S36.** Electrostatic Potential Map of 1,2-(SbPh)<sub>2</sub>-*ortho*-(C<sub>2</sub>B<sub>10</sub>H<sub>10</sub>)<sub>2</sub> calculated at the B3LYP-D3/LANL2Dz-def2svp level of theory.

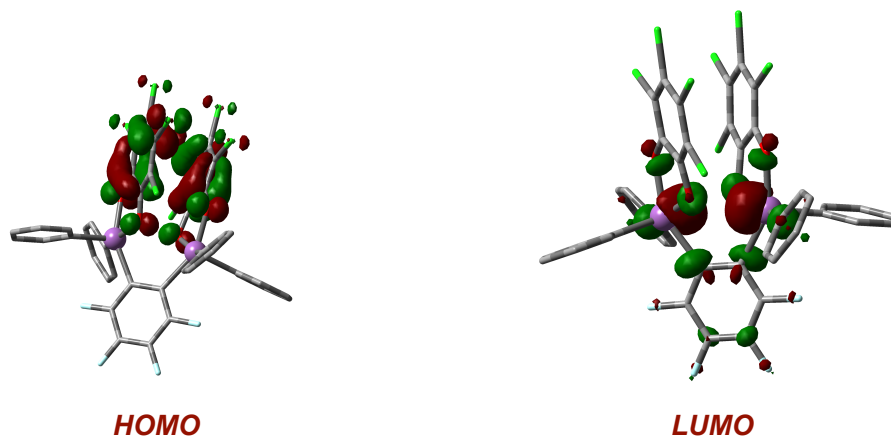

**Figure S37.** HOMO & LUMO orbitals of *o*-(C<sub>6</sub>F<sub>4</sub>)(SbPh<sub>2</sub>(diolate))<sub>2</sub> calculated at the B3LYP-D3/LANL2Dz-def2svp level of theory. HOMO orbitals constructed using an Isovalue of 0.04, LUMO orbitals constructed using an Isovalue of 0.05.

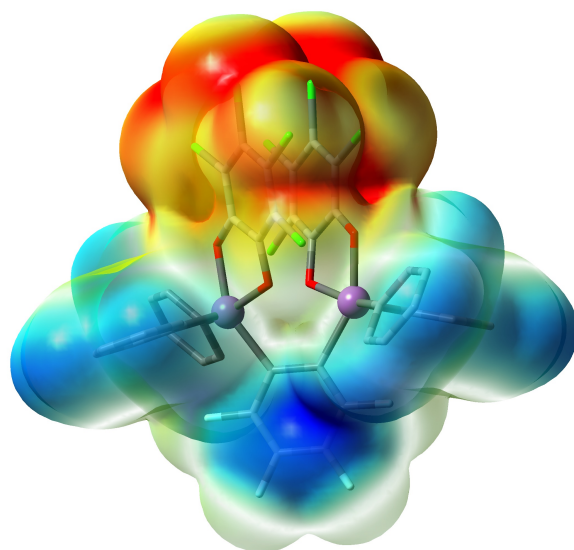

**Figure S38.** Electrostatic Potential Map of  $o\text{-(C}_6\text{F}_4\text{)(SbPh}_2\text{(diolate))}_2$  calculated at the B3LYP-D3/LANL2Dz-def2svp level of theory.

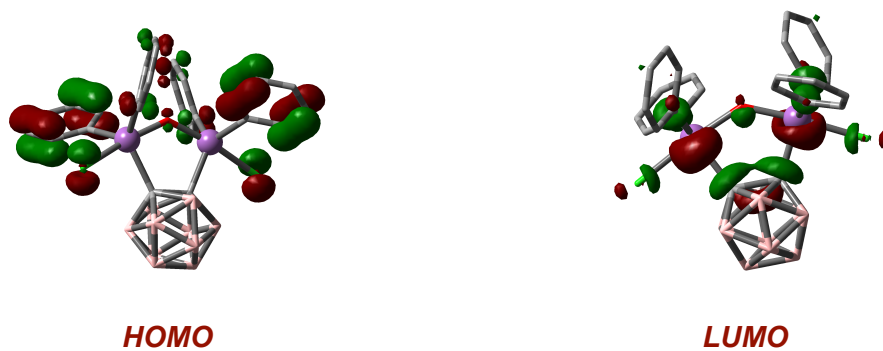

**Figure S39.** HOMO & LUMO orbitals of  $o\text{-(C}_2\text{B}_{10}\text{H}_{10}\text{)(SbPh}_2\text{Cl)}_2\text{O}$  calculated at the B3LYP-D3/LANL2Dz-def2svp level of theory. HOMO orbitals constructed using an Isovalue of 0.04, LUMO orbitals constructed using an Isovalue of 0.05.

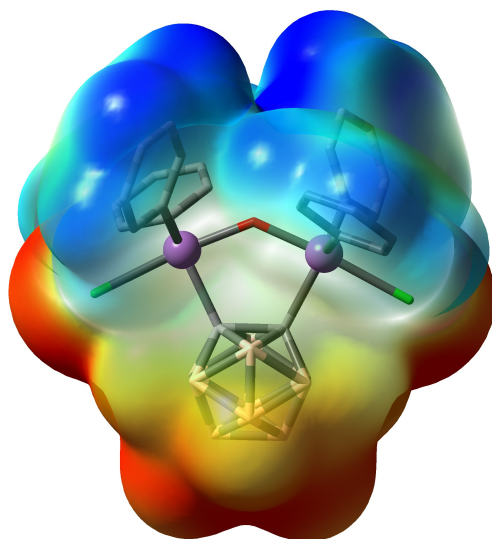

**Figure S40.** Electrostatic Potential Map of *o*-(C<sub>2</sub>B<sub>10</sub>H<sub>10</sub>)(SbPh<sub>2</sub>Cl)<sub>2</sub>O calculated at the B3LYP-D3/LANL2Dz-def2svp level of theory.

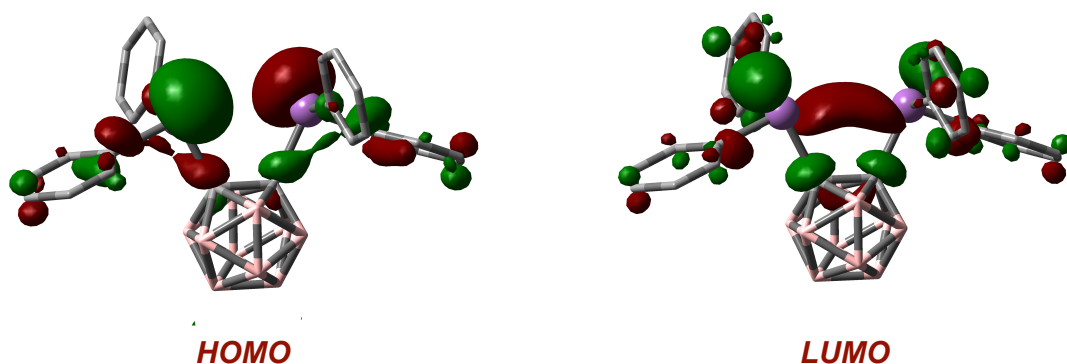

**Figure S41.** HOMO & LUMO orbitals of 1,2-(SbPh<sub>2</sub>)<sub>2</sub>-*ortho*-(C<sub>2</sub>B<sub>10</sub>H<sub>10</sub>) calculated at the B3LYP-D3/LANL2Dz-def2svp level of theory. Constructed using an Isovalue of 0.04.

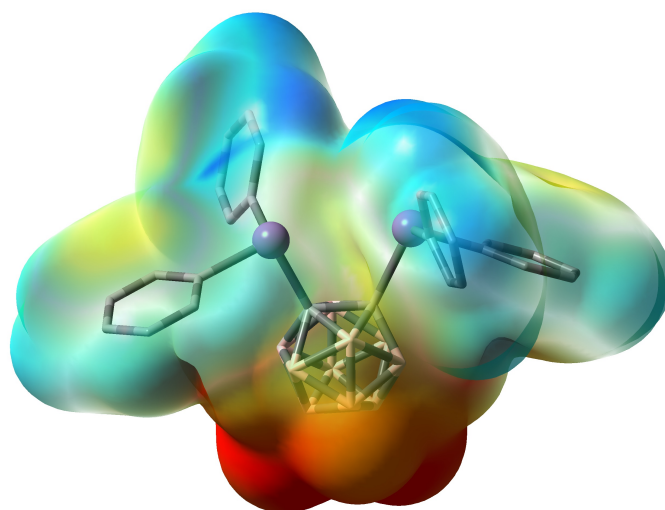

**Figure S42.** Electrostatic Potential Map of 1,2-(SbPh<sub>2</sub>)<sub>2</sub>-*ortho*-(C<sub>2</sub>B<sub>10</sub>H<sub>10</sub>) calculated at the B3LYP-D3/LANL2Dz-def2svp level of theory.

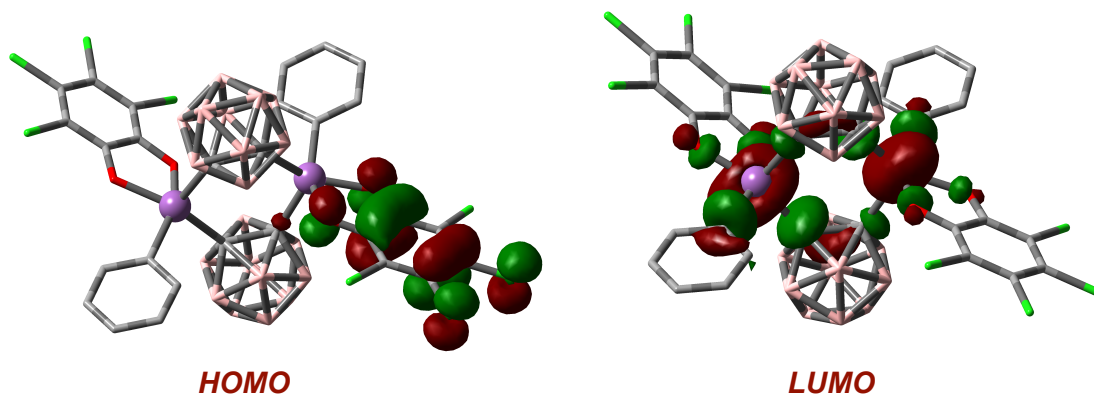

**Figure S43.** HOMO & LUMO orbitals of *o*-(C<sub>2</sub>B<sub>10</sub>H<sub>10</sub>)<sub>2</sub>(SbPh(diolate))<sub>2</sub> calculated at the B3LYP-D3/LANL2Dz-def2svp level of theory. Constructed using an Isovalue of 0.04.

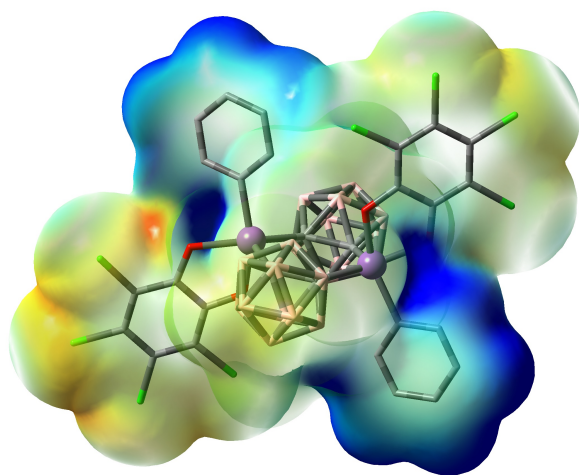

**Figure S44.** Electrostatic Potential Map of  $o\text{-(C}_2\text{B}_{10}\text{H}_{10})_2\text{(SbPh(diolate))}_2$  calculated at the B3LYP-D3/LANL2Dz-def2svp level of theory.

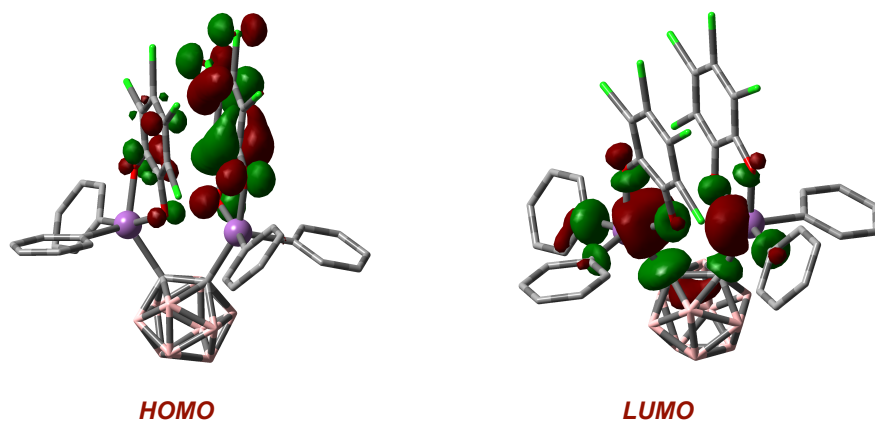

**Figure S45.** HOMO & LUMO orbitals of  $o\text{-(C}_2\text{B}_{10}\text{H}_{10})\text{(SbPh}_2\text{(diolate))}_2$  calculated at the B3LYP-D3/LANL2Dz-def2svp level of theory. Constructed using an Isovalue of 0.04.

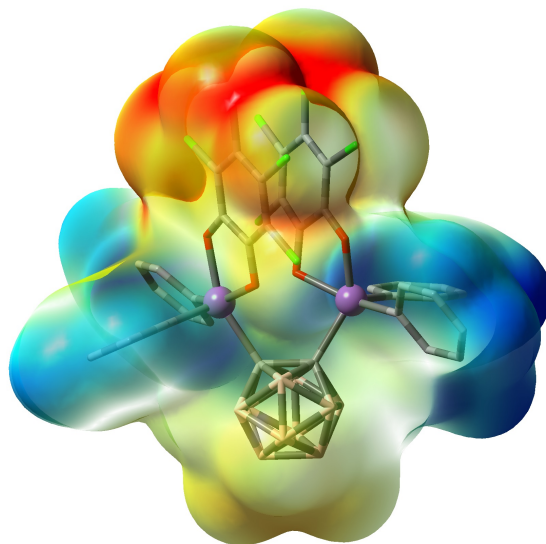

**Figure S46.** Electrostatic Potential Map of  $o\text{-(C}_2\text{B}_{10}\text{H}_{10})\text{(SbPh}_2\text{(diolate))}_2$  calculated at the B3LYP-D3/LANL2Dz-def2svp level of theory.

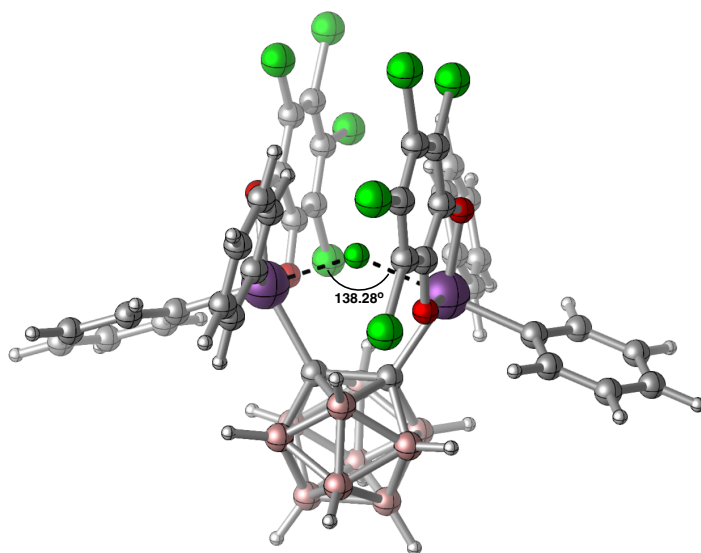

**Figure S47.** Vertex angle of  $o\text{-(C}_2\text{B}_{10}\text{H}_{10})\text{(SbPh}_2\text{(diolate))}_2$  between the fluoride anion and metal centers is shown. Bond lengths represented by dashed lines are both 2.14 angstroms.

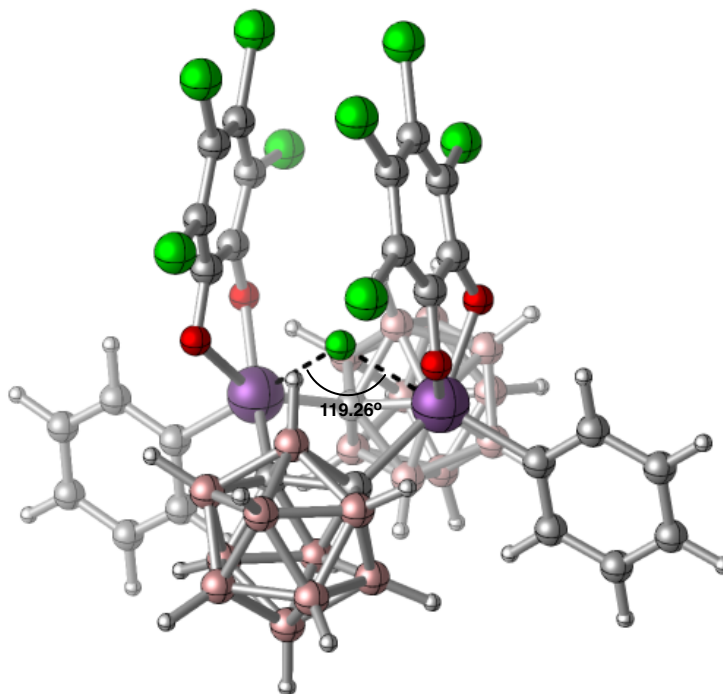

**Figure S48.** Vertex angle of  $o\text{-(C}_2\text{B}_{10}\text{H}_{10})_2\text{(SbPh(diolate))}_2$  between the fluoride anion and metal centers is shown. Bond lengths represented by dashed lines are both 2.16 angstroms.

$$EA = -\Delta_g H^0 K = -\Delta_g G^0 - 0.00027 \text{ eV} - T\Delta_g S$$

**Equation S1.** Adiabatic electron affinity gas phase values were calculated using the relationship shown. All electron affinity values were calculated in eV at 298.15K. The 0.00027 eV term in the equation arises from the free energy of the electron computed from Boltzmann statistics.<sup>13</sup>

| Structure                                                                                   | HOMO  | LUMO   | Gap  |
|---------------------------------------------------------------------------------------------|-------|--------|------|
| <b>1,2-(SbPh<sub>2</sub>)<sub>2</sub>-ortho-(C<sub>2</sub>B<sub>10</sub>H<sub>10</sub>)</b> | -6.56 | -1.78  | 4.78 |
| <b>1,2-(SbPh)<sub>2</sub>-ortho-(C<sub>2</sub>B<sub>10</sub>H<sub>10</sub>)<sub>2</sub></b> | -7.47 | -1.695 | 5.51 |
| <b>o-(C<sub>6</sub>F<sub>4</sub>)(SbPh<sub>2</sub>(diolate))<sub>2</sub></b>                | -5.65 | -2.12  | 3.53 |
| <b>o-(C<sub>2</sub>B<sub>10</sub>H<sub>10</sub>)<sub>2</sub>(SbPh(diolate))<sub>2</sub></b> | -6.32 | -3.13  | 3.19 |
| <b>o-(C<sub>2</sub>B<sub>10</sub>H<sub>10</sub>)(SbPh<sub>2</sub>(diolate))<sub>2</sub></b> | -5.71 | -2.53  | 3.19 |
| <b>o-(C<sub>2</sub>B<sub>10</sub>H<sub>10</sub>)(SbPh<sub>2</sub>Cl)<sub>2</sub>O</b>       | -7.41 | -1.92  | 5.49 |

**Table S1.** HOMO & Lumo Gas Phase Values calculated at the B3LYP-D3/LANL2Dz-def2svp level of theory, values are reported in eV.

| Structure                | Electronic Energy (a.u.) | Enthalpic Correction (a.u.) | FIA/HIA Value (kJ/mol) |
|--------------------------|--------------------------|-----------------------------|------------------------|
| <b>Fluoride</b>          | -99.749537               | 0.00236                     | -                      |
| <b>SiFMe<sub>3</sub></b> | -508.437142              | 0.122589                    | 941.433411             |
| <b>SiMe<sub>3</sub></b>  | -408.326245              | 0.117442                    | -                      |
| <b>Hydride</b>           | -0.526562                | 0.00236                     | -                      |
| <b>SiHMe<sub>3</sub></b> | -409.212591              | 0.1272                      | 925.189443             |

**Table S2.** Isodesmic anchor calculations reported in kJ/mol, calculated at the CCSD(t)/aug-cc-pvtz//B3LYP-D3/LANL2Dz-def2svp level of theory.

| Structure                                                                                   | Electronic Energy (a.u.) | Enthalpic Correction (a.u.) | FIA Value (kJ/mol) |
|---------------------------------------------------------------------------------------------|--------------------------|-----------------------------|--------------------|
| <b>1,2-(SbPh<sub>2</sub>)<sub>2</sub>-ortho-(C<sub>2</sub>B<sub>10</sub>H<sub>10</sub>)</b> | -1834.794459             | 0.552338                    | 248.73055          |
| <b>1,2-(SbPh)<sub>2</sub>-ortho-(C<sub>2</sub>B<sub>10</sub>H<sub>10</sub>)<sub>2</sub></b> | -1702.546974             | 0.523157                    | 282.56613          |
| <b>o-(C<sub>6</sub>F<sub>4</sub>)(SbPh<sub>2</sub>(diolate))<sub>2</sub></b>                | -6569.090449             | 0.56901                     | 387.32077          |
| <b>o-(C<sub>2</sub>B<sub>10</sub>H<sub>10</sub>)<sub>2</sub>(SbPh(diolate))<sub>2</sub></b> | -6139.748777             | 0.647185                    | 448.22097          |
| <b>o-(C<sub>2</sub>B<sub>10</sub>H<sub>10</sub>)(SbPh<sub>2</sub>(diolate))<sub>2</sub></b> | -6272.045228             | 0.677463                    | 449.72502          |
| <b>o-(C<sub>2</sub>B<sub>10</sub>H<sub>10</sub>)(SbPh<sub>2</sub>Cl)<sub>2</sub>O</b>       | -2830.048882             | 0.564397                    | 308.27881          |

**Table S3.** FIA gas phase values reported in kJ/mol, calculated at the B2PLYPD3/def2qzvpp-def2tzvp//B3LYP-D3/LANL2Dz-def2svp level of theory using a 941.433411 kJ/mol TMS anchor.

| Structure                                                                                   | Electronic Energy (a.u.) | Enthalpic Correction (a.u.) | HIA Value (kJ/mol) |
|---------------------------------------------------------------------------------------------|--------------------------|-----------------------------|--------------------|
| <b>1,2-(SbPh<sub>2</sub>)<sub>2</sub>-ortho-(C<sub>2</sub>B<sub>10</sub>H<sub>10</sub>)</b> | -1735.549435             | 0.554978                    | 183.91003          |
| <b>1,2-(SbPh)<sub>2</sub>-ortho-(C<sub>2</sub>B<sub>10</sub>H<sub>10</sub>)<sub>2</sub></b> | -1603.315039             | 0.525124                    | 253.87782          |
| <b>o-(C<sub>6</sub>F<sub>4</sub>)(SbPh<sub>2</sub>(diolate))<sub>2</sub></b>                | -6469.855792             | 0.573232                    | 345.56574          |
| <b>o-(C<sub>2</sub>B<sub>10</sub>H<sub>10</sub>)<sub>2</sub>(SbPh(diolate))<sub>2</sub></b> | -6040.524090             | 0.650344                    | 435.43209          |
| <b>o-(C<sub>2</sub>B<sub>10</sub>H<sub>10</sub>)(SbPh<sub>2</sub>(diolate))<sub>2</sub></b> | -6172.804439             | 0.681221                    | 393.08776          |

**Table S4.** HIA gas phase values reported in kJ/mol, calculated at the B2PLYPD3/def2qzvpp-def2tzvp//B3LYP-D3/LANL2Dz-def2svp level of theory using a 925.189443 kJ/mol TMS anchor.

| <b>Structure</b>        | <b>Method 1</b><br>(B2PLYPD3/def2qzvpp-def2tzvp//B3LYP-D3/LANL2Dz-def2svp) | <b>Method 2</b><br>(B2PLYPD3/def2qzvpp//B3LYP-D3/LANL2Dz-def2svp) | <b>Method 3</b><br>(pbe1pbe-D3BJ/def2qzvpp//B3LYP-D3/LANL2Dz-def2svp) | <b>Reference FIA Value*</b> |
|-------------------------|----------------------------------------------------------------------------|-------------------------------------------------------------------|-----------------------------------------------------------------------|-----------------------------|
| <b>SbH<sub>5</sub></b>  | 211.6048                                                                   | 226.7906                                                          | 348.05466                                                             | 219                         |
| <b>SbF<sub>5</sub></b>  | 493.06627                                                                  | 507.37787                                                         | 611.42644                                                             | 496                         |
| <b>SbCl<sub>5</sub></b> | 432.41985                                                                  | 447.33269                                                         | 562.516                                                               | 438                         |
| <b>SbBr<sub>5</sub></b> | 419.48139                                                                  | 432.22556                                                         | 548.92379                                                             | 413                         |

**Table S5.** FIA gas phase values reported in kJ/mol for different levels of theory, calculated using a 941.433411 kJ/mol TMS anchor. \*Values taken from Greb<sup>10</sup>.

| Structure (Anionic)                                                                         | Electronic Energy (a.u.) | $\Delta_g G^0$ (eV) | $T\Delta_g S$ (eV) | Electron Affinity (eV) |
|---------------------------------------------------------------------------------------------|--------------------------|---------------------|--------------------|------------------------|
| <b>1,2-(SbPh<sub>2</sub>)<sub>2</sub>-ortho-(C<sub>2</sub>B<sub>10</sub>H<sub>10</sub>)</b> | -1734.9687               | -0.649509           | 0.0831257          | 0.5661133              |
| <b>1,2-(SbPh)<sub>2</sub>-ortho-(C<sub>2</sub>B<sub>10</sub>H<sub>10</sub>)<sub>2</sub></b> | -1602.7333               | -1.282049           | 0.0323453          | 1.2494337              |
| <b>o-(C<sub>6</sub>F<sub>4</sub>)(SbPh<sub>2</sub>(diolate))<sub>2</sub></b>                | -6469.2527               | -1.748507           | 0.0604374          | 1.6878000              |
| <b>o-(C<sub>2</sub>B<sub>10</sub>H<sub>10</sub>)<sub>2</sub>(SbPh(diolate))<sub>2</sub></b> | -6039.9282               | -2.819999           | 0.039688           | 2.7800415              |
| <b>o-(C<sub>2</sub>B<sub>10</sub>H<sub>10</sub>)(SbPh<sub>2</sub>(diolate))<sub>2</sub></b> | -6172.2063               | -2.397728           | 0.0843667          | 2.3130914              |
| <b>o-(C<sub>2</sub>B<sub>10</sub>H<sub>10</sub>)(SbPh<sub>2</sub>Cl)<sub>2</sub>O</b>       | -2730.2428               | -1.804671           | 0.0838238          | 1.7205769              |

**Table S6.** Electron affinity gas phase values reported in eV, calculated at the B2PLYPD3/def2qzvpp-def2tzvp//B3LYP-D3/LANL2Dz-def2svp level of theory.

**Table S7.** Cartesian coordinates (xyz format) and energies of all the structures calculated at the B3LYP-D3/LANL2Dz-def2svp level of theory.

**1,2-(SbPh<sub>2</sub>)<sub>2</sub>-ortho-(C<sub>2</sub>B<sub>10</sub>H<sub>10</sub>)**

E(scf) = -1267.44317231 a.u.

|    |           |           |           |   |           |           |          |
|----|-----------|-----------|-----------|---|-----------|-----------|----------|
| Sb | 1.839359  | -0.372956 | -0.830776 | B | 1.311549  | -1.062786 | 2.504703 |
| Sb | -1.839361 | 0.372980  | -0.830760 | B | -1.311541 | 1.062713  | 2.504737 |
| C  | 0.831681  | -0.100295 | 1.167223  | B | 1.542733  | 0.695071  | 2.504609 |
| C  | -0.831678 | 0.100260  | 1.167228  | B | -1.542725 | -0.695144 | 2.504593 |
| C  | 3.753157  | -0.960722 | -0.017925 | B | 0.181741  | 1.421545  | 1.610044 |
| C  | -3.753156 | 0.960723  | -0.017886 | B | -0.181736 | -1.421593 | 1.610004 |

|   |           |           |           |   |           |           |           |
|---|-----------|-----------|-----------|---|-----------|-----------|-----------|
| B | 0.188952  | 1.439861  | 3.386284  | H | -3.379955 | -4.685834 | -0.040400 |
| B | -0.188942 | -1.439960 | 3.386243  | C | -2.760463 | -2.644366 | -0.367956 |
| C | 2.264245  | 1.698873  | -1.282292 | H | -2.954492 | -2.363511 | 0.667833  |
| C | -2.264249 | -1.698835 | -1.282337 | C | -4.829912 | 0.079965  | 0.166697  |
| B | 0.882863  | -0.114304 | 3.947888  | H | -4.733107 | -0.977266 | -0.086981 |
| B | -0.882851 | 0.114189  | 3.947893  | C | -6.047742 | 0.545876  | 0.674449  |
| C | 4.829915  | -0.079971 | 0.166677  | H | -6.876208 | -0.152939 | 0.817749  |
| H | 4.733109  | 0.977267  | -0.086972 | C | -6.205675 | 1.896290  | 0.998097  |
| C | 3.929348  | -2.321158 | 0.291677  | H | -7.156952 | 2.257220  | 1.397570  |
| H | 3.111913  | -3.034242 | 0.145747  | C | -5.144421 | 2.785455  | 0.802663  |
| C | 5.144424  | -2.785478 | 0.802569  | H | -5.261535 | 3.844147  | 1.048296  |
| H | 5.261539  | -3.844177 | 1.048173  | C | -3.929347 | 2.321150  | 0.291754  |
| C | 6.205679  | -1.896319 | 0.998022  | H | -3.111913 | 3.034238  | 0.145840  |
| H | 7.156958  | -2.257260 | 1.397481  | C | 2.005700  | 2.111454  | -2.601101 |
| C | 6.047746  | -0.545896 | 0.674411  | H | 1.605695  | 1.402796  | -3.333841 |
| H | 6.876214  | 0.152914  | 0.817726  | C | 2.760463  | 2.644376  | -0.367886 |
| C | -2.005711 | -2.111377 | -2.601159 | H | 2.954497  | 2.363490  | 0.667894  |
| H | -1.605710 | -1.402696 | -3.333880 | C | 2.997794  | 3.963177  | -0.766038 |
| C | -2.246095 | -3.430421 | -3.001816 | H | 3.379955  | 4.685834  | -0.040271 |
| H | -2.039544 | -3.732239 | -4.032026 | C | 2.742995  | 4.358725  | -2.083360 |
| C | -2.743004 | -4.358663 | -2.083482 | H | 2.928316  | 5.390915  | -2.391748 |
| H | -2.928328 | -5.390844 | -2.391901 | C | 2.246081  | 3.430511  | -3.001719 |
| C | -2.997796 | -3.963155 | -0.766147 | H | 2.039525  | 3.732359  | -4.031919 |

|   |           |           |          |   |           |           |          |
|---|-----------|-----------|----------|---|-----------|-----------|----------|
| H | 2.243207  | -1.797455 | 2.371668 | H | 0.283248  | 2.341887  | 0.856700 |
| H | -0.283245 | -2.341913 | 0.856634 | H | 0.318673  | 2.479183  | 3.973370 |
| H | -0.318662 | -2.479298 | 3.973300 | H | -2.243199 | 1.797386  | 2.371726 |
| H | 1.535848  | -0.201599 | 4.952142 | H | -1.535834 | 0.201456  | 4.952151 |
| H | 2.641148  | 1.151317  | 2.374552 | H | -2.641141 | -1.151387 | 2.374526 |

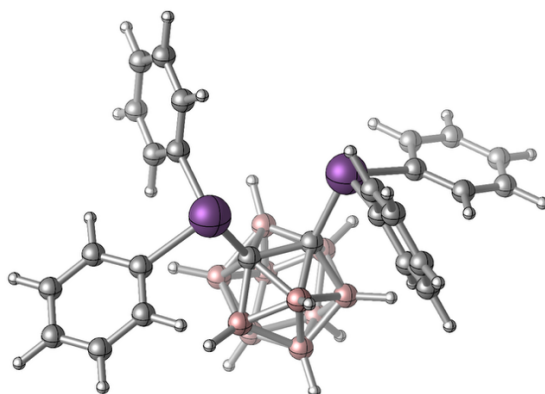

|                                              |                             |
|----------------------------------------------|-----------------------------|
| Zero-point correction=                       | 0.516328 (Hartree/Particle) |
| Thermal correction to Energy=                | 0.549657                    |
| Thermal correction to Enthalpy=              | 0.550601                    |
| Thermal correction to Gibbs Free Energy=     | 0.447881                    |
| Sum of electronic and zero-point Energies=   | -1266.926845                |
| Sum of electronic and thermal Energies=      | -1266.893515                |
| Sum of electronic and thermal Enthalpies=    | -1266.892571                |
| Sum of electronic and thermal Free Energies= | -1266.995291                |

**o-(C<sub>6</sub>F<sub>4</sub>)(SbPh<sub>2</sub>(diolate))<sub>2</sub>**

E(scf) = -6002.45784725 a.u.

|    |           |           |           |    |           |           |           |
|----|-----------|-----------|-----------|----|-----------|-----------|-----------|
| Cl | -5.552366 | 0.266790  | -2.009720 | Sb | 0.985174  | 1.800902  | -0.525219 |
| Cl | -5.552366 | -0.266790 | 2.009720  | C  | 2.788934  | -0.678872 | 0.170275  |
| C  | 2.788934  | 0.678872  | -0.170275 | C  | 4.003270  | -1.338944 | 0.334026  |
| C  | 4.003271  | 1.338943  | -0.334026 | C  | 5.225216  | -0.677371 | 0.167166  |
| C  | 5.225216  | 0.677371  | -0.167166 | C  | 1.366054  | -2.704503 | 2.398065  |
| C  | 1.366054  | 2.704503  | -2.398065 | C  | 1.170488  | 3.321898  | 0.937745  |
| C  | 1.170488  | -3.321898 | -0.937745 | C  | -1.734931 | -1.145033 | 1.107201  |
| C  | -1.734931 | 1.145033  | -1.107201 | C  | -3.126903 | -1.217268 | 1.221835  |
| C  | -3.126903 | 1.217268  | -1.221835 | C  | -3.819073 | -0.228244 | 1.945672  |
| C  | -3.819073 | 0.228244  | -1.945672 | C  | -3.103479 | 0.794928  | 2.596711  |
| C  | -3.103479 | -0.794928 | -2.596711 | C  | -1.700275 | 0.855763  | 2.485185  |
| C  | -1.700275 | -0.855763 | -2.485185 | C  | -1.026255 | -0.070850 | 1.686466  |
| C  | -1.026255 | 0.070850  | -1.686466 | Cl | -3.948536 | -2.508716 | 0.401618  |
| Cl | -3.948536 | 2.508716  | -0.401618 | Cl | -3.946001 | 2.004340  | 3.515783  |
| Cl | -3.946001 | -2.004340 | -3.515783 | Cl | -0.773077 | 2.060739  | 3.323805  |
| Cl | -0.773077 | -2.060739 | -3.323805 | F  | 4.038619  | -2.641133 | 0.646061  |
| F  | 4.038619  | 2.641133  | -0.646061 | F  | 6.373023  | -1.323068 | 0.325312  |
| F  | 6.373023  | 1.323067  | -0.325312 | O  | -1.025389 | -2.034926 | 0.406422  |
| O  | -1.025389 | 2.034926  | -0.406422 | O  | 0.297201  | 0.002069  | 1.395334  |
| O  | 0.297201  | -0.002069 | -1.395334 | Sb | 0.985174  | -1.800902 | 0.525219  |

|   |           |          |           |   |           |           |           |
|---|-----------|----------|-----------|---|-----------|-----------|-----------|
| C | 1.864663  | 3.899524 | -4.877307 | C | 2.287021  | -4.292433 | -2.854834 |
| H | 2.057672  | 4.366763 | -5.846421 | H | 3.081386  | -4.255154 | -3.604489 |
| C | 1.944567  | 4.660936 | -3.706958 | C | 2.194703  | -3.285090 | -1.890633 |
| H | 2.201487  | 5.721989 | -3.758021 | H | 2.909950  | -2.459778 | -1.912164 |
| C | 1.694904  | 4.066399 | -2.466774 | C | 0.231253  | -4.364837 | -0.953420 |
| H | 1.761945  | 4.668283 | -1.556409 | H | -0.599969 | -4.370385 | -0.245903 |
| C | 1.289111  | 1.938730 | -3.572371 | C | 0.333107  | -5.373041 | -1.915080 |
| H | 1.035037  | 0.877398 | -3.523860 | H | -0.402795 | -6.180742 | -1.930887 |
| C | 1.537942  | 2.541548 | -4.809181 | C | 1.358090  | -5.337315 | -2.865676 |
| H | 1.473291  | 1.945781 | -5.723193 | H | 1.428082  | -6.121840 | -3.623479 |
| C | 0.231253  | 4.364837 | 0.953420  | C | 1.289111  | -1.938730 | 3.572371  |
| H | -0.599969 | 4.370385 | 0.245903  | H | 1.035037  | -0.877398 | 3.523860  |
| C | 2.194703  | 3.285090 | 1.890633  | C | 1.537942  | -2.541548 | 4.809181  |
| H | 2.909950  | 2.459778 | 1.912164  | H | 1.473291  | -1.945781 | 5.723193  |
| C | 2.287021  | 4.292433 | 2.854834  | C | 1.864663  | -3.899524 | 4.877307  |
| H | 3.081386  | 4.255154 | 3.604489  | H | 2.057672  | -4.366763 | 5.846421  |
| C | 1.358090  | 5.337315 | 2.865676  | C | 1.944567  | -4.660936 | 3.706958  |
| H | 1.428082  | 6.121840 | 3.623479  | H | 2.201487  | -5.721989 | 3.758021  |
| C | 0.333107  | 5.373041 | 1.915080  | C | 1.694904  | -4.066399 | 2.466774  |
| H | -0.402795 | 6.180742 | 1.930887  | H | 1.761944  | -4.668283 | 1.556409  |

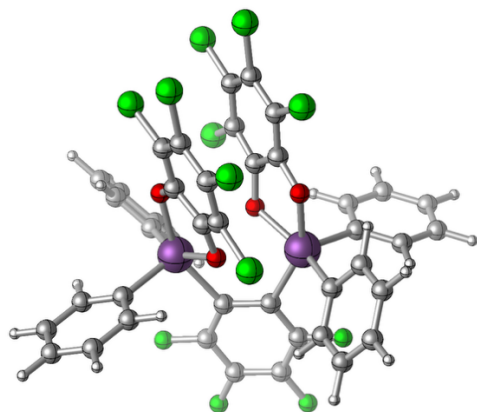

|                                              |                             |
|----------------------------------------------|-----------------------------|
| Zero-point correction=                       | 0.509703 (Hartree/Particle) |
| Thermal correction to Energy=                | 0.565679                    |
| Thermal correction to Enthalpy=              | 0.566623                    |
| Thermal correction to Gibbs Free Energy=     | 0.414217                    |
| Sum of electronic and zero-point Energies=   | -6001.948144                |
| Sum of electronic and thermal Energies=      | -6001.892169                |
| Sum of electronic and thermal Enthalpies=    | -6001.891224                |
| Sum of electronic and thermal Free Energies= | -6002.043630                |

**1,2-(SbPh)<sub>2</sub>-ortho-(C<sub>2</sub>B<sub>10</sub>H<sub>10</sub>)<sub>2</sub>**

E(scf) = -1135.14196085 a.u.

|    |           |           |           |   |           |           |           |
|----|-----------|-----------|-----------|---|-----------|-----------|-----------|
| Sb | -2.128588 | 0.000045  | -1.057140 | B | -0.891131 | -4.478759 | -0.051695 |
| C  | -0.828985 | -1.727407 | -0.485126 | B | -1.434960 | -3.192659 | -1.153203 |
| C  | -0.828918 | 1.727441  | -0.485111 | B | -1.438161 | -2.913878 | 0.601675  |
| C  | -3.395215 | 0.000052  | 0.681296  | B | -1.434838 | 3.192720  | -1.153175 |

|    |           |           |           |   |           |           |           |
|----|-----------|-----------|-----------|---|-----------|-----------|-----------|
| B  | -1.438043 | 2.913926  | 0.601701  | C | 3.861915  | -0.000065 | 3.065091  |
| B  | -0.000044 | -1.940045 | 0.999981  | H | 3.499974  | -0.000074 | 4.096274  |
| B  | -0.000079 | -3.695606 | 1.294915  | C | 2.946123  | -0.000068 | 2.011988  |
| B  | -0.000073 | -4.159476 | -1.574320 | H | 1.880782  | -0.000079 | 2.238810  |
| B  | -0.000038 | -2.402701 | -1.834695 | C | 5.237187  | -0.000049 | 2.803409  |
| B  | 0.000038  | 1.940035  | 0.999994  | H | 5.951276  | -0.000046 | 3.630794  |
| Sb | 2.128596  | -0.000040 | -1.057124 | C | 5.694711  | -0.000037 | 1.484216  |
| C  | 0.828922  | -1.727440 | -0.485118 | H | 6.766915  | -0.000025 | 1.272708  |
| C  | 0.828989  | 1.727408  | -0.485108 | C | 4.776755  | -0.000041 | 0.427431  |
| B  | 0.890956  | -4.478794 | -0.051685 | H | 5.155396  | -0.000031 | -0.599983 |
| B  | 1.434847  | -3.192715 | -1.153188 | C | 3.395209  | -0.000055 | 0.681323  |
| B  | 1.438040  | -2.913934 | 0.601690  | B | 1.434969  | 3.192665  | -1.153171 |
| B  | 1.438157  | 2.913871  | 0.601705  | B | 0.000051  | 2.402711  | -1.834678 |
| C  | -5.237211 | 0.000044  | 2.803367  | B | 0.000085  | 4.159485  | -1.574290 |
| H  | -5.951307 | 0.000040  | 3.630746  | B | 0.891132  | 4.478757  | -0.051657 |
| C  | -5.694724 | 0.000050  | 1.484170  | B | 0.000072  | 3.695594  | 1.294941  |
| H  | -6.766926 | 0.000051  | 1.272653  | B | -0.890954 | 4.478792  | -0.051659 |
| C  | -4.776759 | 0.000055  | 0.427393  | H | 0.000101  | 4.901158  | -2.516916 |
| H  | -5.155392 | 0.000059  | -0.600024 | H | 2.457010  | 3.129882  | -1.778735 |
| C  | -2.946140 | 0.000046  | 2.011965  | H | 0.000041  | 1.790918  | -2.864475 |
| H  | -1.880802 | 0.000043  | 2.238796  | H | -0.000021 | -1.790899 | -2.864487 |
| C  | -3.861941 | 0.000042  | 3.065060  | H | -0.000083 | -4.901143 | -2.516951 |
| H  | -3.500009 | 0.000037  | 4.096247  | H | -2.456997 | -3.129872 | -1.778774 |

|   |           |           |          |   |           |           |           |
|---|-----------|-----------|----------|---|-----------|-----------|-----------|
| H | -1.552691 | -5.466898 | 0.110142 | H | -2.458483 | 2.681786  | 1.175515  |
| H | -0.000093 | -4.108963 | 2.421134 | H | -2.456880 | 3.129978  | -1.778743 |
| H | 1.552691  | 5.466894  | 0.110192 | H | -2.458593 | -2.681702 | 1.175487  |
| H | 2.458586  | 2.681691  | 1.175523 | H | -0.000031 | -1.065994 | 1.804929  |
| H | -1.552476 | 5.466954  | 0.110187 | H | 2.458476  | -2.681798 | 1.175513  |
| H | 0.000078  | 4.108942  | 2.421164 | H | 1.552476  | -5.466958 | 0.110158  |
| H | 0.000020  | 1.065978  | 1.804936 | H | 2.456893  | -3.129968 | -1.778748 |

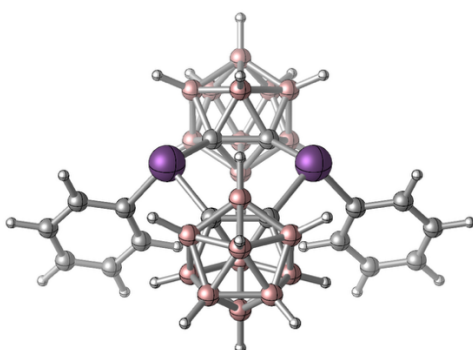

|                                              |                             |
|----------------------------------------------|-----------------------------|
| Zero-point correction=                       | 0.488680 (Hartree/Particle) |
| Thermal correction to Energy=                | 0.519598                    |
| Thermal correction to Enthalpy=              | 0.520542                    |
| Thermal correction to Gibbs Free Energy=     | 0.427421                    |
| Sum of electronic and zero-point Energies=   | -1134.653280                |
| Sum of electronic and thermal Energies=      | -1134.622363                |
| Sum of electronic and thermal Enthalpies=    | -1134.621419                |
| Sum of electronic and thermal Free Energies= | -1134.714540                |

**o-(C<sub>2</sub>B<sub>10</sub>H<sub>10</sub>)(SbPh<sub>2</sub>(diolate))<sub>2</sub>**

E(scf) = -5705.62910118 a.u.

|    |           |           |           |    |           |           |           |
|----|-----------|-----------|-----------|----|-----------|-----------|-----------|
| Sb | 0.557974  | 2.087580  | -0.347523 | Cl | -5.107516 | -1.826569 | 1.793748  |
| B  | 3.079878  | 0.435655  | -1.902286 | B  | 5.331779  | 1.988422  | -0.964962 |
| Cl | -4.442563 | 1.739984  | 0.095756  | Cl | -3.073233 | -3.355499 | -0.134562 |
| O  | -1.475053 | 1.938010  | -0.130778 | B  | 5.204076  | 1.221331  | 0.649789  |
| C  | 2.661766  | 1.355067  | -0.482858 | C  | 0.600768  | 3.479862  | -1.940781 |
| Sb | 1.555707  | -1.724805 | 0.315720  | B  | 4.594502  | -0.435697 | 0.398074  |
| B  | 3.691136  | 2.091614  | -1.654771 | C  | 0.520988  | 3.341472  | 1.385175  |
| Cl | -5.655789 | -0.533531 | -1.787100 | B  | 5.736738  | 0.264994  | -0.770109 |
| O  | 0.130249  | 0.477863  | -1.571026 | C  | -3.429996 | 0.804050  | -0.960214 |
| C  | 3.041098  | -0.227180 | -0.310812 | C  | -2.052903 | 1.042528  | -0.933596 |
| Cl | -3.715410 | -2.202494 | -3.651482 | C  | -3.950789 | -0.205813 | -1.796325 |
| B  | 3.941983  | 2.350189  | 0.082861  | C  | -3.088424 | -0.953919 | -2.619629 |
| O  | 0.469768  | -0.040731 | 1.168825  | C  | -1.701525 | -0.707811 | -2.588237 |
| O  | -0.352879 | -2.186439 | -0.064605 | C  | -1.186075 | 0.261443  | -1.728870 |
| Cl | -0.579375 | -1.587793 | -3.585940 | C  | 2.121657  | -3.388023 | -0.896196 |
| B  | 3.497658  | 0.856525  | 0.939089  | C  | 2.006456  | -2.359137 | 2.289850  |
| Cl | -0.976523 | 1.337908  | 3.475252  | C  | -0.787469 | -0.463022 | 1.465298  |
| B  | 4.344508  | -0.681437 | -1.344988 | C  | -1.622491 | 0.118837  | 2.423966  |
| Cl | -4.024557 | 0.489571  | 3.652126  | C  | -2.962972 | -0.302965 | 2.531116  |
| B  | 4.792534  | 0.806005  | -2.194972 | C  | -3.442327 | -1.352643 | 1.723812  |

|   |           |           |           |   |          |           |           |
|---|-----------|-----------|-----------|---|----------|-----------|-----------|
| C | -2.564974 | -2.019317 | 0.847712  | H | 1.006656 | 5.193413  | -0.667042 |
| C | -1.244693 | -1.578540 | 0.737149  | C | 0.403343 | 3.038810  | -3.258780 |
| C | 2.443165  | -3.676215 | 2.504315  | H | 0.231159 | 1.981279  | -3.467136 |
| H | 2.565627  | -4.370191 | 1.670650  | C | 0.447497 | 3.955486  | -4.312632 |
| C | 2.715330  | -4.117451 | 3.802711  | H | 0.292552 | 3.608471  | -5.337279 |
| H | 3.054630  | -5.143565 | 3.963759  | C | 0.693932 | 5.308595  | -4.058824 |
| C | 2.547388  | -3.252013 | 4.887205  | H | 0.731686 | 6.021809  | -4.886193 |
| H | 2.759586  | -3.599522 | 5.901423  | C | 0.894327 | 5.748644  | -2.747158 |
| C | 2.096082  | -1.945815 | 4.675198  | H | 1.089902 | 6.804772  | -2.545226 |
| H | 1.945942  | -1.270749 | 5.521180  | C | 3.417244 | -3.919129 | -0.774155 |
| C | 1.821813  | -1.494452 | 3.381842  | H | 4.151785 | -3.467055 | -0.104237 |
| H | 1.445602  | -0.482279 | 3.233792  | C | 1.194840 | -3.996501 | -1.755397 |
| C | 1.492131  | 3.365293  | 2.392249  | H | 0.181381 | -3.607852 | -1.842568 |
| H | 2.350420  | 2.700934  | 2.363641  | C | 1.575065 | -5.117900 | -2.500291 |
| C | 1.351476  | 4.230999  | 3.480828  | H | 0.850813 | -5.583004 | -3.173607 |
| H | 2.112425  | 4.234954  | 4.265177  | C | 2.865080 | -5.641690 | -2.383547 |
| C | 0.243631  | 5.077544  | 3.569416  | H | 3.155264 | -6.518862 | -2.967447 |
| H | 0.133544  | 5.749269  | 4.424518  | C | 3.784381 | -5.045838 | -1.514260 |
| C | -0.726565 | 5.057187  | 2.563844  | H | 4.793284 | -5.453176 | -1.413236 |
| H | -1.601803 | 5.708239  | 2.628988  | H | 2.239693 | 0.129853  | -2.682541 |
| C | -0.594483 | 4.192380  | 1.474582  | H | 5.210488 | 0.775003  | -3.318438 |
| H | -1.381571 | 4.160366  | 0.720277  | H | 4.348448 | -1.771541 | -1.821555 |
| C | 0.846436  | 4.837185  | -1.687797 | H | 4.748142 | -1.368251 | 1.133999  |

|   |          |           |           |   |          |          |           |
|---|----------|-----------|-----------|---|----------|----------|-----------|
| H | 6.850167 | -0.172044 | -0.867235 | H | 3.246121 | 2.965646 | -2.331997 |
| H | 5.912942 | 1.490220  | 1.579341  | H | 3.661293 | 3.402990 | 0.572018  |
| H | 6.147214 | 2.834662  | -1.206787 | H | 2.911379 | 0.800190 | 1.969726  |

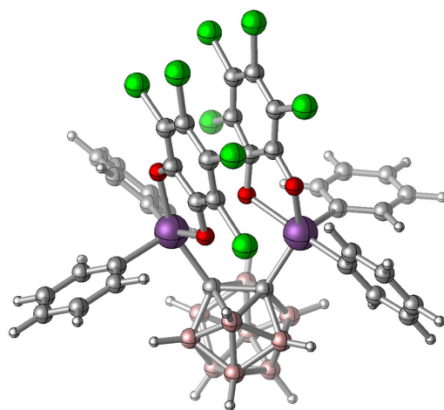

|                                              |                             |
|----------------------------------------------|-----------------------------|
| Zero-point correction=                       | 0.618116 (Hartree/Particle) |
| Thermal correction to Energy=                | 0.673835                    |
| Thermal correction to Enthalpy=              | 0.674779                    |
| Thermal correction to Gibbs Free Energy=     | 0.527780                    |
| Sum of electronic and zero-point Energies=   | -5705.010985                |
| Sum of electronic and thermal Energies=      | -5704.955267                |
| Sum of electronic and thermal Enthalpies=    | -5704.954322                |
| Sum of electronic and thermal Free Energies= | -5705.101321                |

**o-(C<sub>2</sub>B<sub>10</sub>H<sub>10</sub>)<sub>2</sub>(SbPh(diolate))<sub>2</sub>**

E(scf) = -5573.27371834 a.u.

|    |           |           |           |    |           |           |           |
|----|-----------|-----------|-----------|----|-----------|-----------|-----------|
| Cl | 7.652330  | 2.161432  | -0.761629 | B  | 0.201495  | -0.721630 | 4.270784  |
| Cl | 6.191483  | -2.950290 | 0.614593  | B  | -0.870829 | 0.491688  | 3.514036  |
| Cl | 8.468758  | -0.751989 | 0.167101  | B  | 0.110840  | 1.925800  | 3.126577  |
| Sb | 1.596323  | -1.073131 | -0.244393 | B  | 1.793469  | 1.619157  | 3.609798  |
| Cl | 4.555851  | 2.840332  | -1.242619 | B  | 1.853432  | -0.019728 | 4.333067  |
| O  | 3.443890  | -1.859107 | 0.078769  | B  | 0.433927  | 1.018358  | 4.618026  |
| O  | 2.800679  | 0.493173  | -0.708822 | Sb | -1.756317 | 1.357493  | 0.399039  |
| C  | 1.060638  | -0.241839 | 1.687878  | Cl | -3.710505 | -3.182197 | 1.351601  |
| C  | -0.249380 | 0.739700  | 1.937043  | O  | -3.721078 | 1.632738  | -0.049421 |
| C  | -1.658350 | 3.479032  | 0.619125  | O  | -2.544408 | -0.465162 | 0.843702  |
| C  | 4.467560  | -1.005272 | -0.095134 | C  | -0.996115 | 0.868452  | -1.573487 |
| C  | 5.807964  | -1.335208 | 0.109964  | C  | 0.303993  | -0.129206 | -1.814613 |
| C  | 6.799921  | -0.351762 | -0.097578 | C  | 0.911553  | -3.088178 | -0.391495 |
| C  | 6.437752  | 0.945710  | -0.514602 | C  | -4.480693 | 0.529813  | 0.020658  |
| C  | 5.081221  | 1.264788  | -0.732751 | C  | -5.824651 | 0.483209  | -0.354510 |
| C  | 4.110272  | 0.286137  | -0.522536 | C  | -6.537907 | -0.727834 | -0.224386 |
| B  | 1.317986  | 1.451550  | 1.908562  | C  | -5.899145 | -1.873918 | 0.290821  |
| B  | 2.397301  | 0.242458  | 2.658994  | C  | -4.542038 | -1.813916 | 0.670968  |
| B  | 1.425165  | -1.194173 | 3.065347  | C  | -3.838462 | -0.619008 | 0.517926  |
| B  | -0.257770 | -0.892919 | 2.572181  | B  | -1.282022 | -0.730126 | -2.142185 |

|    |           |           |           |   |           |           |           |
|----|-----------|-----------|-----------|---|-----------|-----------|-----------|
| B  | -2.187506 | 0.660735  | -2.801052 | H | 0.467772  | 3.618814  | 0.160529  |
| B  | -1.102924 | 2.076378  | -2.781077 | C | -2.823156 | 4.190156  | 0.941306  |
| B  | 0.477124  | 1.568530  | -2.120321 | H | -3.775135 | 3.674422  | 1.065318  |
| B  | 0.266382  | 1.748240  | -3.871702 | C | -0.400243 | 5.543619  | 0.538658  |
| B  | 1.162171  | 0.348407  | -3.230268 | H | 0.544621  | 6.066056  | 0.372363  |
| B  | 0.079156  | -1.065358 | -3.233725 | C | -1.555132 | 6.257517  | 0.872471  |
| B  | -1.499175 | -0.562606 | -3.892553 | H | -1.514700 | 7.344840  | 0.973017  |
| B  | -1.382580 | 1.182008  | -4.297274 | C | -2.761449 | 5.581209  | 1.071630  |
| B  | 0.015882  | 0.113814  | -4.569597 | H | -3.668428 | 6.135617  | 1.324237  |
| Cl | -6.553005 | 1.929033  | -0.974799 | H | -0.406346 | 2.995109  | 3.022334  |
| Cl | -8.204815 | -0.794954 | -0.702084 | H | 1.649606  | 2.095020  | 0.967465  |
| Cl | -6.771197 | -3.364996 | 0.462028  | H | 2.519129  | 2.517244  | 3.930539  |
| C  | 1.813590  | -4.089521 | -0.784844 | H | 3.495486  | 0.127418  | 2.208926  |
| H  | 2.863572  | -3.856249 | -0.960655 | H | 2.640973  | -0.313064 | 5.187934  |
| C  | 1.357681  | -5.403605 | -0.922298 | H | 1.859680  | -2.291041 | 2.869184  |
| H  | 2.058422  | -6.183530 | -1.229804 | H | -0.219914 | -1.508572 | 5.070159  |
| C  | 0.020290  | -5.719007 | -0.664571 | H | 0.169846  | 1.499666  | 5.684142  |
| H  | -0.329843 | -6.748120 | -0.776584 | H | -2.054326 | 0.587643  | 3.668451  |
| C  | -0.867877 | -4.720486 | -0.256792 | H | -0.937910 | -1.723751 | 2.080243  |
| H  | -1.912779 | -4.954043 | -0.042524 | H | 1.114891  | 2.229198  | -1.370227 |
| C  | -0.427988 | -3.400964 | -0.120045 | H | 0.831878  | 2.637118  | -4.442611 |
| H  | -1.141872 | -2.647982 | 0.209841  | H | 2.346144  | 0.203578  | -3.249721 |
| C  | -0.444912 | 4.153093  | 0.416983  | H | 0.527099  | -2.174860 | -3.235955 |

|   |           |           |           |   |           |           |           |
|---|-----------|-----------|-----------|---|-----------|-----------|-----------|
| H | 0.416380  | -0.183413 | -5.660091 | H | -2.020151 | 1.677496  | -5.183549 |
| H | -2.206312 | -1.336633 | -4.472992 | H | -1.515576 | 3.148939  | -2.451263 |
| H | -3.334765 | 0.775498  | -2.495495 | H | -1.778998 | -1.515499 | -1.408114 |

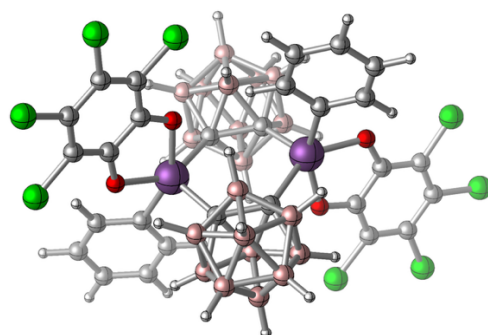

|                                              |                             |
|----------------------------------------------|-----------------------------|
| Zero-point correction=                       | 0.588815 (Hartree/Particle) |
| Thermal correction to Energy=                | 0.643137                    |
| Thermal correction to Enthalpy=              | 0.644081                    |
| Thermal correction to Gibbs Free Energy=     | 0.499990                    |
| Sum of electronic and zero-point Energies=   | -5572.684903                |
| Sum of electronic and thermal Energies=      | -5572.630581                |
| Sum of electronic and thermal Enthalpies=    | -5572.629637                |
| Sum of electronic and thermal Free Energies= | -5572.773728                |

**o-(C<sub>2</sub>B<sub>10</sub>H<sub>10</sub>)(SbPh<sub>2</sub>Cl)<sub>2</sub>O**

E(scf) = -2262.80282225 a.u.

|    |           |           |           |   |           |           |           |
|----|-----------|-----------|-----------|---|-----------|-----------|-----------|
| C  | 2.576067  | -4.309539 | -1.621953 | C | 2.011396  | -1.987565 | -1.256941 |
| H  | 2.960985  | -5.258734 | -1.241065 | C | 2.521362  | -3.197758 | -0.774344 |
| C  | 2.150452  | -4.205689 | -2.949513 | H | 2.889934  | -3.274094 | 0.250003  |
| H  | 2.205038  | -5.074501 | -3.610463 | C | 1.576840  | -1.879992 | -2.586668 |
| C  | 1.660694  | -2.988027 | -3.434490 | H | 1.157789  | -0.941786 | -2.955787 |
| H  | 1.334238  | -2.900537 | -4.473869 | C | -2.011278 | 1.987511  | -1.256462 |
| C  | -3.391738 | -4.145682 | -1.516178 | C | -1.577752 | 1.879659  | -2.586497 |
| H  | -3.726720 | -5.133487 | -1.843209 | H | -1.159522 | 0.941203  | -2.955921 |
| C  | -4.246219 | -3.330718 | -0.766899 | C | -1.661594 | 2.987723  | -3.434285 |
| H  | -5.249101 | -3.678372 | -0.506775 | H | -1.335950 | 2.900025  | -4.473902 |
| C  | -3.825221 | -2.067377 | -0.340043 | C | -2.150303 | 4.205674  | -2.948976 |
| H  | -4.494025 | -1.436273 | 0.246509  | H | -2.204874 | 5.074504  | -3.609905 |
| Sb | 1.798374  | -0.265538 | -0.022706 | C | -2.574905 | 4.309793  | -1.621113 |
| Sb | -1.798291 | 0.265463  | -0.022277 | H | -2.959014 | 5.259213  | -1.239969 |
| Cl | 3.924132  | -0.886184 | 1.129743  | C | -2.520222 | 3.197996  | -0.773523 |
| Cl | -3.923593 | 0.886702  | 1.130696  | H | -2.888026 | 3.274557  | 0.251085  |
| O  | -0.000087 | -0.000273 | -0.791826 | C | -2.537123 | -1.622005 | -0.668524 |
| C  | 0.815389  | -0.163673 | 1.940494  | C | -1.679121 | -2.435909 | -1.421365 |
| C  | 1.678495  | 2.435333  | -1.422661 | H | -0.678077 | -2.091403 | -1.668837 |
| H  | 0.677824  | 2.090139  | -1.670692 | C | -2.109127 | -3.696483 | -1.843922 |

|   |           |           |           |   |           |           |          |
|---|-----------|-----------|-----------|---|-----------|-----------|----------|
| H | -1.430686 | -4.324908 | -2.426489 | H | 2.119796  | -1.951804 | 3.110885 |
| B | 0.277959  | 1.415364  | 2.360421  | B | -0.277324 | -1.415647 | 2.360267 |
| H | 0.455616  | 2.304439  | 1.580715  | H | -0.455140 | -2.304601 | 1.580462 |
| C | -0.814842 | 0.163452  | 1.940690  | B | -1.242166 | 1.157064  | 3.261280 |
| C | 2.536513  | 1.622157  | -0.669054 | H | -2.118984 | 1.951419  | 3.111662 |
| C | 3.824105  | 2.068428  | -0.339814 | B | 0.284548  | 1.426521  | 4.135534 |
| H | 4.492950  | 1.437865  | 0.247274  | H | 0.488140  | 2.450975  | 4.725562 |
| C | 4.244558  | 3.331961  | -0.766641 | B | 0.874364  | -0.173260 | 4.696291 |
| H | 5.247033  | 3.680330  | -0.505907 | H | 1.515497  | -0.300667 | 5.702536 |
| C | 3.390052  | 4.146205  | -1.516675 | B | -0.283536 | -1.427084 | 4.135373 |
| H | 3.724607  | 5.134162  | -1.843682 | H | -0.487003 | -2.451629 | 4.725284 |
| C | 2.107964  | 3.696091  | -1.845210 | B | -1.589841 | -0.593629 | 3.257349 |
| H | 1.429503  | 4.323947  | -2.428368 | H | -2.704384 | -0.991191 | 3.100148 |
| B | 1.590663  | 0.593212  | 3.257107  | B | -0.873231 | 0.172612  | 4.696503 |
| H | 2.705167  | 0.990809  | 3.099747  | H | -1.514150 | 0.299867  | 5.702904 |
| B | 1.242999  | -1.157483 | 3.260833  |   |           |           |          |

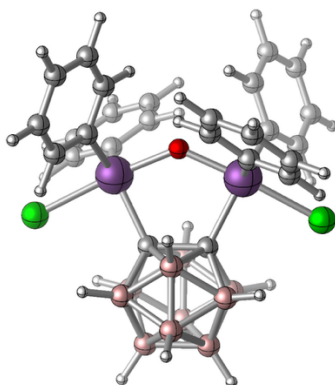

|                                              |                             |
|----------------------------------------------|-----------------------------|
| Zero-point correction=                       | 0.524022 (Hartree/Particle) |
| Thermal correction to Energy=                | 0.561129                    |
| Thermal correction to Enthalpy=              | 0.562073                    |
| Thermal correction to Gibbs Free Energy=     | 0.452863                    |
| Sum of electronic and zero-point Energies=   | -2262.278800                |
| Sum of electronic and thermal Energies=      | -2262.241694                |
| Sum of electronic and thermal Enthalpies=    | -2262.240749                |
| Sum of electronic and thermal Free Energies= | -2262.349959                |

***o*-(C<sub>2</sub>B<sub>10</sub>H<sub>10</sub>)(SbPh<sub>2</sub>(diolate))<sub>2</sub>\_FIA**

E(scf) = -5805.56517262 a.u.

|    |           |           |           |    |           |          |           |
|----|-----------|-----------|-----------|----|-----------|----------|-----------|
| H  | -4.150060 | -6.525964 | -2.614818 | H  | -4.171299 | 4.409605 | 1.118353  |
| Cl | -5.960247 | 2.023027  | 2.131271  | C  | -2.834592 | 4.087511 | -0.552739 |
| Cl | -4.977384 | 1.223446  | -0.806239 | H  | -3.442980 | 4.659003 | -1.258413 |
| C  | -3.238460 | 3.955025  | 0.777727  | Cl | -4.424125 | 0.858455 | 4.642657  |

|    |           |           |           |   |           |           |           |
|----|-----------|-----------|-----------|---|-----------|-----------|-----------|
| Cl | 4.426294  | -0.742220 | 4.661447  | C | -2.910866 | -0.546334 | 2.848195  |
| C  | -3.367614 | -3.286261 | -1.863705 | C | -3.979448 | 0.359422  | 3.029747  |
| C  | -4.113512 | -4.383796 | -2.302992 | C | -4.648046 | 0.891908  | 1.916183  |
| H  | -5.131167 | -4.230842 | -2.672639 | C | -4.223547 | 0.555532  | 0.614303  |
| C  | -3.564376 | -5.669406 | -2.269296 | C | -3.147050 | -0.315052 | 0.435858  |
| C  | -2.266978 | -5.856227 | -1.785366 | C | -2.057169 | -3.465363 | -1.389720 |
| H  | -1.833044 | -6.859157 | -1.745206 | H | -3.804386 | -2.286818 | -1.882224 |
| C  | -1.517563 | -4.759480 | -1.345364 | C | 0.888300  | -2.708865 | -0.039785 |
| H  | -0.510628 | -4.927833 | -0.958110 | C | 1.661200  | -3.491921 | -0.909532 |
| Sb | -0.932904 | -1.782870 | -0.672547 | H | 1.368371  | -3.624303 | -1.952987 |
| Sb | 0.932387  | 1.765270  | -0.716570 | C | 2.834494  | -4.099870 | -0.452305 |
| Cl | -2.031331 | -1.213170 | 4.195251  | H | 3.442775  | -4.688583 | -1.143772 |
| Cl | 4.977285  | -1.242879 | -0.776883 | C | 3.238857  | -3.934167 | 0.874284  |
| Cl | 5.961398  | -1.968960 | 2.179185  | H | 4.171983  | -4.379824 | 1.225747  |
| Cl | 2.032989  | 1.317239  | 4.163587  | C | 2.469049  | -3.157139 | 1.743803  |
| F  | -0.000138 | 0.000569  | 0.069214  | H | 2.796060  | -3.003422 | 2.774626  |
| O  | -1.549520 | -1.784988 | 1.295734  | C | 1.299961  | -2.538560 | 1.291414  |
| O  | -2.641327 | -0.622460 | -0.750560 | H | 0.708490  | -1.927014 | 1.973600  |
| O  | 2.640820  | 0.603329  | -0.766266 | C | 3.147054  | 0.325652  | 0.427243  |
| O  | 1.549528  | 1.816186  | 1.250891  | C | 4.223837  | -0.539968 | 0.626879  |
| C  | -0.406655 | -0.766963 | -2.596926 | C | 4.648939  | -0.843730 | 1.936555  |
| C  | 0.406022  | 0.702045  | -2.615115 | C | 3.980742  | -0.283738 | 3.036786  |
| C  | -2.521402 | -0.920013 | 1.558332  | C | 2.911900  | 0.617011  | 2.833170  |

|   |          |          |           |   |           |          |           |
|---|----------|----------|-----------|---|-----------|----------|-----------|
| C | 2.521720 | 0.958238 | 1.534558  | H | 4.148709  | 6.458969 | -2.776621 |
| C | 2.056262 | 3.429547 | -1.475593 | C | 2.265812  | 5.809870 | -1.930505 |
| C | 3.366653 | 3.238850 | -1.945184 | H | 1.831794  | 6.813450 | -1.915187 |
| H | 3.803503 | 2.239292 | -1.938920 | C | 1.516565  | 4.724325 | -1.463283 |
| C | 4.112396 | 4.325199 | -2.411695 | H | 0.509691  | 4.902170 | -1.080149 |
| H | 5.130013 | 4.163199 | -2.777572 | C | -0.888620 | 2.706663 | -0.106454 |
| C | 3.563151 | 5.611204 | -2.409852 | C | -1.299857 | 2.569573 | 1.228703  |

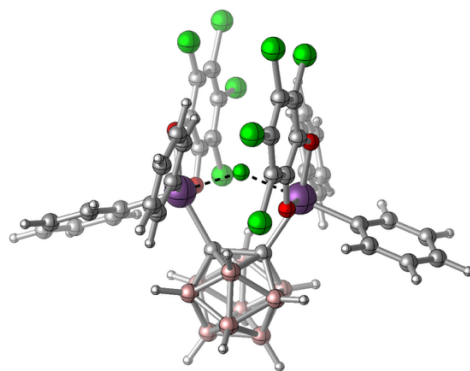

|                                              |                             |
|----------------------------------------------|-----------------------------|
| Zero-point correction=                       | 0.619466 (Hartree/Particle) |
| Thermal correction to Energy=                | 0.676519                    |
| Thermal correction to Enthalpy=              | 0.677463                    |
| Thermal correction to Gibbs Free Energy=     | 0.527656                    |
| Sum of electronic and zero-point Energies=   | -5804.945706                |
| Sum of electronic and thermal Energies=      | -5804.888654                |
| Sum of electronic and thermal Enthalpies=    | -5804.887710                |
| Sum of electronic and thermal Free Energies= | -5805.037516                |

**o-(C<sub>2</sub>B<sub>10</sub>H<sub>10</sub>)<sub>2</sub>(SbPh(diolate))<sub>2</sub>\_FIA**

E(scf) = -5673.22371084 a.u.

|    |           |           |           |    |           |           |           |
|----|-----------|-----------|-----------|----|-----------|-----------|-----------|
| H  | -4.096449 | 7.007281  | 1.341018  | Cl | 5.463845  | -1.307798 | -1.346572 |
| H  | -5.417382 | 4.907034  | 1.079909  | Cl | 5.231368  | -2.291289 | 1.655659  |
| C  | -3.583961 | 6.056348  | 1.172104  | Cl | 2.338735  | -2.907748 | 2.870945  |
| C  | -4.326138 | 4.880305  | 1.026326  | F  | -0.131861 | -0.000005 | 0.000002  |
| H  | -5.410806 | 0.480074  | -3.563534 | O  | 0.181843  | 2.712048  | -0.795524 |
| C  | -4.325869 | -4.880497 | -1.026351 | O  | 0.375465  | 2.039338  | 1.659585  |
| C  | -3.583632 | -6.056501 | -1.172133 | O  | 0.181987  | -2.712016 | 0.795537  |
| H  | -4.096072 | -7.007459 | -1.341054 | O  | 0.375591  | -2.039307 | -1.659578 |
| C  | -2.187725 | -6.018305 | -1.098961 | C  | -2.046671 | 0.478689  | 1.972186  |
| H  | -1.605577 | -6.936887 | -1.209076 | C  | -2.169466 | -1.113368 | 1.559361  |
| C  | -1.530192 | -4.804151 | -0.879791 | C  | -2.046623 | -0.478774 | -1.972194 |
| H  | -0.440918 | -4.775752 | -0.809434 | C  | 1.423897  | 2.468131  | -0.371506 |
| H  | -5.417112 | -4.907280 | -1.079938 | C  | 1.530027  | 2.082810  | 0.986194  |
| Sb | -1.222799 | 1.819009  | 0.394982  | C  | 2.762819  | 1.669128  | 1.496998  |
| Sb | -1.222687 | -1.819044 | -0.394981 | C  | 3.914805  | 1.742510  | 0.682955  |
| Cl | 2.816856  | 1.033898  | 3.114258  | C  | 3.810921  | 2.161050  | -0.656745 |
| Cl | 5.463742  | 1.307991  | 1.346586  | C  | 2.549848  | 2.489379  | -1.196462 |
| Cl | 5.231239  | 2.291477  | -1.655645 | C  | 1.424032  | -2.468054 | 0.371519  |
| Cl | 2.338590  | 2.907862  | -2.870930 | C  | 1.530152  | -2.082734 | -0.986182 |
| Cl | 2.816949  | -1.033779 | -3.114244 | C  | 2.762931  | -1.669013 | -1.496984 |

|   |           |           |           |   |           |           |          |
|---|-----------|-----------|-----------|---|-----------|-----------|----------|
| C | 3.914919  | -1.742359 | -0.682941 | B | -3.517555 | -1.828351 | 2.355687 |
| C | 3.811047  | -2.160900 | 0.656760  | H | -4.132109 | -2.684591 | 1.790885 |
| C | 2.549983  | -2.489264 | 1.196477  | B | -3.140747 | -1.740992 | 4.098422 |
| C | -2.274421 | -3.625186 | -0.739593 | H | -3.543985 | -2.583862 | 4.855468 |
| C | -3.673313 | -3.663251 | -0.811122 | B | -2.984745 | -0.021972 | 4.547571 |
| B | -1.611921 | -0.667484 | -3.638289 | H | -3.281798 | 0.407760  | 5.630753 |
| H | -0.906199 | -1.579611 | -3.944522 | B | -1.611993 | 0.667425  | 3.638284 |
| B | -0.906229 | 0.634876  | -2.655028 | H | -0.906325 | 1.579593  | 3.944521 |
| H | 0.218453  | 0.616983  | -2.298134 | B | -1.861402 | -2.121250 | 2.924027 |
| H | -0.739106 | 1.296643  | -5.132937 | H | -1.341295 | -3.178357 | 2.744796 |
| B | -0.906220 | -0.634896 | 2.655030  | C | -2.274626 | 3.625097  | 0.739581 |
| H | 0.218465  | -0.616940 | 2.298146  | C | -1.530456 | 4.804100  | 0.879774 |
| B | -1.517490 | -1.000956 | 4.268326  | H | -0.441181 | 4.775756  | 0.809418 |
| H | -0.739079 | -1.296650 | 5.132941  | C | -2.188052 | 6.018222  | 1.098935 |

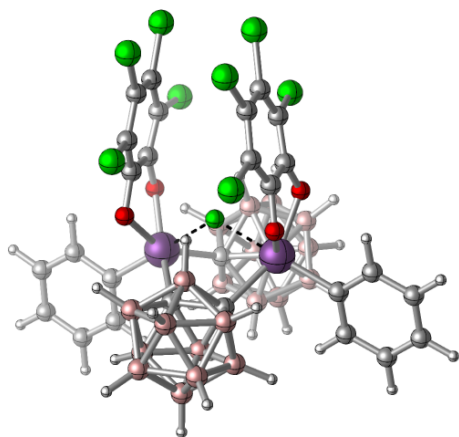

|                                              |                             |
|----------------------------------------------|-----------------------------|
| Zero-point correction=                       | 0.591120 (Hartree/Particle) |
| Thermal correction to Energy=                | 0.646240                    |
| Thermal correction to Enthalpy=              | 0.647185                    |
| Thermal correction to Gibbs Free Energy=     | 0.504123                    |
| Sum of electronic and zero-point Energies=   | -5672.632591                |
| Sum of electronic and thermal Energies=      | -5672.577470                |
| Sum of electronic and thermal Enthalpies=    | -5672.576526                |
| Sum of electronic and thermal Free Energies= | -5672.719587                |

# 1,2-(SbPh)<sub>2</sub>-ortho-(C<sub>2</sub>B<sub>10</sub>H<sub>10</sub>)<sub>2</sub>\_FIA

E(scf) = - 1235.02608123 a.u.

|    |           |           |           |   |           |           |           |
|----|-----------|-----------|-----------|---|-----------|-----------|-----------|
| Sb | 1.966597  | 0.000023  | -1.129944 | B | -1.437774 | -2.885098 | 0.826984  |
| C  | 0.825570  | 1.824093  | -0.386727 | C | 5.323950  | 0.000010  | 2.631396  |
| C  | 0.825601  | -1.824075 | -0.386749 | H | 6.097414  | 0.000005  | 3.404987  |
| C  | 3.314813  | 0.000020  | 0.635406  | C | 5.678496  | 0.000013  | 1.281185  |
| B  | 0.891760  | 4.516176  | 0.367905  | H | 6.732869  | 0.000011  | 0.988527  |
| B  | 1.436473  | 3.360670  | -0.876717 | C | 4.678419  | 0.000018  | 0.299036  |
| B  | 1.437855  | 2.885094  | 0.826878  | H | 4.980558  | 0.000020  | -0.755594 |
| B  | 1.436529  | -3.360635 | -0.876759 | C | 2.982293  | 0.000017  | 2.001284  |
| B  | 1.437906  | -2.885079 | 0.826843  | H | 1.937128  | 0.000018  | 2.310084  |
| B  | 0.000039  | 1.886424  | 1.111914  | C | 3.969958  | 0.000012  | 2.988504  |
| B  | 0.000045  | 3.588775  | 1.609665  | H | 3.682109  | 0.000009  | 4.043880  |
| B  | -0.000095 | 4.375665  | -1.173706 | C | -3.969701 | -0.000046 | 2.988851  |
| B  | -0.000100 | 2.674053  | -1.652462 | H | -3.681759 | -0.000055 | 4.044201  |
| B  | 0.000073  | -1.886436 | 1.111893  | C | -2.982124 | -0.000039 | 2.001543  |
| Sb | -1.966698 | -0.000010 | -1.129751 | H | -1.936931 | -0.000042 | 2.310248  |
| C  | -0.825632 | 1.824077  | -0.386649 | C | -5.323725 | -0.000042 | 2.631864  |
| C  | -0.825601 | -1.824086 | -0.386669 | H | -6.097120 | -0.000048 | 3.405524  |
| B  | -0.891807 | 4.516158  | 0.367989  | C | -5.678392 | -0.000031 | 1.281684  |
| B  | -1.436614 | 3.360641  | -0.876582 | H | -6.732792 | -0.000028 | 0.989121  |
| B  | -1.437825 | 2.885065  | 0.827015  | C | -4.678404 | -0.000024 | 0.299445  |

|   |           |           |           |   |           |           |           |
|---|-----------|-----------|-----------|---|-----------|-----------|-----------|
| H | -4.980636 | -0.000015 | -0.755158 | H | 0.000097  | 3.869397  | 2.779370  |
| C | -3.314769 | -0.000028 | 0.635695  | H | -1.552373 | -5.483771 | 0.644885  |
| B | -1.436559 | -3.360654 | -0.876618 | H | -2.458586 | -2.605123 | 1.377555  |
| B | -0.000058 | -2.674034 | -1.652492 | H | 1.552520  | -5.483751 | 0.644732  |
| B | -0.000023 | -4.375651 | -1.173756 | H | 0.000168  | -3.869429 | 2.779325  |
| B | -0.891729 | -4.516177 | 0.367939  | H | 0.000100  | -0.944225 | 1.830162  |
| B | 0.000109  | -3.588793 | 1.609624  | H | 2.458767  | -2.605089 | 1.377314  |
| B | 0.891837  | -4.516165 | 0.367851  | H | 2.461410  | -3.387595 | -1.501768 |
| H | -0.000060 | -5.225242 | -2.025757 | H | 2.458721  | 2.605115  | 1.377348  |
| H | -2.461501 | -3.387627 | -1.501526 | H | 0.000079  | 0.944204  | 1.830173  |
| H | -0.000116 | -2.254689 | -2.763401 | H | -2.458633 | 2.605066  | 1.377580  |
| H | -0.000150 | 2.254721  | -2.763376 | H | -1.552467 | 5.483739  | 0.644946  |
| H | -0.000144 | 5.225266  | -2.025697 | H | -2.461556 | 3.387603  | -1.501492 |
| H | 2.461355  | 3.387654  | -1.501725 | F | -0.000048 | 0.000014  | -2.284046 |
| H | 1.552426  | 5.483770  | 0.644798  |   |           |           |           |

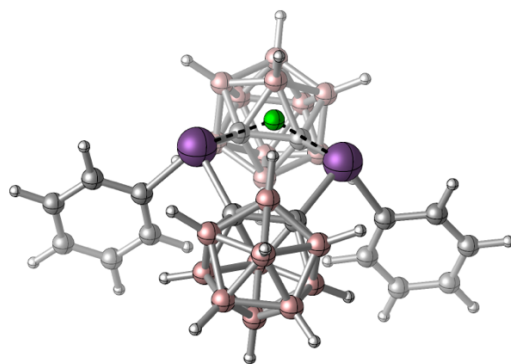

|                                              |                             |
|----------------------------------------------|-----------------------------|
| Zero-point correction=                       | 0.490102 (Hartree/Particle) |
| Thermal correction to Energy=                | 0.522212                    |
| Thermal correction to Enthalpy=              | 0.523157                    |
| Thermal correction to Gibbs Free Energy=     | 0.429874                    |
| Sum of electronic and zero-point Energies=   | -1234.535979                |
| Sum of electronic and thermal Energies=      | -1234.503869                |
| Sum of electronic and thermal Enthalpies=    | -1234.502925                |
| Sum of electronic and thermal Free Energies= | -1234.596207                |

***o*-(C<sub>6</sub>F<sub>4</sub>)(SbPh<sub>2</sub>(diolate))<sub>2</sub>\_FIA**

E(scf) = -6102.36741067 a.u.

|    |           |           |           |   |          |           |           |
|----|-----------|-----------|-----------|---|----------|-----------|-----------|
| Cl | 4.986845  | -0.549812 | -4.381845 | C | 0.038577 | 0.692491  | 4.764815  |
| Cl | -4.986763 | 0.552254  | -4.381589 | C | 1.779868 | 3.464180  | 1.298589  |
| C  | 0.087243  | 0.701770  | 2.322475  | C | 1.055731 | -2.642920 | -0.233212 |
| C  | 0.102097  | 1.368846  | 3.539858  | C | 2.604183 | 1.009989  | -1.514884 |

|    |           |           |           |    |           |           |           |
|----|-----------|-----------|-----------|----|-----------|-----------|-----------|
| C  | 3.185250  | 0.710978  | -2.751485 | C  | -3.096966 | -0.372174 | -0.340278 |
| C  | 4.310841  | -0.139494 | -2.823912 | Cl | -2.472016 | -1.407782 | -4.180805 |
| C  | 4.854234  | -0.685093 | -1.651760 | Cl | -6.261311 | 1.718403  | -1.725250 |
| C  | 4.242408  | -0.424866 | -0.407904 | Cl | -4.866755 | 1.082662  | 1.081733  |
| C  | 3.096948  | 0.372344  | -0.340064 | F  | -0.185490 | -2.712808 | 3.598694  |
| Cl | 2.472075  | 1.410088  | -4.180027 | F  | -0.071142 | -1.365938 | 5.916990  |
| Cl | 6.261358  | -1.717411 | -1.726125 | O  | -1.575560 | -1.833660 | -1.364300 |
| Cl | 4.866726  | -1.083250 | 1.081180  | O  | -2.423108 | -0.590798 | 0.780270  |
| F  | 0.185445  | 2.710847  | 3.600166  | Sb | -0.728565 | -1.767906 | 0.518088  |
| F  | 0.071100  | 1.362721  | 5.917729  | C  | 3.191248  | 5.683101  | 2.282894  |
| O  | 1.575542  | 1.834378  | -1.363305 | H  | 3.740724  | 6.547125  | 2.667447  |
| O  | 2.423060  | 0.590327  | 0.780589  | C  | 2.014266  | 5.869334  | 1.552227  |
| Sb | 0.728541  | 1.767606  | 0.519046  | H  | 1.640203  | 6.879024  | 1.360324  |
| C  | -0.087285 | -0.703038 | 2.322096  | C  | 1.311041  | 4.763465  | 1.061716  |
| C  | -0.102141 | -1.370775 | 3.539117  | H  | 0.391859  | 4.922924  | 0.491516  |
| C  | -0.038619 | -0.695084 | 4.764439  | C  | 2.968079  | 3.282426  | 2.023073  |
| C  | -1.779867 | -3.464929 | 1.296691  | H  | 3.349748  | 2.272474  | 2.190225  |
| C  | -1.055736 | 2.643062  | -0.231781 | C  | 3.667211  | 4.388470  | 2.515373  |
| C  | -2.604185 | -1.009172 | -1.515442 | H  | 4.591643  | 4.237263  | 3.079999  |
| C  | -3.185218 | -0.709463 | -2.751890 | C  | -1.398043 | 2.495362  | -1.584342 |
| C  | -4.310795 | 0.141065  | -2.823870 | H  | -0.733829 | 1.948458  | -2.256042 |
| C  | -4.854205 | 0.686022  | -1.651427 | C  | -1.912757 | 3.329400  | 0.637642  |
| C  | -4.242410 | 0.425095  | -0.407701 | H  | -1.665469 | 3.427561  | 1.699494  |

|   |           |           |           |   |          |           |           |
|---|-----------|-----------|-----------|---|----------|-----------|-----------|
| C | -3.102028 | 3.883504  | 0.152974  | C | 1.912744 | -3.329754 | 0.635826  |
| H | -3.778721 | 4.401844  | 0.836878  | H | 1.665446 | -3.428521 | 1.697619  |
| C | -3.440968 | 3.740856  | -1.194530 | C | 1.398049 | -2.494450 | -1.585686 |
| H | -4.389648 | 4.135423  | -1.564479 | H | 0.733845 | -1.947160 | -2.257081 |
| C | -2.592475 | 3.042938  | -2.060115 | C | 2.592484 | -3.041757 | -2.061762 |
| H | -2.878893 | 2.895737  | -3.104493 | H | 2.878910 | -2.893964 | -3.106054 |
| C | 3.102018  | -3.883584 | 0.150852  | C | 3.440969 | -3.740170 | -1.196569 |
| H | 3.778705  | -4.402314 | 0.834466  |   |          |           |           |

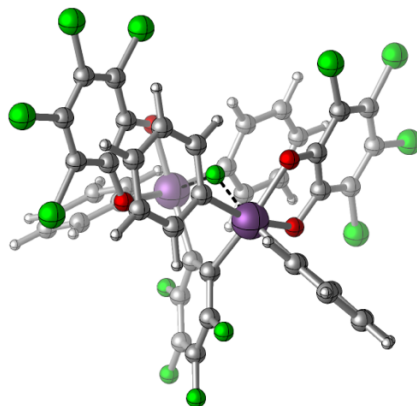

|                                              |                             |
|----------------------------------------------|-----------------------------|
| Zero-point correction=                       | 0.510745 (Hartree/Particle) |
| Thermal correction to Energy=                | 0.568066                    |
| Thermal correction to Enthalpy=              | 0.569010                    |
| Thermal correction to Gibbs Free Energy=     | 0.414261                    |
| Sum of electronic and zero-point Energies=   | -6101.856666                |
| Sum of electronic and thermal Energies=      | -6101.799345                |
| Sum of electronic and thermal Enthalpies=    | -6101.798401                |
| Sum of electronic and thermal Free Energies= | -6101.953150                |

# 1,2-(SbPh<sub>2</sub>)<sub>2</sub>-ortho-(C<sub>2</sub>B<sub>10</sub>H<sub>10</sub>)\_FIA

E(scf) = -1367.31079639 a.u.

|    |           |           |           |   |           |           |           |
|----|-----------|-----------|-----------|---|-----------|-----------|-----------|
| Sb | 2.021820  | -0.759512 | 0.678051  | C | 4.388618  | 0.609256  | 2.168767  |
| Sb | -2.021801 | -0.759530 | -0.678013 | H | 3.794207  | 0.235161  | 3.011232  |
| C  | 0.844003  | 1.128422  | 0.176911  | C | 5.585153  | 1.284824  | 2.440801  |
| C  | -0.843991 | 1.128418  | -0.176908 | H | 5.908784  | 1.431018  | 3.476162  |
| C  | 3.932706  | 0.407985  | 0.854737  | C | 6.362117  | 1.773559  | 1.387217  |
| C  | -3.932679 | 0.407973  | -0.854790 | H | 7.297401  | 2.303895  | 1.590376  |
| B  | 1.216902  | 2.468504  | 1.163694  | C | 5.933821  | 1.577971  | 0.069251  |
| B  | -1.216892 | 2.468492  | -1.163702 | H | 6.534602  | 1.957554  | -0.763275 |
| B  | 1.588859  | 2.474447  | -0.566721 | C | -1.720898 | -1.805144 | 2.302589  |
| B  | -1.588850 | 2.474447  | 0.566713  | H | -0.670795 | -1.552160 | 2.168090  |
| B  | 0.302506  | 1.555818  | -1.380940 | C | -2.140849 | -2.390768 | 3.501545  |
| B  | -0.302494 | 1.555829  | 1.380939  | H | -1.414611 | -2.554697 | 4.303327  |
| B  | 0.302927  | 3.347172  | -1.416664 | C | -3.474706 | -2.772762 | 3.674221  |
| B  | -0.302920 | 3.347183  | 1.416649  | H | -3.801264 | -3.234336 | 4.610905  |
| C  | 2.628712  | -1.564002 | -1.257992 | C | -4.385225 | -2.566520 | 2.633924  |
| C  | -2.628746 | -1.563948 | 1.258044  | H | -5.430676 | -2.868712 | 2.749281  |
| B  | 0.868273  | 3.916157  | 0.186330  | C | -3.964966 | -1.964301 | 1.442523  |
| B  | -0.868267 | 3.916153  | -0.186350 | H | -4.701896 | -1.802252 | 0.651260  |
| C  | 4.734951  | 0.904723  | -0.187701 | C | -4.734947 | 0.904760  | 0.187606  |
| H  | 4.424660  | 0.763150  | -1.226155 | H | -4.424684 | 0.763229  | 1.226075  |

|   |           |           |           |   |           |           |           |
|---|-----------|-----------|-----------|---|-----------|-----------|-----------|
| C | -5.933805 | 1.578006  | -0.069404 | H | 3.801142  | -3.234515 | -4.610822 |
| H | -6.534605 | 1.957629  | 0.763090  | C | 2.140762  | -2.390881 | -3.501460 |
| C | -6.362067 | 1.773542  | -1.387390 | H | 1.414507  | -2.554820 | -4.303225 |
| H | -7.297342 | 2.303876  | -1.590595 | H | 2.077112  | 2.340223  | 1.986126  |
| C | -5.585080 | 1.284755  | -2.440933 | H | -0.493426 | 0.821763  | 2.304364  |
| H | -5.908684 | 1.430907  | -3.476309 | H | -0.521675 | 3.935292  | 2.444024  |
| C | -4.388557 | 0.609190  | -2.168840 | H | 1.513559  | 4.923446  | 0.327000  |
| H | -3.794128 | 0.235055  | -3.011274 | H | 2.705067  | 2.362502  | -0.970959 |
| C | 1.720842  | -1.805212 | -2.302515 | H | 0.493442  | 0.821744  | -2.304358 |
| H | 0.670746  | -1.552203 | -2.168009 | H | 0.521681  | 3.935273  | -2.444044 |
| C | 3.964920  | -1.964387 | -1.442482 | H | -2.077101 | 2.340204  | -1.986134 |
| H | 4.701867  | -1.802326 | -0.651236 | H | -1.513556 | 4.923440  | -0.327029 |
| C | 4.385148  | -2.566650 | -2.633871 | H | -2.705057 | 2.362501  | 0.970953  |
| H | 5.430592  | -2.868865 | -2.749236 | F | -0.000009 | -1.527588 | 0.000056  |
| C | 3.474608  | -2.772906 | -3.674147 |   |           |           |           |

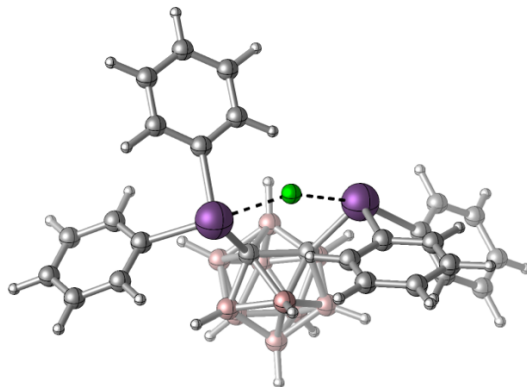

Zero-point correction= 0.516862 (Hartree/Particle)  
 Thermal correction to Energy= 0.551394  
 Thermal correction to Enthalpy= 0.552338  
 Thermal correction to Gibbs Free Energy= 0.448977  
 Sum of electronic and zero-point Energies= -1366.793935  
 Sum of electronic and thermal Energies= -1366.759402  
 Sum of electronic and thermal Enthalpies= -1366.758458  
 Sum of electronic and thermal Free Energies= -1366.861819

**o-(C<sub>2</sub>B<sub>10</sub>H<sub>10</sub>)(SbPh<sub>2</sub>Cl)<sub>2</sub>O\_FIA**

E(scf) = -2362.69506766 a.u.

|   |          |          |           |   |           |          |           |
|---|----------|----------|-----------|---|-----------|----------|-----------|
| C | 2.044539 | 4.319943 | -1.198998 | H | 3.305722  | 4.371548 | 1.971471  |
| H | 1.796289 | 4.989953 | -2.026833 | C | -1.744499 | 5.175665 | -0.139931 |
| C | 2.585558 | 4.836894 | -0.016956 | H | -1.728917 | 6.269199 | -0.112112 |
| H | 2.769211 | 5.910961 | 0.079459  | C | -2.480510 | 4.507964 | -1.122904 |
| C | 2.883409 | 3.976084 | 1.042856  | H | -3.046864 | 5.076422 | -1.866579 |

|    |           |           |           |   |           |           |           |
|----|-----------|-----------|-----------|---|-----------|-----------|-----------|
| C  | -2.493379 | 3.108740  | -1.168016 | H | -6.029634 | -1.199933 | 2.386662  |
| H  | -3.068304 | 2.593268  | -1.938707 | C | -4.222515 | -0.619925 | 1.353457  |
| Sb | 1.607733  | -0.007347 | -0.350874 | H | -4.705274 | -0.574279 | 0.374625  |
| Sb | -1.649312 | 0.211736  | -0.214335 | C | -1.764168 | 2.369706  | -0.230783 |
| Cl | 3.195556  | -0.292035 | -2.222243 | C | -1.026417 | 3.041204  | 0.755685  |
| Cl | -3.464435 | 0.051573  | -1.920118 | H | -0.424477 | 2.468998  | 1.462199  |
| O  | 0.031067  | 0.263987  | 0.825896  | C | -1.019670 | 4.438299  | 0.800439  |
| C  | 0.633433  | -1.969871 | -0.898130 | H | -0.422864 | 4.947952  | 1.561303  |
| C  | 2.349128  | -0.823734 | 2.515224  | B | -0.196920 | -2.652448 | 0.450759  |
| H  | 1.331647  | -0.473132 | 2.699956  | H | -0.134624 | -2.132113 | 1.515409  |
| C  | 2.093435  | 2.084866  | -0.260772 | C | -0.992353 | -1.853825 | -0.854806 |
| C  | 1.799245  | 2.949981  | -1.321971 | C | 2.861487  | -0.774120 | 1.209507  |
| H  | 1.348617  | 2.552531  | -2.232372 | C | 4.163366  | -1.229323 | 0.962182  |
| C  | 2.637958  | 2.602608  | 0.920415  | H | 4.562172  | -1.197675 | -0.054746 |
| H  | 2.869111  | 1.940359  | 1.759595  | C | 4.944757  | -1.730687 | 2.008742  |
| C  | -2.855653 | -0.332940 | 1.467672  | H | 5.957840  | -2.089638 | 1.805628  |
| C  | -2.238113 | -0.401494 | 2.726234  | C | 4.430619  | -1.779950 | 3.308410  |
| H  | -1.171135 | -0.185089 | 2.807536  | H | 5.040980  | -2.176403 | 4.125097  |
| C  | -2.982423 | -0.754500 | 3.856411  | C | 3.132467  | -1.324648 | 3.560409  |
| H  | -2.492499 | -0.810372 | 4.832833  | H | 2.724232  | -1.364248 | 4.574473  |
| C  | -4.345929 | -1.041585 | 3.738240  | B | 1.169267  | -3.487792 | -0.305428 |
| H  | -4.926272 | -1.322281 | 4.622046  | H | 2.204597  | -3.537254 | 0.293730  |
| C  | -4.964364 | -0.972463 | 2.485990  | B | 1.147273  | -3.135251 | -2.044802 |

|   |           |           |           |   |           |           |           |
|---|-----------|-----------|-----------|---|-----------|-----------|-----------|
| H | 2.168519  | -2.958397 | -2.637438 | B | 0.502713  | -4.686019 | -1.442829 |
| B | -0.232430 | -2.063367 | -2.387784 | H | 1.080966  | -5.719589 | -1.661501 |
| H | -0.189089 | -1.163410 | -3.160630 | B | -0.362868 | -3.795867 | -2.729220 |
| B | -1.708086 | -3.281660 | -0.229667 | H | -0.420713 | -4.173459 | -3.870108 |
| H | -2.707204 | -3.184095 | 0.423101  | B | -1.727804 | -2.933963 | -1.970518 |
| B | -0.330053 | -4.373969 | 0.107364  | H | -2.743333 | -2.620537 | -2.512247 |
| H | -0.362268 | -5.159107 | 1.018777  |   |           |           |           |

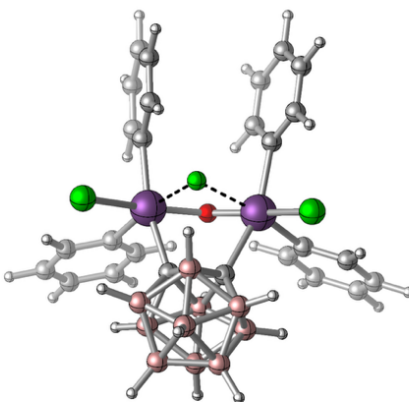

|                                              |                             |
|----------------------------------------------|-----------------------------|
| Zero-point correction=                       | 0.525097 (Hartree/Particle) |
| Thermal correction to Energy=                | 0.563453                    |
| Thermal correction to Enthalpy=              | 0.564397                    |
| Thermal correction to Gibbs Free Energy=     | 0.454047                    |
| Sum of electronic and zero-point Energies=   | -2362.169970                |
| Sum of electronic and thermal Energies=      | -2362.131615                |
| Sum of electronic and thermal Enthalpies=    | -2362.130670                |
| Sum of electronic and thermal Free Energies= | -2362.241021                |

**o-(C<sub>2</sub>B<sub>10</sub>H<sub>10</sub>)(SbPh<sub>2</sub>(diolate))<sub>2</sub>\_HIA**

E(scf) = -5706.33010826 a.u.

|    |           |           |           |    |           |           |           |
|----|-----------|-----------|-----------|----|-----------|-----------|-----------|
| H  | 3.239892  | -2.499560 | -6.895916 | Cl | -5.137521 | -0.781470 | -0.540344 |
| Cl | 6.146800  | 2.165576  | 1.278691  | Cl | -6.147651 | 2.157836  | -1.288284 |
| Cl | 5.138200  | -0.777480 | 0.543569  | Cl | -1.624051 | 4.185083  | 1.073670  |
| C  | 3.747376  | 0.779107  | 3.586226  | O  | 1.155813  | 1.297692  | -1.718499 |
| H  | 4.712955  | 1.114448  | 3.971369  | O  | 2.508402  | -0.754711 | -0.846902 |
| C  | 3.382436  | -0.566388 | 3.674598  | O  | -2.507541 | -0.751303 | 0.849521  |
| H  | 4.055123  | -1.289749 | 4.142591  | O  | -1.155849 | 1.305538  | 1.712048  |
| Cl | 4.337034  | 4.651584  | 0.527648  | C  | 0.282831  | -2.722044 | -0.763465 |
| Cl | -4.339102 | 4.648027  | -0.548167 | C  | -0.282002 | -2.718487 | 0.775987  |
| C  | 2.864409  | -1.826375 | -3.567235 | C  | 2.260390  | 1.559754  | -1.029907 |
| C  | 3.468783  | -2.237169 | -4.758873 | C  | 2.664996  | 2.850031  | -0.672319 |
| H  | 4.497987  | -2.606134 | -4.741527 | C  | 3.872953  | 3.042826  | 0.032650  |
| C  | 2.764536  | -2.176560 | -5.965389 | C  | 4.664577  | 1.938595  | 0.385890  |
| C  | 1.452898  | -1.695545 | -5.977689 | C  | 4.231314  | 0.633924  | 0.074691  |
| H  | 0.896733  | -1.635566 | -6.917332 | C  | 3.020390  | 0.438833  | -0.595442 |
| C  | 0.844631  | -1.284503 | -4.786298 | C  | 1.541472  | -1.352712 | -3.570814 |
| H  | -0.177521 | -0.902403 | -4.819006 | H  | 3.422464  | -1.865407 | -2.631092 |
| Sb | 0.614959  | -0.706149 | -1.740786 | C  | -1.303415 | -0.100094 | -2.513530 |
| Sb | -0.614438 | -0.698066 | 1.743681  | C  | -2.161261 | -1.014241 | -3.142946 |
| Cl | 1.622384  | 4.180222  | -1.092409 | H  | -1.893323 | -2.069287 | -3.223635 |

|   |           |           |           |   |           |           |          |
|---|-----------|-----------|-----------|---|-----------|-----------|----------|
| C | -3.382084 | -0.583967 | -3.671833 | C | -2.864126 | -1.809900 | 3.575053 |
| H | -4.054586 | -1.309533 | -4.136668 | H | -3.422056 | -1.853364 | 2.639029 |
| C | -3.747381 | 0.761805  | -3.589305 | C | -3.468655 | -2.215161 | 4.768509 |
| H | -4.713051 | 1.095212  | -3.975899 | H | -4.497842 | -2.584245 | 4.752738 |
| C | -2.890347 | 1.677142  | -2.973454 | C | -2.764574 | -2.148911 | 5.974824 |
| H | -3.181190 | 2.726321  | -2.885121 | H | -3.240043 | -2.467593 | 6.906782 |
| C | -1.674835 | 1.250956  | -2.428505 | C | -1.452951 | -1.667806 | 5.985058 |
| H | -1.020095 | 1.972384  | -1.937714 | H | -0.896910 | -1.603450 | 6.924486 |
| C | -3.020204 | 0.440888  | 0.593065  | C | -0.844538 | -1.262284 | 4.791850 |
| C | -4.231331 | 0.632438  | -0.077700 | H | 0.177606  | -0.880022 | 4.822916 |
| C | -4.665275 | 1.935519  | -0.394557 | C | 1.303646  | -0.088111 | 2.514181 |
| C | -3.874165 | 3.041670  | -0.046216 | C | 1.674702  | 1.262658  | 2.423302 |
| C | -2.666038 | 2.852561  | 0.659465  | H | 1.019771  | 1.981770  | 1.929369 |
| C | -2.260685 | 1.564054  | 1.022545  | C | 2.890095  | 1.691532  | 2.966410 |
| C | -1.541214 | -1.336159 | 3.576603  |   |           |           |          |

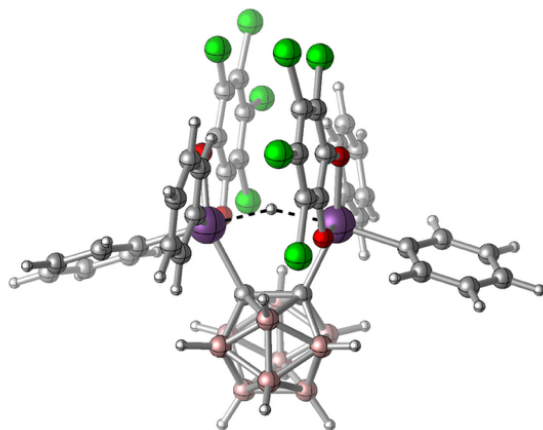

|                                              |                             |
|----------------------------------------------|-----------------------------|
| Zero-point correction=                       | 0.624163 (Hartree/Particle) |
| Thermal correction to Energy=                | 0.680277                    |
| Thermal correction to Enthalpy=              | 0.681221                    |
| Thermal correction to Gibbs Free Energy=     | 0.533311                    |
| Sum of electronic and zero-point Energies=   | -5705.705945                |
| Sum of electronic and thermal Energies=      | -5705.649831                |
| Sum of electronic and thermal Enthalpies=    | -5705.648887                |
| Sum of electronic and thermal Free Energies= | -5705.796797                |

**o-(C<sub>2</sub>B<sub>10</sub>H<sub>10</sub>)<sub>2</sub>(SbPh(diolate))<sub>2</sub>\_HIA**

E(scf) = -5574.00123613 a.u.

|    |           |           |           |    |           |           |           |
|----|-----------|-----------|-----------|----|-----------|-----------|-----------|
| H  | 4.027915  | 6.873135  | 1.688566  | Cl | -5.237016 | -2.348561 | 1.618067  |
| H  | 5.375397  | 4.827079  | 1.217383  | Cl | -5.489616 | -1.245541 | -1.341340 |
| C  | 3.526572  | 5.928987  | 1.459007  | Cl | -2.848628 | -0.814636 | -3.081986 |
| C  | 4.283622  | 4.783369  | 1.195466  | O  | -0.392167 | 1.864755  | 1.685427  |
| H  | 5.447744  | -0.690926 | 3.635861  | O  | -0.188285 | 2.676204  | -0.733059 |
| C  | 4.284067  | -4.783064 | -1.195398 | O  | -0.391964 | -1.864854 | -1.685456 |
| C  | 3.527115  | -5.928736 | -1.458989 | O  | -0.188058 | -2.676293 | 0.733020  |
| H  | 4.028539  | -6.872841 | -1.688545 | C  | 2.220531  | 1.184916  | -1.585285 |
| C  | 2.130290  | -5.869192 | -1.427046 | C  | 2.136400  | -0.380492 | -2.003208 |
| H  | 1.536710  | -6.764260 | -1.630433 | C  | 2.220607  | -1.184772 | 1.585318  |
| C  | 1.486655  | -4.664093 | -1.130493 | C  | -1.538605 | 1.941518  | 1.007217  |
| H  | 0.396216  | -4.618835 | -1.094943 | C  | -1.425942 | 2.402313  | -0.329426 |
| H  | 5.375846  | -4.826691 | -1.217274 | C  | -2.553952 | 2.477807  | -1.152208 |
| Sb | 1.235281  | 1.715860  | 0.416278  | C  | -3.819593 | 2.143852  | -0.628732 |
| Sb | 1.235455  | -1.715800 | -0.416273 | C  | -3.931420 | 1.662166  | 0.689708  |
| Cl | -2.336285 | 2.988024  | -2.799550 | C  | -2.780210 | 1.518839  | 1.494350  |
| Cl | -5.237228 | 2.348290  | -1.618107 | C  | -1.538402 | -1.941662 | -1.007254 |
| Cl | -5.489790 | 1.245237  | 1.341291  | C  | -1.425724 | -2.402448 | 0.329390  |
| Cl | -2.848788 | 0.814424  | 3.081938  | C  | -2.553733 | -2.477980 | 1.152172  |
| Cl | -2.336048 | -2.988173 | 2.799519  | C  | -3.819387 | -2.144077 | 0.628693  |

|   |           |           |           |   |          |           |           |
|---|-----------|-----------|-----------|---|----------|-----------|-----------|
| C | -3.931230 | -1.662405 | -0.689751 | B | 3.022223 | 0.160749  | -4.577074 |
| C | -2.780024 | -1.519037 | -1.494392 | H | 3.319150 | -0.249965 | -5.667829 |
| C | 2.245919  | -3.515838 | -0.871423 | B | 3.127494 | 1.880470  | -4.117275 |
| C | 3.645192  | -3.574689 | -0.902900 | H | 3.496217 | 2.741710  | -4.871507 |
| B | 1.854737  | -2.212895 | 2.923171  | B | 1.854616 | 2.213003  | -2.923153 |
| H | 1.303893  | -3.249841 | 2.717431  | H | 1.303667 | 3.249898  | -2.717438 |
| B | 0.959733  | -0.694246 | 2.651348  | B | 1.686072 | -0.577954 | -3.659437 |
| H | -0.151796 | -0.634090 | 2.244192  | H | 1.009396 | -1.514464 | -3.960600 |
| H | 0.727932  | -1.369128 | 5.128729  | C | 2.245583 | 3.515982  | 0.871437  |
| B | 0.959749  | 0.694269  | -2.651357 | C | 1.486221 | 4.664183  | 1.130457  |
| H | -0.151790 | 0.634018  | -2.244243 | H | 0.395786 | 4.618843  | 1.094865  |
| B | 1.524516  | 1.092759  | -4.274318 | C | 2.129752 | 5.869336  | 1.427012  |
| H | 0.727981  | 1.369116  | -5.128752 | H | 1.536096 | 6.764363  | 1.630360  |
| B | 3.363578  | -0.814352 | -3.130681 | C | 3.644850 | 3.574939  | 0.902965  |
| H | 3.830853  | -1.912940 | -3.082691 |   |          |           |           |

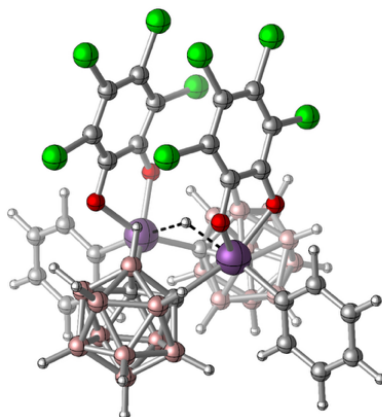

|                                              |                             |
|----------------------------------------------|-----------------------------|
| Zero-point correction=                       | 0.595117 (Hartree/Particle) |
| Thermal correction to Energy=                | 0.649400                    |
| Thermal correction to Enthalpy=              | 0.650344                    |
| Thermal correction to Gibbs Free Energy=     | 0.508143                    |
| Sum of electronic and zero-point Energies=   | -5573.406119                |
| Sum of electronic and thermal Energies=      | -5573.351836                |
| Sum of electronic and thermal Enthalpies=    | -5573.350892                |
| Sum of electronic and thermal Free Energies= | -5573.493093                |

**$o\text{-(C}_6\text{F}_4\text{)(SbPh}_2\text{(diolate))}_2\text{_HIA}$**

E(scf) = -6003.13675492 a.u.

|    |           |           |           |   |           |          |          |
|----|-----------|-----------|-----------|---|-----------|----------|----------|
| Cl | -4.901694 | -4.409763 | -0.415917 | C | -0.058610 | 2.440426 | 0.700170 |
| Cl | 4.901389  | -4.410252 | 0.413405  | C | -0.068949 | 3.649758 | 1.379948 |

|    |           |           |           |    |           |           |           |
|----|-----------|-----------|-----------|----|-----------|-----------|-----------|
| C  | -0.025445 | 4.871697  | 0.697507  | C  | 3.010289  | -2.776635 | -0.703412 |
| C  | -1.508746 | 1.190333  | 3.495055  | C  | 4.233926  | -2.850221 | -0.002700 |
| C  | -1.298361 | -0.180246 | -2.488241 | C  | 4.879986  | -1.673194 | 0.401986  |
| C  | -2.432223 | -1.536136 | 0.989877  | C  | 4.282139  | -0.421672 | 0.149156  |
| C  | -3.010466 | -2.776910 | 0.701801  | C  | 3.043114  | -0.345049 | -0.495972 |
| C  | -4.234111 | -2.850015 | 0.001052  | Cl | 2.158614  | -4.210434 | -1.211340 |
| C  | -4.880083 | -1.672714 | -0.402977 | Cl | 6.393353  | -1.749606 | 1.270182  |
| C  | -4.282145 | -0.421377 | -0.149442 | Cl | 5.032710  | 1.072923  | 0.643840  |
| C  | -3.043115 | -0.345205 | 0.495730  | F  | 0.117562  | 3.702669  | -2.720038 |
| Cl | -2.158881 | -4.211056 | 1.208903  | F  | 0.044386  | 6.028847  | -1.359684 |
| Cl | -6.393452 | -1.748528 | -1.271224 | O  | 1.302775  | -1.397199 | -1.675434 |
| Cl | -5.032596 | 1.073547  | -0.643311 | O  | 2.386396  | 0.787787  | -0.678900 |
| F  | -0.117197 | 3.701046  | 2.722272  | Sb | 0.550378  | 0.539299  | -1.688933 |
| F  | -0.043819 | 6.028036  | 1.363312  | C  | -2.772773 | 2.028907  | 5.859170  |
| O  | -1.302827 | -1.398153 | 1.674557  | H  | -3.264935 | 2.356338  | 6.779484  |
| O  | -2.386319 | 0.787485  | 0.679286  | C  | -1.563143 | 1.331543  | 5.920737  |
| Sb | -0.550340 | 0.538308  | 1.689220  | H  | -1.105466 | 1.108569  | 6.888761  |
| C  | 0.058789  | 2.440835  | -0.698698 | C  | -0.933183 | 0.914395  | 4.742803  |
| C  | 0.069263  | 3.650577  | -1.377747 | H  | 0.012660  | 0.370084  | 4.805658  |
| C  | 0.025882  | 4.872111  | -0.694572 | C  | -2.728770 | 1.882203  | 3.438936  |
| C  | 1.508752  | 1.192387  | -3.494400 | H  | -3.192991 | 2.079621  | 2.470174  |
| C  | 1.298339  | -0.181807 | 2.488152  | C  | -3.354515 | 2.301426  | 4.616574  |
| C  | 2.432143  | -1.535657 | -0.990798 | H  | -4.304615 | 2.840507  | 4.562174  |

|   |          |           |          |   |           |           |           |
|---|----------|-----------|----------|---|-----------|-----------|-----------|
| C | 1.623251 | -1.544813 | 2.413922 | C | -3.416861 | 0.264175  | -3.581391 |
| H | 0.929034 | -2.247542 | 1.947940 | H | -4.127589 | 0.974554  | -4.010939 |
| C | 2.199833 | 0.720784  | 3.067310 | C | -2.199813 | 0.722728  | -3.066871 |
| H | 1.963135 | 1.788364  | 3.115458 | H | -1.963057 | 1.790323  | -3.114416 |
| C | 3.416840 | 0.261865  | 3.581605 | C | -1.623361 | -1.543271 | -2.414766 |
| H | 4.127603 | 0.971957  | 4.011569 | H | -0.929182 | -2.246308 | -1.949192 |
| C | 3.736901 | -1.096284 | 3.513471 | C | -2.842841 | -1.995316 | -2.927860 |
| H | 4.704064 | -1.449395 | 3.877888 | H | -3.110470 | -3.051060 | -2.838242 |
| C | 2.842686 | -1.997224 | 2.926798 | C | -3.737012 | -1.093991 | -3.514005 |
| H | 3.110248 | -3.052936 | 2.836602 |   |           |           |           |

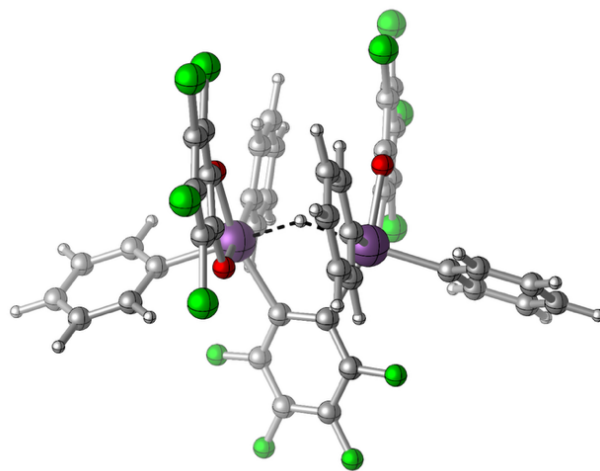

Zero-point correction= 0.515781 (Hartree/Particle)

Thermal correction to Energy= 0.572287

Thermal correction to Enthalpy= 0.573232

Thermal correction to Gibbs Free Energy= 0.419605

Sum of electronic and zero-point Energies= -6002.620974  
 Sum of electronic and thermal Energies= -6002.564467  
 Sum of electronic and thermal Enthalpies= -6002.563523  
 Sum of electronic and thermal Free Energies= -6002.717150

**1,2-(SbPh)<sub>2</sub>-ortho-(C<sub>2</sub>B<sub>10</sub>H<sub>10</sub>)<sub>2</sub>\_HIA**

E(scf) = -1135.79509706 a.u.

|    |           |           |           |   |           |           |           |
|----|-----------|-----------|-----------|---|-----------|-----------|-----------|
| Sb | 1.852186  | 0.000649  | -1.174507 | C | -0.827898 | 1.920159  | -0.416959 |
| C  | 0.826539  | 1.920773  | -0.416758 | C | -0.826567 | -1.920725 | -0.416946 |
| C  | 0.827871  | -1.920212 | -0.416822 | B | -0.892865 | 4.614809  | 0.264123  |
| C  | 3.216821  | 0.000984  | 0.581730  | B | -1.442062 | 3.431203  | -0.948688 |
| B  | 0.889218  | 4.615504  | 0.264319  | B | -1.441471 | 2.995945  | 0.768287  |
| B  | 1.439613  | 3.432320  | -0.948359 | B | -1.439343 | -2.996946 | 0.768317  |
| B  | 1.438984  | 2.997058  | 0.768618  | C | 5.223144  | 0.001255  | 2.576572  |
| B  | 1.441957  | -3.431331 | -0.948469 | H | 5.996400  | 0.001355  | 3.350306  |
| B  | 1.441112  | -2.996091 | 0.768512  | C | 5.577881  | 0.001211  | 1.226188  |
| B  | -0.000893 | 1.996529  | 1.071317  | H | 6.632336  | 0.001277  | 0.933767  |
| B  | -0.001614 | 3.717041  | 1.532348  | C | 4.579340  | 0.001080  | 0.242989  |
| B  | -0.001597 | 4.431605  | -1.281252 | H | 4.881369  | 0.001044  | -0.811112 |
| B  | -0.000900 | 2.706223  | -1.691272 | C | 2.880835  | 0.001036  | 1.945651  |
| B  | 0.000570  | -1.996550 | 1.071292  | H | 1.836399  | 0.000968  | 2.253492  |
| Sb | -1.851715 | -0.000642 | -1.174864 | C | 3.869585  | 0.001171  | 2.932803  |

|   |           |           |           |   |           |           |           |
|---|-----------|-----------|-----------|---|-----------|-----------|-----------|
| H | 3.580775  | 0.001205  | 3.987901  | H | 0.000753  | -2.203679 | -2.778972 |
| C | -3.870081 | -0.001189 | 2.931902  | H | -0.000669 | 2.203706  | -2.778942 |
| H | -3.581535 | -0.001239 | 3.987071  | H | -0.001840 | 5.261927  | -2.152274 |
| C | -2.881080 | -0.001055 | 1.945000  | H | 2.463866  | 3.444799  | -1.574502 |
| H | -1.836721 | -0.001003 | 2.253097  | H | 1.544105  | 5.594394  | 0.514637  |
| C | -5.223548 | -0.001252 | 2.575329  | H | -0.001865 | 4.036457  | 2.692205  |
| H | -5.996998 | -0.001351 | 3.348869  | H | -1.544681 | -5.594260 | 0.514291  |
| C | -5.577949 | -0.001187 | 1.224856  | H | -2.461144 | -2.721027 | 1.322790  |
| H | -6.632329 | -0.001236 | 0.932171  | H | 1.547995  | -5.593353 | 0.514495  |
| C | -4.579164 | -0.001057 | 0.241906  | H | 0.001062  | -4.036498 | 2.692154  |
| H | -4.880927 | -0.001005 | -0.812269 | H | 0.000270  | -1.056119 | 1.799530  |
| C | -3.216732 | -0.000982 | 0.580999  | H | 2.462674  | -2.719575 | 1.323121  |
| B | -1.439719 | -3.432183 | -0.948665 | H | 2.466188  | -3.443099 | -1.574661 |
| B | 0.000914  | -2.706210 | -1.691307 | H | 2.460712  | 2.721240  | 1.323268  |
| B | 0.001417  | -4.431597 | -1.281308 | H | -0.000611 | 1.056090  | 1.799544  |
| B | -0.889654 | -4.615429 | 0.264106  | H | -2.463105 | 2.719314  | 1.322713  |
| B | 0.001042  | -3.717067 | 1.532301  | H | -1.548570 | 5.593190  | 0.514291  |
| B | 0.892429  | -4.614906 | 0.264220  | H | -2.466182 | 3.442873  | -1.575065 |
| H | 0.001697  | -5.261908 | -2.152341 | H | 0.000773  | 0.000011  | -1.799485 |
| H | -2.463861 | -3.444549 | -1.574994 |   |           |           |           |

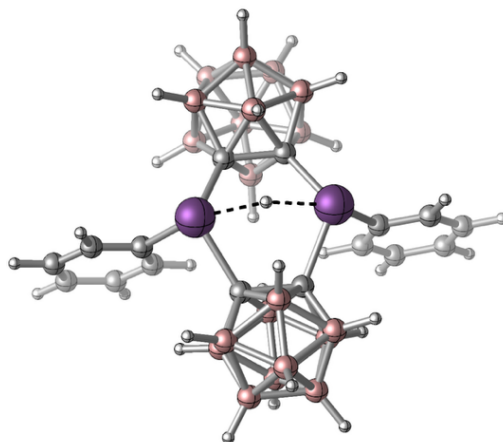

|                                              |                             |
|----------------------------------------------|-----------------------------|
| Zero-point correction=                       | 0.493953 (Hartree/Particle) |
| Thermal correction to Energy=                | 0.524180                    |
| Thermal correction to Enthalpy=              | 0.525124                    |
| Thermal correction to Gibbs Free Energy=     | 0.435919                    |
| Sum of electronic and zero-point Energies=   | -1135.301144                |
| Sum of electronic and thermal Energies=      | -1135.270917                |
| Sum of electronic and thermal Enthalpies=    | -1135.269973                |
| Sum of electronic and thermal Free Energies= | -1135.359178                |

**1,2-(SbPh<sub>2</sub>)<sub>2</sub>-*ortho*-(C<sub>2</sub>B<sub>10</sub>H<sub>10</sub>)\_HIA**

E(scf) = -1268.06959382 a.u.

|    |           |           |           |   |           |           |           |
|----|-----------|-----------|-----------|---|-----------|-----------|-----------|
| Sb | 1.833507  | 0.706779  | -0.723199 | C | 3.819309  | -0.382066 | -0.785944 |
| Sb | -1.833504 | 0.706889  | 0.723182  | C | -3.819356 | -0.381848 | 0.785992  |
| C  | 0.812439  | -1.285115 | -0.213182 | B | 1.159616  | -2.621921 | -1.224062 |
| C  | -0.812488 | -1.285060 | 0.213368  | B | -1.159723 | -2.621760 | 1.224380  |

|   |           |           |           |   |           |           |           |
|---|-----------|-----------|-----------|---|-----------|-----------|-----------|
| B | 1.617457  | -2.626083 | 0.486668  | H | -1.470054 | 2.674798  | -4.244996 |
| B | -1.617563 | -2.626059 | -0.486349 | C | -3.375411 | 3.189051  | -3.355983 |
| B | 0.373138  | -1.720517 | 1.373790  | H | -3.722198 | 3.759257  | -4.222905 |
| B | -0.373204 | -1.720631 | -1.373556 | C | -4.189091 | 3.059321  | -2.225265 |
| B | 0.373283  | -3.505116 | 1.401514  | H | -5.177045 | 3.529437  | -2.202274 |
| B | -0.373425 | -3.505233 | -1.401109 | C | -3.745735 | 2.321157  | -1.123480 |
| C | 2.479526  | 1.706317  | 1.117069  | H | -4.409559 | 2.214234  | -0.260274 |
| C | -2.479408 | 1.706130  | -1.117252 | C | -4.624650 | -0.701732 | -0.320339 |
| B | 0.858996  | -4.068217 | -0.230309 | H | -4.279754 | -0.462701 | -1.330257 |
| B | -0.859163 | -4.068158 | 0.230766  | C | -5.866135 | -1.326863 | -0.162544 |
| C | 4.624622  | -0.701882 | 0.320395  | H | -6.470596 | -1.569018 | -1.042578 |
| H | 4.279764  | -0.462736 | 1.330298  | C | -6.331846 | -1.651741 | 1.116808  |
| C | 4.308794  | -0.711758 | -2.059765 | H | -7.300730 | -2.144507 | 1.242561  |
| H | 3.711204  | -0.477234 | -2.949051 | C | -5.548200 | -1.342064 | 2.231691  |
| C | 5.548064  | -1.342511 | -2.231599 | H | -5.900763 | -1.592792 | 3.237321  |
| H | 5.900584  | -1.593357 | -3.237215 | C | -4.308896 | -0.711387 | 2.059832  |
| C | 6.331729  | -1.652113 | -1.116709 | H | -3.711322 | -0.476804 | 2.949113  |
| H | 7.300587  | -2.144936 | -1.242442 | C | 1.672055  | 1.855947  | 2.255629  |
| C | 5.866072  | -1.327085 | 0.162625  | H | 0.678139  | 1.408063  | 2.285403  |
| H | 6.470549  | -1.569182 | 1.042665  | C | 3.745939  | 2.321170  | 1.123216  |
| C | -1.671976 | 1.855357  | -2.255863 | H | 4.409788  | 2.213946  | 0.260068  |
| H | -0.678125 | 1.407331  | -2.285547 | C | 4.189346  | 3.059546  | 2.224841  |
| C | -2.116559 | 2.583075  | -3.367152 | H | 5.177366  | 3.529518  | 2.201778  |

|   |           |           |           |   |           |           |           |
|---|-----------|-----------|-----------|---|-----------|-----------|-----------|
| C | 3.375634  | 3.189673  | 3.355489  | H | 2.757546  | -2.509497 | 0.817717  |
| H | 3.722465  | 3.760045  | 4.222285  | H | 0.614445  | -0.981567 | 2.283741  |
| C | 2.116696  | 2.583879  | 3.366755  | H | 0.644017  | -4.096562 | 2.414747  |
| H | 1.470169  | 2.675909  | 4.244551  | H | -1.988812 | -2.485440 | 2.078286  |
| H | 1.988713  | -2.485705 | -2.077979 | H | -1.495806 | -5.076545 | 0.400949  |
| H | -0.614486 | -0.981771 | -2.283585 | H | -2.757646 | -2.509449 | -0.817413 |
| H | -0.644185 | -4.096764 | -2.414285 | H | 0.000102  | 1.177656  | 0.000126  |
| H | 1.495595  | -5.076648 | -0.400397 |   |           |           |           |

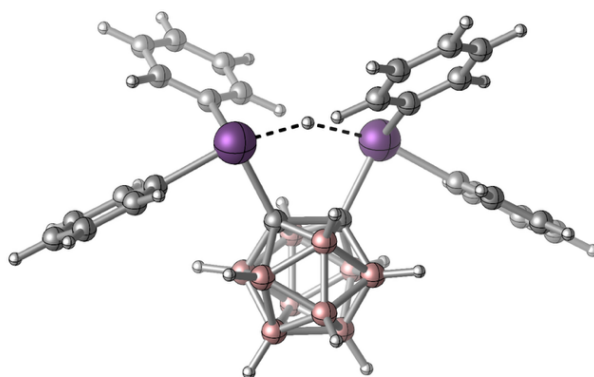

|                                              |                             |
|----------------------------------------------|-----------------------------|
| Zero-point correction=                       | 0.520427 (Hartree/Particle) |
| Thermal correction to Energy=                | 0.554034                    |
| Thermal correction to Enthalpy=              | 0.554978                    |
| Thermal correction to Gibbs Free Energy=     | 0.453138                    |
| Sum of electronic and zero-point Energies=   | -1267.549167                |
| Sum of electronic and thermal Energies=      | -1267.515560                |
| Sum of electronic and thermal Enthalpies=    | -1267.514616                |
| Sum of electronic and thermal Free Energies= | -1267.616456                |

### SiFMe<sub>3</sub>

E(scf) = -223.379169321 a.u.

|   |           |           |           |    |           |           |           |
|---|-----------|-----------|-----------|----|-----------|-----------|-----------|
| C | -0.475717 | 1.727538  | -0.536359 | H  | -2.268979 | -1.032207 | -0.170888 |
| H | -1.476994 | 2.008073  | -0.171357 | C  | 1.733823  | -0.451720 | -0.536793 |
| H | 0.240239  | 2.481213  | -0.170484 | H  | 2.477451  | 0.275124  | -0.171833 |
| H | -0.491041 | 1.785232  | -1.637759 | H  | 2.028606  | -1.448610 | -0.171009 |
| C | -1.258294 | -1.275554 | -0.536649 | H  | 1.791369  | -0.467246 | -1.638199 |
| H | -1.300491 | -1.317671 | -1.638053 | Si | 0.000007  | -0.000002 | 0.026060  |
| H | -1.000810 | -2.282996 | -0.171622 | F  | 0.000187  | -0.000274 | 1.692796  |

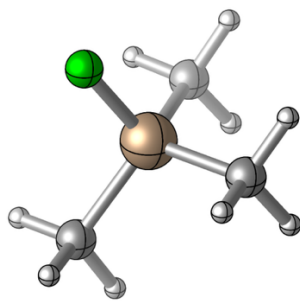

Zero-point correction= 0.113370 (Hartree/Particle)

Thermal correction to Energy= 0.121645

Thermal correction to Enthalpy= 0.122589

Thermal correction to Gibbs Free Energy= 0.081731

Sum of electronic and zero-point Energies= -223.265799

Sum of electronic and thermal Energies= -223.257525  
Sum of electronic and thermal Enthalpies= -223.256580  
Sum of electronic and thermal Free Energies= -223.297439

**SiMe<sub>3</sub>**

E(scf) = -123.268824221 a.u.

|    |           |           |           |   |           |           |           |
|----|-----------|-----------|-----------|---|-----------|-----------|-----------|
| Si | -0.000089 | -0.000075 | -0.000052 | H | 1.176795  | 1.964702  | -0.881031 |
| C  | -1.798809 | -0.419056 | 0.000036  | H | -0.307890 | 2.471456  | -0.000864 |
| H  | -2.289776 | 0.035545  | -0.881776 | C | 1.262442  | -1.348024 | 0.000016  |
| H  | -1.986478 | -1.502443 | 0.000460  | H | 1.114143  | -2.000996 | -0.881415 |
| H  | -2.289927 | 0.036357  | 0.881326  | H | 2.294397  | -0.968514 | -0.000086 |
| C  | 0.536460  | 1.767161  | 0.000009  | H | 1.114166  | -2.000677 | 0.881684  |
| H  | 1.175259  | 1.965131  | 0.882070  |   |           |           |           |

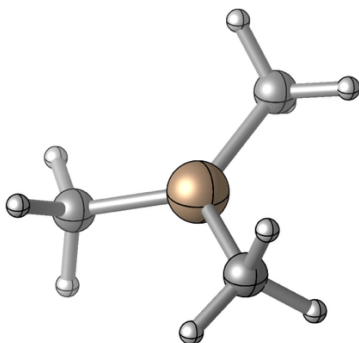

Zero-point correction= 0.108578 (Hartree/Particle)

|                                              |             |
|----------------------------------------------|-------------|
| Thermal correction to Energy=                | 0.116498    |
| Thermal correction to Enthalpy=              | 0.117442    |
| Thermal correction to Gibbs Free Energy=     | 0.075462    |
| Sum of electronic and zero-point Energies=   | -123.160246 |
| Sum of electronic and thermal Energies=      | -123.152326 |
| Sum of electronic and thermal Enthalpies=    | -123.151382 |
| Sum of electronic and thermal Free Energies= | -123.193362 |

### Fluoride

E(scf) = -99.6888339514 a.u.

F 0.000000 0.000000 0.000000

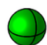

|                                 |                             |
|---------------------------------|-----------------------------|
| Zero-point correction=          | 0.000000 (Hartree/Particle) |
| Thermal correction to Energy=   | 0.001416                    |
| Thermal correction to Enthalpy= | 0.002360                    |

Thermal correction to Gibbs Free Energy= -0.014159  
Sum of electronic and zero-point Energies= -99.688834  
Sum of electronic and thermal Energies= -99.687418  
Sum of electronic and thermal Enthalpies= -99.686473  
Sum of electronic and thermal Free Energies= -99.702993

### Hydride

E(scf) = -0.488729315372 a.u.

H 0.000000 0.000000 0.000000

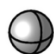

Zero-point correction= 0.000000 (Hartree/Particle)  
Thermal correction to Energy= 0.001416  
Thermal correction to Enthalpy= 0.002360  
Thermal correction to Gibbs Free Energy= -0.010000

|                                              |           |
|----------------------------------------------|-----------|
| Sum of electronic and zero-point Energies=   | -0.488729 |
| Sum of electronic and thermal Energies=      | -0.487313 |
| Sum of electronic and thermal Enthalpies=    | -0.486369 |
| Sum of electronic and thermal Free Energies= | -0.498729 |

### SiHMe<sub>3</sub>

E(scf) = -124.161825591 a.u.

|    |           |           |           |
|----|-----------|-----------|-----------|
| C  | 1.557001  | 0.899365  | 0.226095  |
| H  | 2.474390  | 0.401400  | -0.128958 |
| H  | 1.584612  | 1.942549  | -0.129765 |
| H  | 1.594436  | 0.921554  | 1.328195  |
| C  | 0.000408  | -1.798076 | 0.226077  |
| H  | 0.000914  | -1.841655 | 1.328177  |
| H  | -0.889497 | -2.343629 | -0.128995 |
| H  | 0.890070  | -2.343505 | -0.129789 |
| C  | -1.557395 | 0.898670  | 0.226101  |
| H  | -1.584932 | 1.942165  | -0.128857 |
| H  | -2.474581 | 0.400938  | -0.129800 |
| H  | -1.595306 | 0.919864  | 1.328202  |
| Si | -0.000014 | 0.000040  | -0.386833 |
| H  | 0.000010  | 0.000009  | -1.862388 |

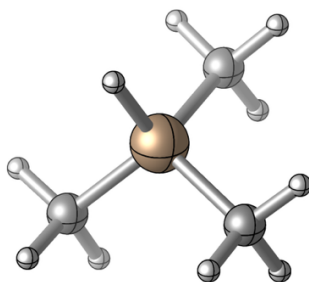

|                                              |                             |
|----------------------------------------------|-----------------------------|
| Zero-point correction=                       | 0.118803 (Hartree/Particle) |
| Thermal correction to Energy=                | 0.126256                    |
| Thermal correction to Enthalpy=              | 0.127200                    |
| Thermal correction to Gibbs Free Energy=     | 0.088538                    |
| Sum of electronic and zero-point Energies=   | -124.043022                 |
| Sum of electronic and thermal Energies=      | -124.035570                 |
| Sum of electronic and thermal Enthalpies=    | -124.034626                 |
| Sum of electronic and thermal Free Energies= | -124.073287                 |

**o-(C<sub>2</sub>B<sub>10</sub>H<sub>10</sub>)(SbPh<sub>2</sub>(diolate))<sub>2</sub>\_anionic**

E(scf) = -5705.72416999 a.u.

|    |           |           |           |    |           |           |           |
|----|-----------|-----------|-----------|----|-----------|-----------|-----------|
| Sb | 1.069985  | 1.771197  | -0.412157 | C  | 3.040044  | 0.637090  | -0.310149 |
| B  | 3.425071  | -0.426378 | -1.604462 | Sb | 1.038907  | -2.011593 | 0.266390  |
| Cl | -3.866215 | 2.750627  | -0.495047 | B  | 4.299825  | 1.110810  | -1.400578 |
| O  | -0.923811 | 2.300773  | -0.599527 | Cl | -5.505024 | 0.463745  | -1.997962 |

|    |           |           |           |   |           |           |           |
|----|-----------|-----------|-----------|---|-----------|-----------|-----------|
| O  | 0.369193  | 0.320786  | -1.733888 | C | -3.069525 | -0.611113 | -2.621798 |
| C  | 3.139041  | -0.981647 | -0.008603 | C | -1.661877 | -0.646472 | -2.572068 |
| Cl | -3.935625 | -1.878781 | -3.445189 | C | -0.956397 | 0.349788  | -1.893359 |
| B  | 4.410559  | 1.443640  | 0.338082  | C | 1.189537  | -4.024308 | -0.526033 |
| O  | 0.227652  | 0.244447  | 1.085874  | C | 1.266138  | -2.497821 | 2.361521  |
| O  | -1.057408 | -2.066673 | 0.231376  | C | -1.086187 | 0.058273  | 1.354024  |
| Cl | -0.745144 | -1.928675 | -3.314233 | C | -1.841456 | 0.926518  | 2.165581  |
| B  | 3.624947  | 0.098739  | 1.208491  | C | -3.236518 | 0.788051  | 2.295058  |
| Cl | -1.020041 | 2.170291  | 3.059999  | C | -3.891189 | -0.279898 | 1.663570  |
| B  | 4.420360  | -1.703026 | -0.868193 | C | -3.133673 | -1.235002 | 0.968987  |
| Cl | -4.149590 | 1.947858  | 3.223015  | C | -1.735668 | -1.110209 | 0.843925  |
| B  | 5.202635  | -0.376074 | -1.748468 | C | 1.515989  | -3.821302 | 2.760219  |
| Cl | -5.624294 | -0.425707 | 1.740404  | H | 1.603609  | -4.616733 | 2.017641  |
| B  | 5.815807  | 0.783962  | -0.530466 | C | 1.651359  | -4.148057 | 4.114128  |
| Cl | -3.890552 | -2.607479 | 0.208221  | H | 1.849174  | -5.184434 | 4.402307  |
| B  | 5.398245  | 0.166164  | 1.098065  | C | 1.528938  | -3.156971 | 5.091123  |
| C  | 1.656733  | 3.008273  | -2.068551 | H | 1.631739  | -3.411721 | 6.149777  |
| B  | 4.541175  | -1.382541 | 0.872141  | C | 1.266789  | -1.839265 | 4.706155  |
| C  | 1.260829  | 3.250418  | 1.133689  | H | 1.157572  | -1.055957 | 5.461279  |
| B  | 5.899000  | -0.963437 | -0.202298 | C | 1.135938  | -1.509676 | 3.353719  |
| C  | -3.052573 | 1.454562  | -1.324201 | H | 0.923998  | -0.477478 | 3.075603  |
| C  | -1.653973 | 1.420076  | -1.273437 | C | 2.038150  | 3.107135  | 2.287783  |
| C  | -3.763817 | 0.434872  | -1.989996 | H | 2.605852  | 2.197244  | 2.467307  |

|   |           |           |           |   |           |           |           |
|---|-----------|-----------|-----------|---|-----------|-----------|-----------|
| C | 2.062813  | 4.120449  | 3.250854  | H | 3.277785  | -4.358676 | -0.019829 |
| H | 2.668752  | 3.991912  | 4.151771  | C | 0.048501  | -4.578474 | -1.130408 |
| C | 1.307368  | 5.282159  | 3.069890  | H | -0.885343 | -4.012698 | -1.159208 |
| H | 1.321534  | 6.070205  | 3.828014  | C | 0.105537  | -5.859401 | -1.689604 |
| C | 0.525703  | 5.427597  | 1.920177  | H | -0.788459 | -6.283658 | -2.155338 |
| H | -0.080168 | 6.326254  | 1.775970  | C | 1.295864  | -6.593282 | -1.657174 |
| C | 0.500698  | 4.417025  | 0.955341  | H | 1.337151  | -7.592481 | -2.100072 |
| H | -0.140899 | 4.526330  | 0.079110  | C | 2.433536  | -6.045912 | -1.055995 |
| C | 2.342294  | 4.213079  | -1.853834 | H | 3.367359  | -6.614369 | -1.023275 |
| H | 2.586613  | 4.536905  | -0.839566 | H | 2.615707  | -0.636719 | -2.453429 |
| C | 1.378267  | 2.612227  | -3.385678 | H | 5.723013  | -0.550494 | -2.818134 |
| H | 0.869569  | 1.665585  | -3.572862 | H | 4.290090  | -2.817221 | -1.282817 |
| C | 1.773321  | 3.410185  | -4.464099 | H | 4.471783  | -2.277064 | 1.668259  |
| H | 1.551131  | 3.086789  | -5.484859 | H | 6.933475  | -1.577145 | -0.158288 |
| C | 2.454791  | 4.610231  | -4.240837 | H | 6.056200  | 0.386423  | 2.080304  |
| H | 2.766963  | 5.230870  | -5.085532 | H | 6.787638  | 1.466637  | -0.724081 |
| C | 2.740166  | 5.009689  | -2.932153 | H | 4.102827  | 1.993136  | -2.176380 |
| H | 3.279401  | 5.942902  | -2.746764 | H | 4.279699  | 2.561299  | 0.741898  |
| C | 2.381294  | -4.765762 | -0.493050 | H | 2.949132  | 0.229895  | 2.178269  |

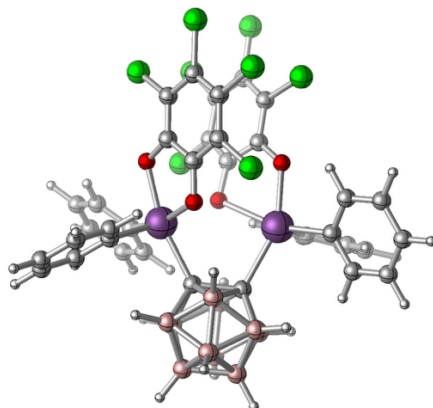

|                                              |                             |
|----------------------------------------------|-----------------------------|
| Zero-point correction=                       | 0.614531 (Hartree/Particle) |
| Thermal correction to Energy=                | 0.671034                    |
| Thermal correction to Enthalpy=              | 0.671978                    |
| Thermal correction to Gibbs Free Energy=     | 0.521879                    |
| Sum of electronic and zero-point Energies=   | -5705.109639                |
| Sum of electronic and thermal Energies=      | -5705.053136                |
| Sum of electronic and thermal Enthalpies=    | -5705.052192                |
| Sum of electronic and thermal Free Energies= | -5705.202291                |

**o-(C<sub>2</sub>B<sub>10</sub>H<sub>10</sub>)<sub>2</sub>(SbPh(diolate))<sub>2</sub>\_anionic**

E(scf) = -5573.39028536 a.u.

|    |           |           |           |    |           |           |           |
|----|-----------|-----------|-----------|----|-----------|-----------|-----------|
| Cl | 7.782147  | 2.030782  | -0.823428 | B  | 0.406483  | -1.003512 | 4.372227  |
| Cl | 6.156544  | -3.142542 | 0.059930  | B  | -0.639904 | 0.294767  | 3.737658  |
| Cl | 8.510677  | -1.010733 | -0.317495 | B  | 0.358329  | 1.720798  | 3.427382  |
| Sb | 1.590555  | -0.987354 | -0.183424 | B  | 2.046206  | 1.339596  | 3.857393  |
| Cl | 4.700552  | 2.901914  | -0.950936 | B  | 2.078221  | -0.354895 | 4.449315  |
| O  | 3.441503  | -1.867254 | -0.088884 | B  | 0.695908  | 0.697896  | 4.848341  |
| O  | 2.865521  | 0.587445  | -0.525483 | Sb | -1.919803 | 1.401783  | 0.786226  |
| C  | 1.221450  | -0.336070 | 1.831355  | Cl | -3.867587 | -3.364659 | 1.161516  |
| C  | -0.052957 | 0.643114  | 2.160519  | O  | -3.840434 | 1.546754  | -0.039842 |
| C  | -1.692536 | 3.598200  | 0.603109  | O  | -2.630829 | -0.692969 | 0.754637  |
| C  | 4.485910  | -1.046884 | -0.244100 | C  | -1.050021 | 1.032807  | -1.293262 |
| C  | 5.818992  | -1.456675 | -0.205161 | C  | 0.304369  | 0.100656  | -1.628545 |
| C  | 6.845436  | -0.502763 | -0.382639 | C  | 0.862156  | -2.984772 | -0.472690 |
| C  | 6.521983  | 0.847911  | -0.609842 | C  | -4.548618 | 0.424962  | -0.034604 |
| C  | 5.171304  | 1.253771  | -0.666097 | C  | -5.891584 | 0.383964  | -0.431918 |
| C  | 4.162343  | 0.306279  | -0.481475 | C  | -6.620834 | -0.822470 | -0.385866 |
| B  | 1.525139  | 1.319629  | 2.159884  | C  | -6.001916 | -1.991468 | 0.088097  |
| B  | 2.596822  | 0.025878  | 2.791665  | C  | -4.654607 | -1.952756 | 0.500117  |
| B  | 1.587032  | -1.414190 | 3.106209  | C  | -3.901529 | -0.769871 | 0.411209  |
| B  | -0.103204 | -1.007291 | 2.670362  | B  | -1.242279 | -0.509934 | -2.045477 |

|    |           |           |           |   |           |           |           |
|----|-----------|-----------|-----------|---|-----------|-----------|-----------|
| B  | -2.171193 | 0.896122  | -2.600946 | H | 0.431037  | 3.666182  | 1.065036  |
| B  | -1.141208 | 2.329133  | -2.419245 | C | -2.835993 | 4.360154  | 0.318698  |
| B  | 0.421458  | 1.808089  | -1.746910 | H | -3.792514 | 3.865887  | 0.132611  |
| B  | 0.267582  | 2.154934  | -3.489684 | C | -0.378769 | 5.632335  | 0.751141  |
| B  | 1.188863  | 0.736298  | -2.965740 | H | 0.584101  | 6.122403  | 0.919934  |
| B  | 0.157644  | -0.702396 | -3.134447 | C | -1.514280 | 6.391599  | 0.454199  |
| B  | -1.411647 | -0.192287 | -3.786040 | H | -1.443686 | 7.481007  | 0.390159  |
| B  | -1.343011 | 1.579447  | -4.020591 | C | -2.741025 | 5.753803  | 0.241262  |
| B  | 0.094877  | 0.591643  | -4.353261 | H | -3.632042 | 6.342990  | 0.005780  |
| Cl | -6.615361 | 1.866301  | -0.995237 | H | -0.131550 | 2.813097  | 3.419229  |
| Cl | -8.282876 | -0.854898 | -0.914830 | H | 1.861166  | 2.043160  | 1.278402  |
| Cl | -6.893635 | -3.489007 | 0.173218  | H | 2.805886  | 2.189029  | 4.236836  |
| C  | 1.727767  | -3.962751 | -0.990215 | H | 3.684342  | -0.095292 | 2.311444  |
| H  | 2.774158  | -3.729299 | -1.182717 | H | 2.876928  | -0.734102 | 5.263453  |
| C  | 1.246437  | -5.251352 | -1.235206 | H | 1.995222  | -2.502610 | 2.818129  |
| H  | 1.923718  | -6.008442 | -1.639099 | H | -0.016298 | -1.839877 | 5.123211  |
| C  | -0.087684 | -5.568625 | -0.964933 | H | 0.476426  | 1.097044  | 5.960976  |
| H  | -0.462712 | -6.576348 | -1.163178 | H | -1.816301 | 0.405685  | 3.937412  |
| C  | -0.941835 | -4.597562 | -0.438562 | H | -0.831335 | -1.769267 | 2.126204  |
| H  | -1.986087 | -4.829117 | -0.221904 | H | 1.029739  | 2.415277  | -0.927948 |
| C  | -0.474704 | -3.302364 | -0.189573 | H | 0.818964  | 3.113968  | -3.956633 |
| H  | -1.172480 | -2.571513 | 0.221666  | H | 2.377335  | 0.632274  | -2.973948 |
| C  | -0.467806 | 4.237929  | 0.832453  | H | 0.643981  | -1.794149 | -3.227358 |

|   |           |           |           |   |           |           |           |
|---|-----------|-----------|-----------|---|-----------|-----------|-----------|
| H | 0.540297  | 0.411440  | -5.455277 | H | -1.973177 | 2.139380  | -4.877348 |
| H | -2.075207 | -0.931067 | -4.461246 | H | -1.591544 | 3.369780  | -2.053564 |
| H | -3.337765 | 0.940542  | -2.371135 | H | -1.722222 | -1.402674 | -1.437283 |

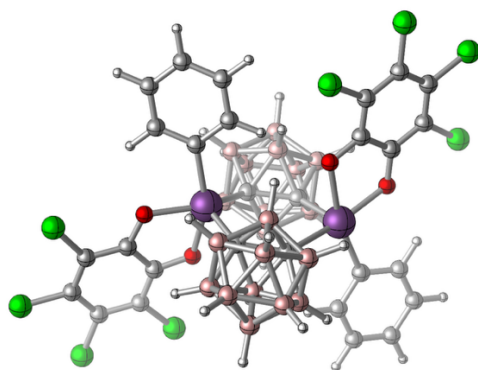

|                                              |                             |
|----------------------------------------------|-----------------------------|
| Zero-point correction=                       | 0.586497 (Hartree/Particle) |
| Thermal correction to Energy=                | 0.641343                    |
| Thermal correction to Enthalpy=              | 0.642287                    |
| Thermal correction to Gibbs Free Energy=     | 0.496738                    |
| Sum of electronic and zero-point Energies=   | -5572.803788                |
| Sum of electronic and thermal Energies=      | -5572.748942                |
| Sum of electronic and thermal Enthalpies=    | -5572.747998                |
| Sum of electronic and thermal Free Energies= | -5572.893547                |

**o-(C<sub>6</sub>F<sub>4</sub>)(SbPh<sub>2</sub>(diolate))<sub>2</sub>\_anionic**

E(scf) = -6002.53202530 a.u.

|    |           |           |           |    |           |           |           |
|----|-----------|-----------|-----------|----|-----------|-----------|-----------|
| Cl | -5.602546 | -0.202106 | -2.069022 | Sb | 0.764531  | 2.049650  | -0.129308 |
| Cl | -5.561212 | -1.071920 | 1.704859  | C  | 2.913101  | -0.276576 | 0.238080  |
| C  | 2.835196  | 1.094765  | -0.048869 | C  | 4.176543  | -0.867482 | 0.286683  |
| C  | 3.993187  | 1.816813  | -0.284335 | C  | 5.347427  | -0.133204 | 0.070712  |
| C  | 5.258028  | 1.227695  | -0.217679 | C  | 1.892359  | -2.674702 | 2.287654  |
| C  | 0.983226  | 2.632624  | -2.192436 | C  | 0.698675  | 4.060165  | 0.737178  |
| C  | 1.647416  | -3.067848 | -0.960350 | C  | -1.584485 | -1.576512 | 1.258336  |
| C  | -1.887753 | 0.922103  | -0.905858 | C  | -2.969414 | -1.774578 | 1.216357  |
| C  | -3.278714 | 0.884692  | -1.130145 | C  | -3.838439 | -0.841457 | 1.817312  |
| C  | -3.871867 | -0.150097 | -1.870936 | C  | -3.313927 | 0.281703  | 2.479117  |
| C  | -3.059473 | -1.137754 | -2.446842 | C  | -1.920072 | 0.484733  | 2.518647  |
| C  | -1.669319 | -1.115211 | -2.221279 | C  | -1.056356 | -0.423744 | 1.899744  |
| C  | -1.077908 | -0.163891 | -1.371339 | Cl | -3.567710 | -3.161391 | 0.350277  |
| Cl | -4.240774 | 2.157448  | -0.427006 | Cl | -4.377073 | 1.439670  | 3.231365  |
| Cl | -3.768409 | -2.398752 | -3.422321 | Cl | -1.219512 | 1.878030  | 3.294554  |
| Cl | -0.644746 | -2.262621 | -3.034842 | F  | 4.330511  | -2.184021 | 0.511867  |
| F  | 3.943935  | 3.127852  | -0.606051 | F  | 6.543004  | -0.725166 | 0.130950  |
| F  | 6.369681  | 1.933615  | -0.441203 | O  | -0.717644 | -2.377539 | 0.647546  |
| O  | -1.357682 | 1.931323  | -0.243268 | O  | 0.263057  | -0.232181 | 1.809713  |
| O  | 0.222721  | -0.196733 | -1.013072 | Sb | 1.197393  | -1.614182 | 0.542850  |

|   |           |          |           |   |          |           |           |
|---|-----------|----------|-----------|---|----------|-----------|-----------|
| C | 1.264264  | 3.390594 | -4.890709 | C | 2.833323 | -3.759502 | -2.960683 |
| H | 1.371702  | 3.684536 | -5.938881 | H | 3.543719 | -3.535635 | -3.761386 |
| C | 1.070170  | 4.362063 | -3.904849 | C | 2.565757 | -2.798884 | -1.980785 |
| H | 1.026588  | 5.420663 | -4.177246 | H | 3.060221 | -1.825955 | -2.038523 |
| C | 0.928759  | 3.984661 | -2.564662 | C | 0.992749 | -4.307474 | -0.928157 |
| H | 0.777993  | 4.757410 | -1.806241 | H | 0.240272 | -4.506407 | -0.162294 |
| C | 1.174275  | 1.662098 | -3.191082 | C | 1.265234 | -5.269870 | -1.904353 |
| H | 1.195354  | 0.603535 | -2.923634 | H | 0.743795 | -6.230697 | -1.878157 |
| C | 1.314164  | 2.040348 | -4.529893 | C | 2.184521 | -4.997458 | -2.922501 |
| H | 1.454505  | 1.271579 | -5.295189 | H | 2.389413 | -5.747409 | -3.691742 |
| C | -0.571838 | 4.557564 | 1.079445  | C | 1.673281 | -2.146024 | 3.570356  |
| H | -1.466678 | 3.972124 | 0.854988  | H | 1.163205 | -1.187025 | 3.677894  |
| C | 1.838984  | 4.815085 | 1.054693  | C | 2.106469 | -2.836866 | 4.707573  |
| H | 2.835364  | 4.453158 | 0.796808  | H | 1.927322 | -2.410746 | 5.698912  |
| C | 1.711156  | 6.054814 | 1.692901  | C | 2.761913 | -4.064598 | 4.579366  |
| H | 2.607444  | 6.635411 | 1.931280  | H | 3.097587 | -4.605265 | 5.469073  |
| C | 0.445653  | 6.550476 | 2.020784  | C | 2.988274 | -4.596441 | 3.306279  |
| H | 0.347168  | 7.518922 | 2.519796  | H | 3.504381 | -5.554385 | 3.194394  |
| C | -0.693211 | 5.799500 | 1.711216  | C | 2.558428 | -3.904345 | 2.169781  |
| H | -1.686981 | 6.177868 | 1.967819  | H | 2.756821 | -4.330032 | 1.183717  |

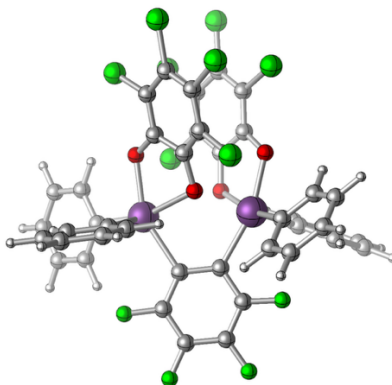

|                                              |                             |
|----------------------------------------------|-----------------------------|
| Zero-point correction=                       | 0.506255 (Hartree/Particle) |
| Thermal correction to Energy=                | 0.562995                    |
| Thermal correction to Enthalpy=              | 0.563939                    |
| Thermal correction to Gibbs Free Energy=     | 0.409312                    |
| Sum of electronic and zero-point Energies=   | -6002.025770                |
| Sum of electronic and thermal Energies=      | -6001.969030                |
| Sum of electronic and thermal Enthalpies=    | -6001.968086                |
| Sum of electronic and thermal Free Energies= | -6002.122713                |

**1,2-(SbPh)<sub>2</sub>-ortho-(C<sub>2</sub>B<sub>10</sub>H<sub>10</sub>)<sub>2</sub>\_anionic**

E(scf) = -1267.47867668 a.u.

|    |           |           |           |   |           |           |           |
|----|-----------|-----------|-----------|---|-----------|-----------|-----------|
| Sb | 1.697696  | -0.278688 | -0.869981 | C | -3.612697 | 1.001244  | -0.051407 |
| Sb | -1.765556 | 0.368599  | -1.017922 | B | 1.359699  | -1.279542 | 2.491580  |
| C  | 0.813716  | -0.218118 | 1.260932  | B | -1.277584 | 0.804208  | 2.728800  |
| C  | -0.813111 | -0.032440 | 1.308114  | B | 1.574945  | 0.475481  | 2.625201  |
| C  | 3.683372  | -0.859604 | -0.138307 | B | -1.489978 | -0.940171 | 2.587846  |

|   |           |           |           |   |           |           |           |
|---|-----------|-----------|-----------|---|-----------|-----------|-----------|
| B | 0.176026  | 1.249828  | 1.827816  | H | -2.802370 | -5.535086 | -2.070770 |
| B | -0.158211 | -1.572097 | 1.604837  | C | -3.122587 | -3.891367 | -0.692624 |
| B | 0.241412  | 1.130367  | 3.606085  | H | -3.661302 | -4.502032 | 0.038407  |
| B | -0.109975 | -1.745462 | 3.379920  | C | -2.907141 | -2.535231 | -0.430331 |
| C | 2.086789  | 1.835722  | -1.143629 | H | -3.264418 | -2.115914 | 0.511405  |
| C | -2.212055 | -1.718944 | -1.345322 | C | -4.817902 | 0.278031  | -0.118944 |
| B | 0.966082  | -0.456463 | 4.016933  | H | -4.839783 | -0.705763 | -0.594454 |
| B | -0.800596 | -0.249890 | 4.084167  | C | -6.004859 | 0.797881  | 0.408482  |
| C | 4.790652  | 0.002510  | -0.063065 | H | -6.925678 | 0.208750  | 0.351035  |
| H | 4.676903  | 1.064713  | -0.289626 | C | -6.019021 | 2.062077  | 1.007543  |
| C | 3.895645  | -2.224889 | 0.132617  | H | -6.946122 | 2.467389  | 1.423250  |
| H | 3.062911  | -2.932645 | 0.067428  | C | -4.833830 | 2.803174  | 1.066318  |
| C | 5.155605  | -2.706721 | 0.497739  | H | -4.828356 | 3.793241  | 1.532474  |
| H | 5.287581  | -3.770364 | 0.717691  | C | -3.649276 | 2.278538  | 0.541909  |
| C | 6.243155  | -1.830944 | 0.585622  | H | -2.735576 | 2.877266  | 0.609454  |
| H | 7.230628  | -2.203886 | 0.872543  | C | 1.704552  | 2.410424  | -2.370401 |
| C | 6.056035  | -0.475991 | 0.297378  | H | 1.232723  | 1.791052  | -3.140292 |
| H | 6.899855  | 0.218444  | 0.356656  | C | 2.665141  | 2.674463  | -0.172211 |
| C | -1.728713 | -2.321809 | -2.524905 | H | 2.945273  | 2.271080  | 0.802157  |
| H | -1.174909 | -1.722024 | -3.255289 | C | 2.866535  | 4.034618  | -0.425975 |
| C | -1.934139 | -3.679067 | -2.784420 | H | 3.313383  | 4.666741  | 0.347078  |
| H | -1.541866 | -4.120930 | -3.705712 | C | 2.487746  | 4.589164  | -1.653234 |
| C | -2.638427 | -4.472474 | -1.869800 | H | 2.641839  | 5.654258  | -1.848541 |

|   |           |           |           |   |           |           |          |
|---|-----------|-----------|-----------|---|-----------|-----------|----------|
| C | 1.901773  | 3.770868  | -2.625370 | H | 2.671969  | 0.946871  | 2.505894 |
| H | 1.591431  | 4.194063  | -3.585373 | H | 0.260087  | 2.238797  | 1.158689 |
| H | 2.303824  | -1.984394 | 2.287430  | H | 0.381950  | 2.118201  | 4.282154 |
| H | -0.267823 | -2.439047 | 0.785775  | H | -2.226175 | 1.532369  | 2.703569 |
| H | -0.211895 | -2.830960 | 3.893218  | H | -1.422528 | -0.254001 | 5.117192 |
| H | 1.649259  | -0.618446 | 4.996968  | H | -2.590813 | -1.401197 | 2.466454 |

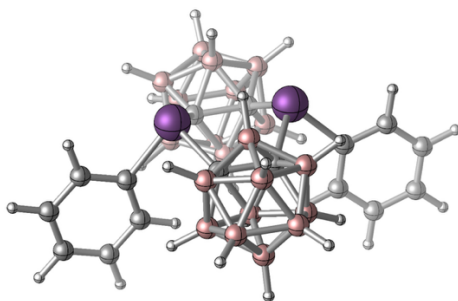

|                                              |                             |
|----------------------------------------------|-----------------------------|
| Zero-point correction=                       | 0.512834 (Hartree/Particle) |
| Thermal correction to Energy=                | 0.546735                    |
| Thermal correction to Enthalpy=              | 0.547679                    |
| Thermal correction to Gibbs Free Energy=     | 0.441904                    |
| Sum of electronic and zero-point Energies=   | -1266.965843                |
| Sum of electronic and thermal Energies=      | -1266.931942                |
| Sum of electronic and thermal Enthalpies=    | -1266.930998                |
| Sum of electronic and thermal Free Energies= | -1267.036773                |

**1,2-(SbPh<sub>2</sub>)<sub>2</sub>-ortho-(C<sub>2</sub>B<sub>10</sub>H<sub>10</sub>)<sub>-</sub>anionic**

E(scf) = -1267.47867668 a.u.

|    |           |           |           |   |           |           |           |
|----|-----------|-----------|-----------|---|-----------|-----------|-----------|
| Sb | 1.697696  | -0.278688 | -0.869981 | C | 3.895645  | -2.224889 | 0.132617  |
| Sb | -1.765556 | 0.368599  | -1.017922 | H | 3.062911  | -2.932645 | 0.067428  |
| C  | 0.813716  | -0.218118 | 1.260932  | C | 5.155605  | -2.706721 | 0.497739  |
| C  | -0.813111 | -0.032440 | 1.308114  | H | 5.287581  | -3.770364 | 0.717691  |
| C  | 3.683372  | -0.859604 | -0.138307 | C | 6.243155  | -1.830944 | 0.585622  |
| C  | -3.612697 | 1.001244  | -0.051407 | H | 7.230628  | -2.203886 | 0.872543  |
| B  | 1.359699  | -1.279542 | 2.491580  | C | 6.056035  | -0.475991 | 0.297378  |
| B  | -1.277584 | 0.804208  | 2.728800  | H | 6.899855  | 0.218444  | 0.356656  |
| B  | 1.574945  | 0.475481  | 2.625201  | C | -1.728713 | -2.321809 | -2.524905 |
| B  | -1.489978 | -0.940171 | 2.587846  | H | -1.174909 | -1.722024 | -3.255289 |
| B  | 0.176026  | 1.249828  | 1.827816  | C | -1.934139 | -3.679067 | -2.784420 |
| B  | -0.158211 | -1.572097 | 1.604837  | H | -1.541866 | -4.120930 | -3.705712 |
| B  | 0.241412  | 1.130367  | 3.606085  | C | -2.638427 | -4.472474 | -1.869800 |
| B  | -0.109975 | -1.745462 | 3.379920  | H | -2.802370 | -5.535086 | -2.070770 |
| C  | 2.086789  | 1.835722  | -1.143629 | C | -3.122587 | -3.891367 | -0.692624 |
| C  | -2.212055 | -1.718944 | -1.345322 | H | -3.661302 | -4.502032 | 0.038407  |
| B  | 0.966082  | -0.456463 | 4.016933  | C | -2.907141 | -2.535231 | -0.430331 |
| B  | -0.800596 | -0.249890 | 4.084167  | H | -3.264418 | -2.115914 | 0.511405  |
| C  | 4.790652  | 0.002510  | -0.063065 | C | -4.817902 | 0.278031  | -0.118944 |
| H  | 4.676903  | 1.064713  | -0.289626 | H | -4.839783 | -0.705763 | -0.594454 |

|   |           |           |           |   |           |           |          |
|---|-----------|-----------|-----------|---|-----------|-----------|----------|
| C | -6.004859 | 0.797881  | 0.408482  | H | 0.260087  | 2.238797  | 1.158689 |
| H | -6.925678 | 0.208750  | 0.351035  | H | 0.381950  | 2.118201  | 4.282154 |
| C | -6.019021 | 2.062077  | 1.007543  | H | -2.226175 | 1.532369  | 2.703569 |
| H | -6.946122 | 2.467389  | 1.423250  | H | -1.422528 | -0.254001 | 5.117192 |
| C | -4.833830 | 2.803174  | 1.066318  | H | -2.590813 | -1.401197 | 2.466454 |
| H | -4.828356 | 3.793241  | 1.532474  |   |           |           |          |
| C | -3.649276 | 2.278538  | 0.541909  |   |           |           |          |
| H | -2.735576 | 2.877266  | 0.609454  |   |           |           |          |
| C | 1.704552  | 2.410424  | -2.370401 |   |           |           |          |
| H | 1.232723  | 1.791052  | -3.140292 |   |           |           |          |
| C | 2.665141  | 2.674463  | -0.172211 |   |           |           |          |
| H | 2.945273  | 2.271080  | 0.802157  |   |           |           |          |
| C | 2.866535  | 4.034618  | -0.425975 |   |           |           |          |
| H | 3.313383  | 4.666741  | 0.347078  |   |           |           |          |
| C | 2.487746  | 4.589164  | -1.653234 |   |           |           |          |
| H | 2.641839  | 5.654258  | -1.848541 |   |           |           |          |
| C | 1.901773  | 3.770868  | -2.625370 |   |           |           |          |
| H | 1.591431  | 4.194063  | -3.585373 |   |           |           |          |
| H | 2.303824  | -1.984394 | 2.287430  |   |           |           |          |
| H | -0.267823 | -2.439047 | 0.785775  |   |           |           |          |
| H | -0.211895 | -2.830960 | 3.893218  |   |           |           |          |
| H | 1.649259  | -0.618446 | 4.996968  |   |           |           |          |
| H | 2.671969  | 0.946871  | 2.505894  |   |           |           |          |

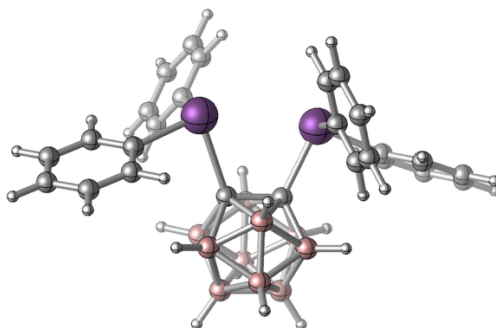

|                                              |                             |
|----------------------------------------------|-----------------------------|
| Zero-point correction=                       | 0.512834 (Hartree/Particle) |
| Thermal correction to Energy=                | 0.546735                    |
| Thermal correction to Enthalpy=              | 0.547679                    |
| Thermal correction to Gibbs Free Energy=     | 0.441904                    |
| Sum of electronic and zero-point Energies=   | -1266.965843                |
| Sum of electronic and thermal Energies=      | -1266.931942                |
| Sum of electronic and thermal Enthalpies=    | -1266.930998                |
| Sum of electronic and thermal Free Energies= | -1267.036773                |

**o-(C<sub>2</sub>B<sub>10</sub>H<sub>10</sub>)(SbPh<sub>2</sub>Cl)<sub>2</sub>O\_FIA**

E(scf) = -2262.87697761 a.u.

|   |          |           |           |   |           |           |           |
|---|----------|-----------|-----------|---|-----------|-----------|-----------|
| C | 4.905847 | -2.984829 | 1.003040  | H | 2.679184  | -4.825543 | -0.812978 |
| H | 5.900307 | -3.055704 | 1.454971  | C | -2.597643 | -4.156383 | 2.925597  |
| C | 4.374049 | -4.076756 | 0.308147  | H | -2.755768 | -4.976818 | 3.631458  |
| H | 4.948071 | -5.003780 | 0.216534  | C | -3.687289 | -3.419341 | 2.451738  |
| C | 3.102766 | -3.976533 | -0.266728 | H | -4.700474 | -3.659284 | 2.786011  |

|    |           |           |           |   |           |           |           |
|----|-----------|-----------|-----------|---|-----------|-----------|-----------|
| C  | -3.491401 | -2.367481 | 1.550741  | H | -2.914301 | 0.413629  | -5.314143 |
| H  | -4.341317 | -1.792819 | 1.180317  | C | -2.477687 | 0.001240  | -3.240781 |
| Sb | 1.702947  | 0.189572  | 0.775738  | H | -3.199408 | 0.728375  | -2.865743 |
| Sb | -1.768240 | -0.435106 | -0.229168 | C | -2.195593 | -2.049198 | 1.122538  |
| Cl | 3.530874  | 1.457018  | 2.179402  | C | -1.100789 | -2.786729 | 1.599533  |
| Cl | -4.264790 | 0.046539  | -0.499269 | H | -0.093569 | -2.532518 | 1.269543  |
| O  | 0.143555  | -0.745806 | -0.137004 | C | -1.305427 | -3.838993 | 2.497210  |
| C  | -0.005424 | 1.919574  | 1.093146  | H | -0.445337 | -4.406605 | 2.862346  |
| C  | 1.870362  | 0.602037  | -2.274556 | B | -0.659827 | 2.671177  | -0.294262 |
| H  | 1.168182  | -0.230203 | -2.259385 | H | -0.282751 | 2.340677  | -1.379213 |
| C  | 2.899815  | -1.691313 | 0.544658  | C | -1.539877 | 1.561108  | 0.650498  |
| C  | 4.171508  | -1.798587 | 1.125065  | C | 2.373841  | 1.102341  | -1.065272 |
| H  | 4.588355  | -0.947441 | 1.671710  | C | 3.264056  | 2.184307  | -1.096934 |
| C  | 2.369224  | -2.789665 | -0.147021 | H | 3.673207  | 2.572170  | -0.161584 |
| H  | 1.376816  | -2.707616 | -0.595016 | C | 3.632035  | 2.760864  | -2.318518 |
| C  | -1.710324 | -0.753195 | -2.345661 | H | 4.321512  | 3.610377  | -2.328117 |
| C  | -0.805690 | -1.708419 | -2.830465 | C | 3.120566  | 2.260586  | -3.519900 |
| H  | -0.182220 | -2.271411 | -2.134674 | H | 3.406336  | 2.717120  | -4.472380 |
| C  | -0.678669 | -1.915433 | -4.207175 | C | 2.239851  | 1.174501  | -3.495241 |
| H  | 0.024250  | -2.666191 | -4.578116 | H | 1.827516  | 0.772989  | -4.425821 |
| C  | -1.432109 | -1.150060 | -5.103088 | B | 0.310555  | 3.575560  | 0.885172  |
| H  | -1.320568 | -1.300541 | -6.180532 | H | 1.411649  | 3.917965  | 0.565259  |
| C  | -2.326370 | -0.190934 | -4.618235 | B | 0.007166  | 2.890144  | 2.492020  |

|   |           |          |           |
|---|-----------|----------|-----------|
| H | 0.908043  | 2.756667 | 3.268696  |
| B | -1.148064 | 1.559435 | 2.306936  |
| H | -1.078878 | 0.510902 | 2.884224  |
| B | -2.390017 | 2.935990 | 0.094367  |
| H | -3.197914 | 2.806152 | -0.777091 |
| B | -1.217826 | 4.264804 | 0.265155  |
| H | -1.231615 | 5.203406 | -0.487645 |
| B | -0.806493 | 4.401049 | 2.006539  |
| H | -0.515539 | 5.454162 | 2.512604  |
| B | -1.715024 | 3.137132 | 2.899409  |
| H | -2.085096 | 3.265414 | 4.037220  |
| B | -2.694842 | 2.241453 | 1.712945  |

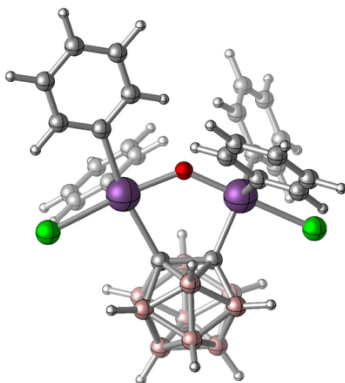

|                                              |                             |
|----------------------------------------------|-----------------------------|
| Zero-point correction=                       | 0.520819 (Hartree/Particle) |
| Thermal correction to Energy=                | 0.558694                    |
| Thermal correction to Enthalpy=              | 0.559638                    |
| Thermal correction to Gibbs Free Energy=     | 0.447347                    |
| Sum of electronic and zero-point Energies=   | -2262.356158                |
| Sum of electronic and thermal Energies=      | -2262.318284                |
| Sum of electronic and thermal Enthalpies=    | -2262.317340                |
| Sum of electronic and thermal Free Energies= | -2262.429630                |

## VI. Crystallographic Structure Determination

Crystallographic data for the structures reported in this paper have been deposited with the Cambridge Crystallographic Data Centre. CCDC entries listed below contain the supplementary crystallographic data for this paper. These data can be obtained free of charge from The Cambridge Crystallographic Data Centre via [www.ccdc.cam.ac.uk/structures](http://www.ccdc.cam.ac.uk/structures).

### [1,2-(SbCl)<sub>2</sub>-*ortho*-(C<sub>2</sub>B<sub>10</sub>H<sub>10</sub>)<sub>2</sub>]

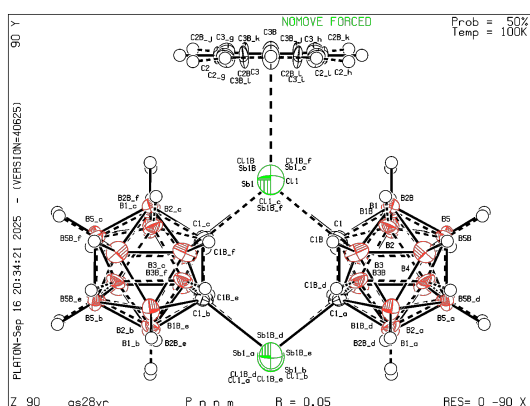

displacement parameters. All C-bound hydrogen atoms were refined isotropic on calculated positions using a riding model with their  $U_{\text{iso}}$  values constrained to 1.5 times the  $U_{\text{eq}}$  of their pivot atoms for terminal  $\text{sp}^3$  carbon atoms and 1.2 times for all other carbon atoms. Disordered moieties were refined using bond lengths restraints and displacement parameter restraints. This report and the CIF file were generated using FinalCif.<sup>[17]</sup>

**Table S7.** Crystal data and structure refinement for [1,2-(SbCl)<sub>2</sub>-*ortho*-(C<sub>2</sub>B<sub>10</sub>H<sub>10</sub>)<sub>2</sub>]

|                          |                                                                                 |
|--------------------------|---------------------------------------------------------------------------------|
| CCDC number              | 2514934                                                                         |
| Empirical formula        | C <sub>10</sub> H <sub>26</sub> B <sub>20</sub> Cl <sub>2</sub> Sb <sub>2</sub> |
| Formula weight           | 676.91                                                                          |
| Temperature [K]          | 100(2)                                                                          |
| Crystal system           | orthorhombic                                                                    |
| Space group<br>(number)  | <i>Pnmm</i> (58)                                                                |
| <i>a</i> [Å]             | 6.8546(19)                                                                      |
| <i>b</i> [Å]             | 10.786(3)                                                                       |
| <i>c</i> [Å]             | 17.373(5)                                                                       |
| $\alpha$ [°]             | 90                                                                              |
| $\beta$ [°]              | 90                                                                              |
| $\gamma$ [°]             | 90                                                                              |
| Volume [Å <sup>3</sup> ] | 1284.4(6)                                                                       |
| <i>Z</i>                 | 2                                                                               |

|                                            |                                                                  |
|--------------------------------------------|------------------------------------------------------------------|
| $\rho_{\text{calc}}$ [gcm <sup>-3</sup> ]  | 1.750                                                            |
| $\mu$ [mm <sup>-1</sup> ]                  | 2.314                                                            |
| $F(000)$                                   | 644                                                              |
| Crystal size [mm <sup>3</sup> ]            | 0.025×0.091×0.095                                                |
| Crystal colour                             | colourless                                                       |
| Crystal shape                              | plate                                                            |
| Radiation                                  | MoK $\alpha$ ( $\lambda=0.71073$ Å)                              |
| 2 $\theta$ range [°]                       | 4.45 to 50.02 (0.84 Å)                                           |
| Index ranges                               | -7 ≤ h ≤ 8<br>-12 ≤ k ≤ 12<br>-20 ≤ l ≤ 18                       |
| Reflections collected                      | 7613                                                             |
| Independent reflections                    | 1179<br>$R_{\text{int}} = 0.0896$<br>$R_{\text{sigma}} = 0.0592$ |
| Completeness to<br>$\theta = 25.012^\circ$ | 99.8 %                                                           |
| Data / Restraints /<br>Parameters          | 1179 / 294 / 163                                                 |
| Absorption correction                      | 0.6335 / 0.7452                                                  |
| $T_{\text{min}}/T_{\text{max}}$ (method)   | (multi-scan)                                                     |
| Goodness-of-fit on $F^2$                   | 1.087                                                            |



displacement parameters. All C-bound hydrogen atoms were refined isotropic on calculated positions using a riding model with their  $U_{\text{iso}}$  values constrained to 1.5 times the  $U_{\text{eq}}$  of their pivot atoms for terminal  $\text{sp}^3$  carbon atoms and 1.2 times for all other carbon atoms. This report and the CIF file were generated using FinalCif.<sup>[17]</sup>

**Table S8.** Crystal data and structure refinement for 1,2-(SbPh)<sub>2</sub>-*ortho*-(C<sub>2</sub>B<sub>10</sub>H<sub>10</sub>)<sub>2</sub>

|                                           |                                                                 |
|-------------------------------------------|-----------------------------------------------------------------|
| CCDC number                               | 2514935                                                         |
| Empirical formula                         | C <sub>16</sub> H <sub>30</sub> B <sub>20</sub> Sb <sub>2</sub> |
| Formula weight                            | 682.10                                                          |
| Temperature [K]                           | 100(2)                                                          |
| Crystal system                            | orthorhombic                                                    |
| Space group<br>(number)                   | <i>Cmc</i> 2 <sub>1</sub> (36)                                  |
| <i>a</i> [Å]                              | 14.641(3)                                                       |
| <i>b</i> [Å]                              | 19.230(4)                                                       |
| <i>c</i> [Å]                              | 9.7810(19)                                                      |
| $\alpha$ [°]                              | 90                                                              |
| $\beta$ [°]                               | 90                                                              |
| $\gamma$ [°]                              | 90                                                              |
| Volume [Å <sup>3</sup> ]                  | 2753.7(9)                                                       |
| <i>Z</i>                                  | 4                                                               |
| $\rho_{\text{calc}}$ [gcm <sup>-3</sup> ] | 1.645                                                           |

|                                                                   |                                                                  |
|-------------------------------------------------------------------|------------------------------------------------------------------|
| $\mu$ [mm <sup>-1</sup> ]                                         | 1.972                                                            |
| $F(000)$                                                          | 1312                                                             |
| Crystal size [mm <sup>3</sup> ]                                   | 0.051×0.078×0.206                                                |
| Crystal colour                                                    | colorless                                                        |
| Crystal shape                                                     | rod                                                              |
| Radiation                                                         | MoK $\alpha$ ( $\lambda=0.71073$ Å)                              |
| 2 $\theta$ range [°]                                              | 4.24 to 56.67 (0.75 Å)                                           |
| Index ranges                                                      | -19 ≤ h ≤ 19<br>-25 ≤ k ≤ 25<br>-13 ≤ l ≤ 13                     |
| Reflections collected                                             | 21445                                                            |
| Independent reflections                                           | 3562<br>$R_{\text{int}} = 0.0318$<br>$R_{\text{sigma}} = 0.0218$ |
| Completeness to $\theta = 25.242^\circ$                           | 99.9 %                                                           |
| Data / Restraints / Parameters                                    | 3562 / 1 / 185                                                   |
| Absorption correction<br>$T_{\text{min}}/T_{\text{max}}$ (method) | 0.6702 / 0.7457<br>(multi-scan)                                  |
| Goodness-of-fit on $F^2$                                          | 1.067                                                            |
| Final $R$ indexes<br>[ $I \geq 2\sigma(I)$ ]                      | $R_1 = 0.0196$<br>$wR_2 = 0.0436$                                |
| Final $R$ indexes<br>[all data]                                   | $R_1 = 0.0244$<br>$wR_2 = 0.0449$                                |
| Largest peak/hole<br>[eÅ <sup>-3</sup> ]                          | 0.50/-0.29                                                       |
| Flack X parameter                                                 | 0.05(3)                                                          |

## 1,2-(SbPh<sub>2</sub>)<sub>2</sub>-*ortho*-(C<sub>2</sub>B<sub>10</sub>H<sub>10</sub>) [2a]

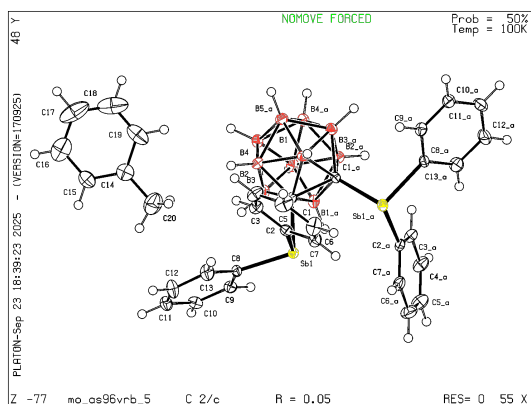

A colorless, block-shaped crystal was mounted on the goniometer. Data for 1,2-(SbPh<sub>2</sub>)<sub>2</sub>-*ortho*-(C<sub>2</sub>B<sub>10</sub>H<sub>10</sub>) was collected from a shock-cooled single crystal at 100(2)K on a Bruker Prospector three-circle diffractometer with a sealed X-ray tube using a Triumph graphite monochromator and a Bruker Apex-II CCD detector. The diffractometer was equipped with an Oxford Cryostream 700 low temperature device and used MoK<sub>α</sub> radiation ( $\lambda = 0.71073 \text{ \AA}$ ). All data were integrated with SAINT V8.41 and a multi-scan absorption correction using TWINABS Bruker was applied.<sup>[13,14]</sup> The structure was solved by dual space methods with SHELXD and refined by full-matrix least-squares methods against  $F^2$  using SHELXL-2019/2.<sup>[15,16]</sup> All non-hydrogen atoms were refined with anisotropic

displacement parameters. All C-bound hydrogen atoms were refined isotropic on calculated positions using a riding model with their  $U_{\text{iso}}$  values constrained to 1.5 times the  $U_{\text{eq}}$  of their pivot atoms for terminal  $\text{sp}^3$  carbon atoms and 1.2 times for all other carbon atoms. This report and the CIF file were generated using FinalCif.<sup>[17]</sup>

**Table S9.** Crystal data and structure refinement for 1,2-(SbPh<sub>2</sub>)<sub>2</sub>-*ortho*-(C<sub>2</sub>B<sub>10</sub>H<sub>10</sub>)

|                          |                                                                 |
|--------------------------|-----------------------------------------------------------------|
| CCDC number              | 2514937                                                         |
| Empirical formula        | C <sub>40</sub> H <sub>46</sub> B <sub>10</sub> Sb <sub>2</sub> |
| Formula weight           | 878.37                                                          |
| Temperature [K]          | 100(2)                                                          |
| Crystal system           | monoclinic                                                      |
| Space group<br>(number)  | <i>C</i> 2/ <i>c</i> (15)                                       |
| <i>a</i> [Å]             | 28.040(2)                                                       |
| <i>b</i> [Å]             | 9.8956(8)                                                       |
| <i>c</i> [Å]             | 19.6271(15)                                                     |
| $\alpha$ [°]             | 90                                                              |
| $\beta$ [°]              | 133.3752(15)                                                    |
| $\gamma$ [°]             | 90                                                              |
| Volume [Å <sup>3</sup> ] | 3958.6(5)                                                       |

|                                                                   |                                                                  |
|-------------------------------------------------------------------|------------------------------------------------------------------|
| Z                                                                 | 4                                                                |
| $\rho_{\text{calc}}$ [gcm <sup>-3</sup> ]                         | 1.474                                                            |
| $\mu$ [mm <sup>-1</sup> ]                                         | 1.394                                                            |
| F(000)                                                            | 1752                                                             |
| Crystal size [mm <sup>3</sup> ]                                   | 0.120×0.235×0.250                                                |
| Crystal colour                                                    | colorless                                                        |
| Crystal shape                                                     | block                                                            |
| Radiation                                                         | MoK $\alpha$<br>( $\lambda=0.71073$ Å)                           |
| 2 $\theta$ range [°]                                              | 4.00 to 50.04<br>(0.84 Å)                                        |
| Index ranges                                                      | -33 ≤ h ≤ 24<br>0 ≤ k ≤ 11<br>0 ≤ l ≤ 23                         |
| Reflections collected                                             | 9412                                                             |
| Independent reflections                                           | 9412<br>$R_{\text{int}} = 0.0574$<br>$R_{\text{sigma}} = 0.0250$ |
| Completeness to $\theta = 25.018^\circ$                           | 99.9 %                                                           |
| Data / Restraints / Parameters                                    | 9412 / 0 / 237                                                   |
| Absorption correction<br>$T_{\text{min}}/T_{\text{max}}$ (method) | 0.6812 / 0.7461<br>(multi-scan)                                  |
| Goodness-of-fit on $F^2$                                          | 1.206                                                            |
| Final $R$ indexes [ $I \geq 2\sigma(I)$ ]                         | $R_1 = 0.0455$<br>$wR_2 = 0.1042$                                |
| Final $R$ indexes [all data]                                      | $R_1 = 0.0520$<br>$wR_2 = 0.1085$                                |

|                                          |            |
|------------------------------------------|------------|
| Largest peak/hole<br>[eÅ <sup>-3</sup> ] | 1.60/-0.60 |
|------------------------------------------|------------|

### ***o*-(C<sub>2</sub>B<sub>10</sub>H<sub>10</sub>)<sub>2</sub>(SbPh(diolate))<sub>2</sub> [1b]**

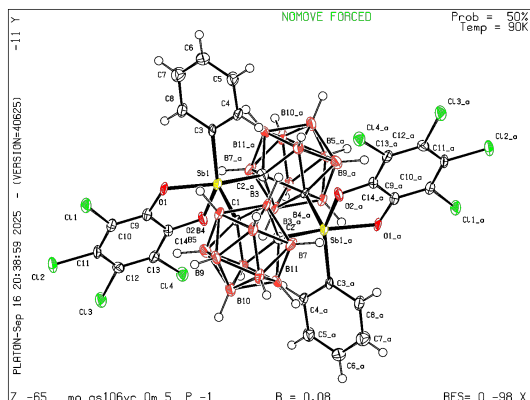

A yellow, block-shaped crystal was mounted on the goniometer. Data for *o*-(C<sub>2</sub>B<sub>10</sub>H<sub>10</sub>)<sub>2</sub>(SbPh(diolate))<sub>2</sub> was collected from a shock-cooled single crystal at 90(2) K on a Bruker Prospector three-circle diffractometer with a sealed X-ray tube using a Triumph monochromator and a Bruker Apex-II CCD detector. The diffractometer was equipped with an Oxford Cryostream 700 low temperature device and used MoK<sub>α</sub> radiation ( $\lambda = 0.71073 \text{ \AA}$ ). All data were integrated with SAINT V8.41 and a multi-scan absorption correction using TWINABS Bruker was applied.<sup>[13,14]</sup> The structure was solved by direct methods with SHELXT 2018/2 and refined by full-matrix least-squares methods against  $F^2$  using SHELXL-2019/2.<sup>[15,16]</sup> All non-hydrogen atoms were refined with anisotropic displacement parameters. All C-bound hydrogen atoms were refined isotropic on calculated positions using a riding model with their  $U_{\text{iso}}$  values constrained to 1.5 times the  $U_{\text{eq}}$  of their pivot atoms for terminal sp<sup>3</sup> carbon atoms and 1.2 times for all other carbon atoms. This report and the CIF file were generated using FinalCif.<sup>[17]</sup>

**Table S10.** Crystal data and structure refinement for  $o\text{-(C}_2\text{B}_{10}\text{H}_{10})_2\text{(SbPh(diolate))}_2$ 

|                                           |                                                                           |
|-------------------------------------------|---------------------------------------------------------------------------|
| CCDC number                               | 2514933                                                                   |
| Empirical formula                         | $\text{C}_{28}\text{H}_{30}\text{B}_{20}\text{Cl}_8\text{O}_4\text{Sb}_2$ |
| Formula weight                            | 1173.82                                                                   |
| Temperature [K]                           | 90(2)                                                                     |
| Crystal system                            | triclinic                                                                 |
| Space group<br>(number)                   | $P\bar{1}$ (2)                                                            |
| $a$ [Å]                                   | 9.619(8)                                                                  |
| $b$ [Å]                                   | 10.826(9)                                                                 |
| $c$ [Å]                                   | 12.050(10)                                                                |
| $\alpha$ [°]                              | 106.922(8)                                                                |
| $\beta$ [°]                               | 105.428(8)                                                                |
| $\gamma$ [°]                              | 99.219(8)                                                                 |
| Volume [Å <sup>3</sup> ]                  | 1118.3(16)                                                                |
| $Z$                                       | 1                                                                         |
| $\rho_{\text{calc}}$ [gcm <sup>-3</sup> ] | 1.743                                                                     |
| $\mu$ [mm <sup>-1</sup> ]                 | 1.723                                                                     |
| $F(000)$                                  | 568                                                                       |
| Crystal size [mm <sup>3</sup> ]           | 0.096×0.106×0.251                                                         |
| Crystal colour                            | yellow                                                                    |
| Crystal shape                             | block                                                                     |

|                                                 |                                                                          |
|-------------------------------------------------|--------------------------------------------------------------------------|
| Radiation                                       | MoK $\alpha$ ( $\lambda=0.71073$ Å)                                      |
| 2 $\theta$ range [°]                            | 3.74 to 50.23 (0.84 Å)                                                   |
| Index ranges                                    | -11 $\leq$ h $\leq$ 10<br>-12 $\leq$ k $\leq$ 12<br>0 $\leq$ l $\leq$ 14 |
| Reflections collected                           | 8172                                                                     |
| Independent reflections                         | 8172<br>$R_{\text{int}} = 0.1262$<br>$R_{\text{sigma}} = 0.0864$         |
| Completeness to $\theta = 25.114^\circ$         | 98.8 %                                                                   |
| Data / Restraints / Parameters                  | 8172 / 0 / 281                                                           |
| Absorption correction                           | 0.2986 / 0.4900                                                          |
| T <sub>min</sub> /T <sub>max</sub> (method)     | (multi-scan)                                                             |
| Goodness-of-fit on $F^2$                        | 0.999                                                                    |
| Final $R$ indexes [ $I \geq 2\sigma(I)$ ]       | $R_1 = 0.0817$<br>$wR_2 = 0.2062$                                        |
| Final $R$ indexes [all data]                    | $R_1 = 0.1222$<br>$wR_2 = 0.2419$                                        |
| Largest peak/hole [ $\text{e}\text{\AA}^{-3}$ ] | 2.39/-2.26                                                               |



**Table S11.** Crystal data and structure refinement for *o*-(C<sub>2</sub>B<sub>10</sub>H<sub>10</sub>)(SbPh<sub>2</sub>(diolate))<sub>2</sub>

|                                           |                                                                                                |
|-------------------------------------------|------------------------------------------------------------------------------------------------|
| CCDC number                               | 2514941                                                                                        |
| Empirical formula                         | C <sub>38</sub> H <sub>30</sub> B <sub>10</sub> Cl <sub>8</sub> O <sub>4</sub> Sb <sub>2</sub> |
| Formula weight                            | 1185.82                                                                                        |
| Temperature [K]                           | 100(2)                                                                                         |
| Crystal system                            | orthorhombic                                                                                   |
| Space group<br>(number)                   | <i>Pbcn</i> (60)                                                                               |
| <i>a</i> [Å]                              | 34.498(5)                                                                                      |
| <i>b</i> [Å]                              | 17.707(3)                                                                                      |
| <i>c</i> [Å]                              | 14.599(2)                                                                                      |
| $\alpha$ [°]                              | 90                                                                                             |
| $\beta$ [°]                               | 90                                                                                             |
| $\gamma$ [°]                              | 90                                                                                             |
| Volume [Å <sup>3</sup> ]                  | 8918(2)                                                                                        |
| <i>Z</i>                                  | 8                                                                                              |
| $\rho_{\text{calc}}$ [gcm <sup>-3</sup> ] | 1.766                                                                                          |
| $\mu$ [mm <sup>-1</sup> ]                 | 1.733                                                                                          |
| <i>F</i> (000)                            | 4624                                                                                           |
| Crystal size [mm <sup>3</sup> ]           | 0.144×0.222×0.336                                                                              |
| Crystal colour                            | colorless                                                                                      |
| Crystal shape                             | block                                                                                          |

|                                                                   |                                                                            |
|-------------------------------------------------------------------|----------------------------------------------------------------------------|
| Radiation                                                         | MoK $\alpha$ ( $\lambda=0.71073$ Å)                                        |
| 2 $\theta$ range [°]                                              | 3.80 to 50.05 (0.84 Å)                                                     |
| Index ranges                                                      | -41 $\leq$ h $\leq$ 41<br>-21 $\leq$ k $\leq$ 21<br>-17 $\leq$ l $\leq$ 17 |
| Reflections collected                                             | 75427                                                                      |
| Independent reflections                                           | 7874<br>$R_{\text{int}} = 0.0422$<br>$R_{\text{sigma}} = 0.0226$           |
| Completeness to $\theta = 25.025^\circ$                           | 99.8 %                                                                     |
| Data / Restraints / Parameters                                    | 7874 / 180 / 559                                                           |
| Absorption correction<br>$T_{\text{min}}/T_{\text{max}}$ (method) | 0.1963 / 0.2602<br>(multi-scan)                                            |
| Goodness-of-fit on $F^2$                                          | 1.354                                                                      |
| Final $R$ indexes<br>[ $I \geq 2\sigma(I)$ ]                      | $R_1 = 0.0598$<br>$wR_2 = 0.1492$                                          |
| Final $R$ indexes<br>[all data]                                   | $R_1 = 0.0673$<br>$wR_2 = 0.1525$                                          |
| Largest peak/hole<br>[eÅ $^{-3}$ ]                                | 1.43/-1.07                                                                 |

## ***o*-(C<sub>2</sub>B<sub>10</sub>H<sub>10</sub>)(SbPh<sub>2</sub>Cl)<sub>2</sub>O [1e]**

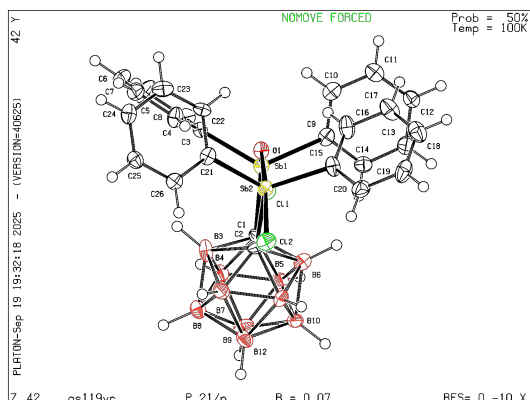

A colourless, plate-shaped crystal was mounted on the goniometer. Data for *o*-(C<sub>2</sub>B<sub>10</sub>H<sub>10</sub>)(SbPh<sub>2</sub>Cl)<sub>2</sub>O was collected from a shock-cooled single crystal at 100(2) K on a Bruker Prospector three-circle diffractometer with a sealed X-ray tube using a Triumph monochromator and a Bruker Apex-II CCD detector. The diffractometer was equipped with an Oxford Cryostream 700 low temperature device and used MoK $\alpha$  radiation ( $\lambda = 0.71073 \text{ \AA}$ ). All data were integrated with SAINT V8.41 and a multi-scan absorption correction using TWINABS Bruker was applied.<sup>[13,14]</sup> The structure was solved by direct methods with SHELXT and refined by full-matrix least-squares methods against  $F^2$  using SHELXL-2019/2.<sup>[15,16]</sup> All non-hydrogen atoms were refined with anisotropic displacement parameters. All C-bound hydrogen atoms were refined isotropic on calculated positions using a riding model with their  $U_{\text{iso}}$  values constrained to 1.5 times the  $U_{\text{eq}}$  of their pivot atoms for terminal sp<sup>3</sup> carbon atoms and 1.2 times for all other carbon atoms. This report and the CIF file were generated using FinalCif.<sup>[17]</sup>

**Table S12.** Crystal data and structure refinement for *o*-(C<sub>2</sub>B<sub>10</sub>H<sub>10</sub>)(SbPh<sub>2</sub>Cl)<sub>2</sub>O

|                                        |                                                                                  |
|----------------------------------------|----------------------------------------------------------------------------------|
| CCDC number                            | 2514936                                                                          |
| Empirical formula                      | C <sub>26</sub> H <sub>30</sub> B <sub>10</sub> Cl <sub>2</sub> OSb <sub>2</sub> |
| Formula weight                         | 781.00                                                                           |
| Temperature [K]                        | 100(2)                                                                           |
| Crystal system                         | monoclinic                                                                       |
| Space group<br>(number)                | <i>P</i> 2 <sub>1</sub> / <i>n</i> (14)                                          |
| <i>a</i> [Å]                           | 12.465(3)                                                                        |
| <i>b</i> [Å]                           | 15.988(3)                                                                        |
| <i>c</i> [Å]                           | 15.958(3)                                                                        |
| α [°]                                  | 90                                                                               |
| β [°]                                  | 101.726(5)                                                                       |
| γ [°]                                  | 90                                                                               |
| Volume [Å <sup>3</sup> ]               | 3114.0(11)                                                                       |
| <i>Z</i>                               | 4                                                                                |
| ρ <sub>calc</sub> [gcm <sup>-3</sup> ] | 1.666                                                                            |
| μ [mm <sup>-1</sup> ]                  | 1.928                                                                            |
| <i>F</i> (000)                         | 1520                                                                             |
| Crystal size [mm <sup>3</sup> ]        | 0.046×0.082×0.121                                                                |
| Crystal colour                         | colourless                                                                       |

|                                                                   |                                                                        |
|-------------------------------------------------------------------|------------------------------------------------------------------------|
| Crystal shape                                                     | plate                                                                  |
| Radiation                                                         | MoK $\alpha$ ( $\lambda=0.71073$ Å)                                    |
| 2 $\theta$ range [°]                                              | 3.64 to 52.78 (0.80 Å)                                                 |
| Index ranges                                                      | -15 $\leq$ h $\leq$ 15<br>0 $\leq$ k $\leq$ 19<br>0 $\leq$ l $\leq$ 19 |
| Reflections collected                                             | 14192                                                                  |
| Independent reflections                                           | 14192<br>$R_{\text{int}} = 0.1336$<br>$R_{\text{sigma}} = 0.1613$      |
| Completeness to $\theta = 25.242^\circ$                           | 100.0 %                                                                |
| Data / Restraints / Parameters                                    | 14192 / 0 / 372                                                        |
| Absorption correction<br>$T_{\text{min}}/T_{\text{max}}$ (method) | 0.0192 / 0.0452<br>(multi-scan)                                        |
| Goodness-of-fit on $F^2$                                          | 1.000                                                                  |
| Final $R$ indexes<br>[ $I \geq 2\sigma(I)$ ]                      | $R_1 = 0.0730$<br>$wR_2 = 0.1135$                                      |
| Final $R$ indexes<br>[all data]                                   | $R_1 = 0.1623$<br>$wR_2 = 0.1404$                                      |
| Largest peak/hole<br>[eÅ $^{-3}$ ]                                | 1.68/-1.19                                                             |

## [Et<sub>3</sub>PO][o-(C<sub>2</sub>B<sub>10</sub>H<sub>10</sub>)(SbPh<sub>4</sub>(diolate))<sub>2</sub>] [2c]

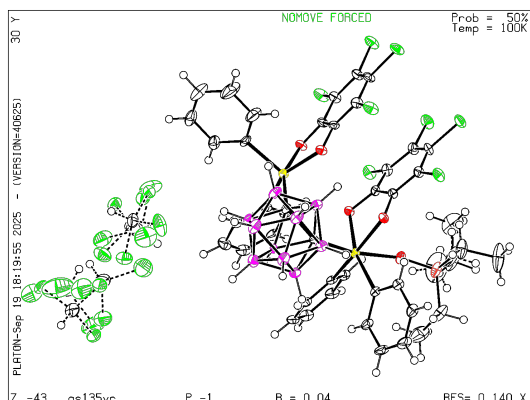

A colourless, prism-shaped crystal was mounted on the goniometer. Data for [Et<sub>3</sub>PO][o-(C<sub>2</sub>B<sub>10</sub>H<sub>10</sub>)(SbPh<sub>4</sub>(diolate))<sub>2</sub>] was collected from a shock-cooled single crystal at 100(2) K on a Bruker Prospector three-circle diffractometer with a sealed X-ray tube using a Triumph monochromator and a Bruker Apex-II CCD detector. The diffractometer was equipped with an Oxford Cryostream 700 low temperature device and used MoK $\alpha$  radiation ( $\lambda = 0.71073 \text{ \AA}$ ). All data were integrated with SAINT V8.41 and a multi-scan absorption correction using SADABS 2016/2 was applied.<sup>[13,14]</sup> The structure was solved by direct methods with SHELXT 2018/2 and refined by full-matrix least-squares methods against  $F^2$  using SHELXL-2019/2.<sup>[15,16]</sup> All non-hydrogen atoms were refined with anisotropic displacement parameters. All C-bound hydrogen atoms were refined isotropic on calculated positions using a riding model with their  $U_{\text{iso}}$  values constrained to 1.5 times the  $U_{\text{eq}}$  of their pivot atoms for terminal sp<sup>3</sup> carbon atoms and 1.2 times for all other carbon atoms. Disordered moieties were refined using bond lengths restraints and displacement parameter restraints. This report and the CIF file were generated using FinalCif.<sup>[17]</sup>

**Table S13.** Crystal data and structure refinement for  $[\text{Et}_3\text{PO}][\text{o}-(\text{C}_2\text{B}_{10}\text{H}_{10})(\text{SbPh}_4(\text{diolate}))_2]$

|                                           |                                                                               |
|-------------------------------------------|-------------------------------------------------------------------------------|
| CCDC number                               | 2514938                                                                       |
| Empirical formula                         | $\text{C}_{46}\text{H}_{47}\text{B}_{10}\text{Cl}_{14}\text{O}_5\text{PSb}_2$ |
| Formula weight                            | 1558.70                                                                       |
| Temperature [K]                           | 100(2)                                                                        |
| Crystal system                            | triclinic                                                                     |
| Space group<br>(number)                   | $P\bar{1}$ (2)                                                                |
| $a$ [Å]                                   | 13.1762(14)                                                                   |
| $b$ [Å]                                   | 13.5391(14)                                                                   |
| $c$ [Å]                                   | 18.6724(19)                                                                   |
| $\alpha$ [°]                              | 71.828(2)                                                                     |
| $\beta$ [°]                               | 74.388(2)                                                                     |
| $\gamma$ [°]                              | 82.052(2)                                                                     |
| Volume [Å <sup>3</sup> ]                  | 3042.8(5)                                                                     |
| $Z$                                       | 2                                                                             |
| $\rho_{\text{calc}}$ [gcm <sup>-3</sup> ] | 1.701                                                                         |
| $\mu$ [mm <sup>-1</sup> ]                 | 1.573                                                                         |
| $F(000)$                                  | 1536                                                                          |
| Crystal size [mm <sup>3</sup> ]           | 0.130×0.147×0.170                                                             |
| Crystal colour                            | colourless                                                                    |

|                                             |                                                                   |
|---------------------------------------------|-------------------------------------------------------------------|
| Crystal shape                               | prism                                                             |
| Radiation                                   | MoK $\alpha$ ( $\lambda=0.71073$ Å)                               |
| 2 $\theta$ range [°]                        | 3.37 to 56.66 (0.75 Å)                                            |
| Index ranges                                | -17 ≤ h ≤ 17<br>-18 ≤ k ≤ 18<br>-23 ≤ l ≤ 24                      |
| Reflections collected                       | 48340                                                             |
| Independent reflections                     | 13847<br>$R_{\text{int}} = 0.0540$<br>$R_{\text{sigma}} = 0.0637$ |
| Completeness to $\theta = 25.242^\circ$     | 99.9 %                                                            |
| Data / Restraints / Parameters              | 13847 / 1099 / 867                                                |
| Absorption correction                       | 0.6632 / 0.7457                                                   |
| T <sub>min</sub> /T <sub>max</sub> (method) | (multi-scan)                                                      |
| Goodness-of-fit on $F^2$                    | 1.070                                                             |
| Final $R$ indexes [ $I \geq 2\sigma(I)$ ]   | $R_1 = 0.0442$<br>$wR_2 = 0.0851$                                 |
| Final $R$ indexes [all data]                | $R_1 = 0.0682$<br>$wR_2 = 0.0922$                                 |
| Largest peak/hole [eÅ <sup>-3</sup> ]       | 1.43/-0.91                                                        |

**[<sup>n</sup>Bu<sub>4</sub>N][μ<sup>2</sup>-F][o-(C<sub>2</sub>B<sub>10</sub>H<sub>10</sub>)<sub>2</sub>(SbPh<sub>2</sub>(diolate))<sub>2</sub>] [1d]**

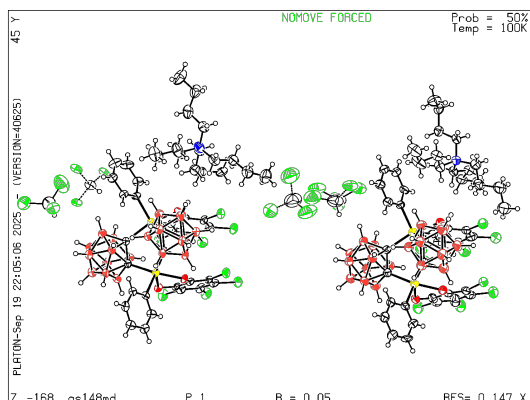

A yellow, prism-shaped crystal was mounted on the goniometer. Data for [<sup>n</sup>Bu<sub>4</sub>N][μ<sup>2</sup>-F][o-(C<sub>2</sub>B<sub>10</sub>H<sub>10</sub>)<sub>2</sub>(SbPh<sub>2</sub>(diolate))<sub>2</sub>] was collected from a shock-cooled single crystal at 100(2) K on a Bruker Prospector three-circle diffractometer with a sealed X-ray tube using a Triumph monochromator and a Bruker Apex-II CCD detector. The diffractometer was equipped with an Oxford Cryostream 700 low temperature device and used MoK<sub>α</sub> radiation (λ = 0.71073 Å). All data were integrated with SAINT V8.41 and a multi-scan absorption correction using SADABS 2016/2 was applied.<sup>[13,14]</sup> The structure was solved by direct methods with SHELXT 2018/2 and refined by full-matrix least-squares methods against *F*<sup>2</sup> using SHELXL-2019/2.<sup>[15,16]</sup> All non-hydrogen atoms were refined with anisotropic displacement parameters. All C-bound hydrogen atoms were refined isotropic on calculated positions using a riding model with their *U*<sub>iso</sub> values constrained to 1.5 times the *U*<sub>eq</sub> of their pivot atoms for terminal sp<sup>3</sup> carbon atoms and 1.2 times for all other carbon atoms. Disordered moieties were refined using bond lengths restraints and displacement parameter restraints. This report and the CIF file were generated using FinalCif.<sup>[17]</sup>

**Table S14.** Crystal data and structure refinement for  $[\text{nBu}_4\text{N}][\mu^2\text{-F}][\text{o}-(\text{C}_2\text{B}_{10}\text{H}_{10})_2(\text{SbPh}_2(\text{diolate}))_2]$

|                                           |                                                                                |
|-------------------------------------------|--------------------------------------------------------------------------------|
| CCDC number                               | 2514942                                                                        |
| Empirical formula                         | $\text{C}_{45}\text{H}_{67}\text{B}_{20}\text{Cl}_{11}\text{FNO}_4\text{Sb}_2$ |
| Formula weight                            | 1554.64                                                                        |
| Temperature [K]                           | 100(2)                                                                         |
| Crystal system                            | triclinic                                                                      |
| Space group (number)                      | $P1$ (1)                                                                       |
| $a$ [Å]                                   | 11.9974(10)                                                                    |
| $b$ [Å]                                   | 12.9551(11)                                                                    |
| $c$ [Å]                                   | 25.121(2)                                                                      |
| $\alpha$ [°]                              | 91.423(2)                                                                      |
| $\beta$ [°]                               | 102.023(2)                                                                     |
| $\gamma$ [°]                              | 116.632(2)                                                                     |
| Volume [Å <sup>3</sup> ]                  | 3382.3(5)                                                                      |
| $Z$                                       | 2                                                                              |
| $\rho_{\text{calc}}$ [gcm <sup>-3</sup> ] | 1.526                                                                          |
| $\mu$ [mm <sup>-1</sup> ]                 | 1.277                                                                          |
| $F(000)$                                  | 1548                                                                           |
| Crystal size [mm <sup>3</sup> ]           | 0.057×0.129×0.283                                                              |
| Crystal colour                            | yellow                                                                         |
| Crystal shape                             | prism                                                                          |

|                                                                   |                                                                            |
|-------------------------------------------------------------------|----------------------------------------------------------------------------|
| Radiation                                                         | MoK $\alpha$ ( $\lambda=0.71073$ Å)                                        |
| 2 $\theta$ range [°]                                              | 1.67 to 50.05 (0.84 Å)                                                     |
| Index ranges                                                      | -14 $\leq$ h $\leq$ 14<br>-15 $\leq$ k $\leq$ 15<br>-29 $\leq$ l $\leq$ 29 |
| Reflections collected                                             | 83200                                                                      |
| Independent reflections                                           | 23932<br>$R_{\text{int}} = 0.0349$<br>$R_{\text{sigma}} = 0.0362$          |
| Completeness to<br>$\theta = 25.026^\circ$                        | 100.0 %                                                                    |
| Data / Restraints /<br>Parameters                                 | 23932 / 1945 / 1624                                                        |
| Absorption correction<br>$T_{\text{min}}/T_{\text{max}}$ (method) | 0.0058 / 0.0183<br>(multi-scan)                                            |
| Goodness-of-fit on $F^2$                                          | 1.145                                                                      |
| Final $R$ indexes<br>[ $I \geq 2\sigma(I)$ ]                      | $R_1 = 0.0543$<br>$wR_2 = 0.1239$                                          |
| Final $R$ indexes<br>[all data]                                   | $R_1 = 0.0620$<br>$wR_2 = 0.1279$                                          |
| Largest peak/hole [ $e\text{Å}^{-3}$ ]                            | 2.40/-1.37                                                                 |
| Flack X parameter                                                 | -0.019(5)                                                                  |

**[<sup>n</sup>Bu<sub>4</sub>N][μ<sup>2</sup>-F][o-(C<sub>2</sub>B<sub>10</sub>H<sub>10</sub>)(SbPh<sub>4</sub>(diolate))<sub>2</sub>] [2d]**

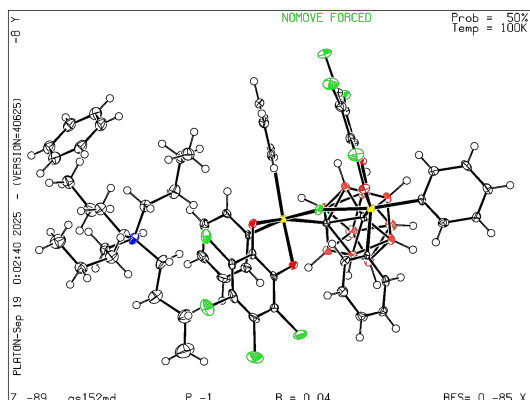

A yellow, block-shaped crystal was mounted on the goniometer. Data for [nBu<sub>4</sub>N][μ<sup>2</sup>-F][o-(C<sub>2</sub>B<sub>10</sub>H<sub>10</sub>)(SbPh<sub>4</sub>(diolate))<sub>2</sub>] was collected from a shock-cooled single crystal at 100(2) K on a Bruker Prospector three-circle diffractometer with a sealed X-ray tube using a Triumph monochromator and a Bruker Apex-II CCD detector. The diffractometer was equipped with an Oxford Cryostream 700 low temperature device and used MoK<sub>α</sub> radiation (λ = 0.71073 Å). All data were integrated with SAINT V8.41 and a multi-scan absorption correction using TWINABS Bruker was applied.<sup>[13,14]</sup> The structure was solved by dual space methods with SHELXD and refined by full-matrix least-squares methods against *F*<sup>2</sup> using SHELXL-2019/2.<sup>[15,16]</sup> All non-hydrogen atoms were refined with anisotropic displacement parameters. All C-bound hydrogen atoms were refined isotropic on calculated positions using a riding model with their *U*<sub>iso</sub> values constrained to 1.5 times the *U*<sub>eq</sub> of their pivot atoms for terminal sp<sup>3</sup> carbon atoms and 1.2 times for all other carbon atoms. This report and the CIF file were generated using FinalCif.<sup>[17]</sup>

**Table S15.** Crystal data and structure refinement for  $[\text{nBu}_4\text{N}][\mu^2\text{-F}][\text{o}-(\text{C}_2\text{B}_{10}\text{H}_{10})(\text{SbPh}_4(\text{diolate}))_2]$

|                                           |                                                                             |
|-------------------------------------------|-----------------------------------------------------------------------------|
| CCDC number                               | 2514939                                                                     |
| Empirical formula                         | $\text{C}_{57}\text{H}_{69}\text{B}_{10}\text{Cl}_8\text{FNO}_4\text{Sb}_2$ |
| Formula weight                            | 1486.33                                                                     |
| Temperature [K]                           | 100(2)                                                                      |
| Crystal system                            | triclinic                                                                   |
| Space group (number)                      | $P\bar{1}$ (2)                                                              |
| $a$ [Å]                                   | 14.6303(17)                                                                 |
| $b$ [Å]                                   | 15.9306(18)                                                                 |
| $c$ [Å]                                   | 16.1327(18)                                                                 |
| $\alpha$ [°]                              | 68.646(2)                                                                   |
| $\beta$ [°]                               | 72.498(2)                                                                   |
| $\gamma$ [°]                              | 68.897(2)                                                                   |
| Volume [Å <sup>3</sup> ]                  | 3204.2(6)                                                                   |
| $Z$                                       | 2                                                                           |
| $\rho_{\text{calc}}$ [gcm <sup>-3</sup> ] | 1.541                                                                       |
| $\mu$ [mm <sup>-1</sup> ]                 | 1.225                                                                       |
| $F(000)$                                  | 1494                                                                        |
| Crystal size [mm <sup>3</sup> ]           | 0.060×0.115×0.270                                                           |
| Crystal colour                            | yellow                                                                      |
| Crystal shape                             | block                                                                       |

|                                                                   |                                                                            |
|-------------------------------------------------------------------|----------------------------------------------------------------------------|
| Radiation                                                         | MoK $\alpha$ ( $\lambda=0.71073$ Å)                                        |
| 2 $\theta$ range [°]                                              | 3.51 to 52.86 (0.80 Å)                                                     |
| Index ranges                                                      | -18 $\leq$ h $\leq$ 18<br>-19 $\leq$ k $\leq$ 19<br>-20 $\leq$ l $\leq$ 20 |
| Reflections collected                                             | 30395                                                                      |
| Independent reflections                                           | 30395<br>$R_{\text{int}} = 0.0505$<br>$R_{\text{sigma}} = 0.0605$          |
| Completeness to<br>$\theta = 25.242^\circ$                        | 98.6 %                                                                     |
| Data / Restraints /<br>Parameters                                 | 30395 / 0 / 753                                                            |
| Absorption correction<br>$T_{\text{min}}/T_{\text{max}}$ (method) | 0.6646 / 0.7454<br>(multi-scan)                                            |
| Goodness-of-fit on $F^2$                                          | 1.028                                                                      |
| Final $R$ indexes<br>[ $I \geq 2\sigma(I)$ ]                      | $R_1 = 0.0386$<br>$wR_2 = 0.0627$                                          |
| Final $R$ indexes<br>[all data]                                   | $R_1 = 0.0610$<br>$wR_2 = 0.0685$                                          |
| Largest peak/hole [ $\text{e}\text{\AA}^{-3}$ ]                   | 0.82/-0.82                                                                 |

## [Et<sub>3</sub>PO][o-(C<sub>2</sub>B<sub>10</sub>H<sub>10</sub>)(SbPh<sub>4</sub>)<sub>2</sub>(diolate)]

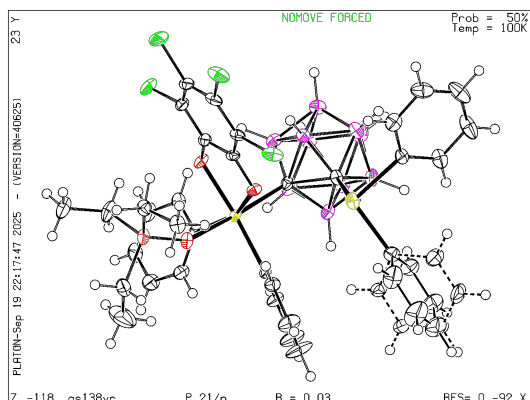

A colourless, prism-shaped crystal was mounted on the goniometer. Data for [Et<sub>3</sub>PO][o-(C<sub>2</sub>B<sub>10</sub>H<sub>10</sub>)(SbPh<sub>4</sub>)<sub>2</sub>(diolate)] was collected from a shock-cooled single crystal at 100(2) K on a Bruker Prospector three-circle diffractometer with a sealed X-ray tube using a Triumph monochromator and a Bruker Apex-II CCD detector. The diffractometer was equipped with an Oxford Cryostream 700 low temperature device and used MoK $\alpha$  radiation ( $\lambda = 0.71073 \text{ \AA}$ ). All data were integrated with SAINT V8.41 and a multi-scan absorption correction using SADABS 2016/2 was applied.<sup>[14,15]</sup> The structure was solved by direct methods with SHELXT 2018/2 and refined by full-matrix least-squares methods against  $F^2$  using SHELXL-2019/2.<sup>[16,17]</sup> All non-hydrogen atoms were refined with anisotropic displacement parameters. All C-bound hydrogen atoms were refined isotropic on calculated positions using a riding model with their  $U_{\text{iso}}$  values constrained to 1.5 times the  $U_{\text{eq}}$  of their pivot atoms for terminal sp<sup>3</sup> carbon atoms and 1.2 times for all other carbon atoms. Disordered moieties were refined using bond lengths restraints and displacement parameter restraints. This report and the CIF file were generated using FinalCif.<sup>[18]</sup>

**Table S16.** Crystal data and structure refinement for  $[\text{Et}_3\text{PO}][\text{o}-(\text{C}_2\text{B}_{10}\text{H}_{10})(\text{SbPh}_4)_2(\text{diolate})]$

|                                           |                                                                            |
|-------------------------------------------|----------------------------------------------------------------------------|
| CCDC number                               | 2514940                                                                    |
| Empirical formula                         | $\text{C}_{38}\text{H}_{45}\text{B}_{10}\text{Cl}_4\text{O}_3\text{PSb}_2$ |
| Formula weight                            | 1074.11                                                                    |
| Temperature [K]                           | 100(2)                                                                     |
| Crystal system                            | monoclinic                                                                 |
| Space group<br>(number)                   | $P2_1/n$ (14)                                                              |
| $a$ [Å]                                   | 14.4191(14)                                                                |
| $b$ [Å]                                   | 19.0361(18)                                                                |
| $c$ [Å]                                   | 16.3885(16)                                                                |
| $\alpha$ [°]                              | 90                                                                         |
| $\beta$ [°]                               | 100.573(2)                                                                 |
| $\gamma$ [°]                              | 90                                                                         |
| Volume [Å <sup>3</sup> ]                  | 4422.0(7)                                                                  |
| $Z$                                       | 4                                                                          |
| $\rho_{\text{calc}}$ [gcm <sup>-3</sup> ] | 1.613                                                                      |
| $\mu$ [mm <sup>-1</sup> ]                 | 1.537                                                                      |
| $F(000)$                                  | 2128                                                                       |
| Crystal size [mm <sup>3</sup> ]           | 0.074×0.087×0.140                                                          |
| Crystal colour                            | colourless                                                                 |

|                                             |                                                                            |
|---------------------------------------------|----------------------------------------------------------------------------|
| Crystal shape                               | prism                                                                      |
| Radiation                                   | MoK $\alpha$ ( $\lambda=0.71073$ Å)                                        |
| 2 $\theta$ range [°]                        | 3.31 to 50.21 (0.84 Å)                                                     |
| Index ranges                                | -17 $\leq$ h $\leq$ 17<br>-22 $\leq$ k $\leq$ 22<br>-19 $\leq$ l $\leq$ 19 |
| Reflections collected                       | 68396                                                                      |
| Independent reflections                     | 7861<br>$R_{\text{int}} = 0.0573$<br>$R_{\text{sigma}} = 0.0318$           |
| Completeness to $\theta = 25.105^\circ$     | 99.6 %                                                                     |
| Data / Restraints / Parameters              | 7861 / 598 / 572                                                           |
| Absorption correction                       | 0.6875 / 0.7452                                                            |
| T <sub>min</sub> /T <sub>max</sub> (method) | (multi-scan)                                                               |
| Goodness-of-fit on $F^2$                    | 1.060                                                                      |
| Final $R$ indexes [ $I \geq 2\sigma(I)$ ]   | $R_1 = 0.0296$<br>$wR_2 = 0.0608$                                          |
| Final $R$ indexes [all data]                | $R_1 = 0.0441$<br>$wR_2 = 0.0653$                                          |
| Largest peak/hole [eÅ <sup>-3</sup> ]       | 0.73/-1.11                                                                 |

## VII. References

- 1) Taylor, W. V.; Cammack, C. X.; Shubert, S. A.; Rose, M. J. Thermoluminescent Antimony-Supported Copper-Iodo Cuboids: Approaching NIR Emission via High Crystallographic Symmetry. *Inorg. Chem.* **2019**, *58* (24), 16330–16345. DOI: 10.1021/acs.inorgchem.9b00229.
- 2) (a) Lee, C.; Yang, W.; Parr, R. G. Development of the Colle-Salvetti Correlation-Energy Formula into a Functional of the Electron Density. *Phys Rev B Condens Matter* **1988**, *37* (2), 785–789. DOI: 10.1103/physrevb.37.785. (b) Becke, A. D. Density-functional Thermochemistry. III. The Role of Exact Exchange. *J. Chem. Phys.* **1993**, *98* (7), 5648–5652. DOI: 10.1063/1.464913.
- 3) (a) Grimme, S. Accurate Description of van Der Waals Complexes by Density Functional Theory Including Empirical Corrections. *J Comput Chem* **2004**, *25* (12), 1463–1473. DOI: 10.1002/jcc.20078. (b) Grimme, S.; Antony, J.; Ehrlich, S.; Krieg, H. A Consistent and Accurate Ab Initio Parametrization of Density Functional Dispersion Correction (DFT-D) for the 94 Elements H-Pu. *J Chem Phys* **2010**, *132* (15), 154104. DOI: 10.1063/1.3382344. (c) Grimme, S. Density Functional Theory with London Dispersion Corrections. *WIREs Computational Molecular Science* **2011**, *1* (2), 211–228. DOI: 10.1002/wcms.30. (d) Ehrlich, S.; Moellmann, J.; Grimme, S. Dispersion-Corrected Density Functional Theory for Aromatic Interactions in Complex Systems. *Acc Chem Res* **2013**, *46* (4), 916–926. DOI: 10.1021/ar3000844.
- 4) (a) T. H. Dunning Jr. and P. J. Hay, in *Modern Theoretical Chemistry*, Ed. H. F. Schaefer III, Vol. 3 (Plenum, New York, **1977**) 1-28. (b) Hay, P. J.; Wadt, W. R. Ab Initio Effective Core Potentials for Molecular Calculations. Potentials for K to Au Including the Outermost Core Orbitals. *J. Chem. Phys.* **1985**, *82* (1), 299–310. DOI: 10.1063/1.448975. (c) P. J. Hay and W. R. Wadt, “Ab initio effective core potentials for molecular calculations – potentials for K to Au including the outermost core orbitals,” *J. Chem. Phys.* **1985**, *82*, 299-310. DOI: 10.1063/1.448975
- 5) (a) Weigend, F.; Ahlrichs, R. Balanced Basis Sets of Split Valence, Triple Zeta Valence and Quadruple Zeta Valence Quality for H to Rn: Design and Assessment of Accuracy. *Phys. Chem. Chem. Phys.* **2005**, *7* (18), 3297–3305. DOI: 10.1039/B508541A. (b) Weigend, F. Accurate Coulomb-Fitting Basis Sets for H to Rn. *Phys. Chem. Chem. Phys.* **2006**, *8* (9), 1057–1065. DOI: 10.1039/B515623H.
- 6) Gaussian 16, Revision C.01, Frisch, M. J.; Trucks, G. W.; Schlegel, H. B.; Scuseria, G. E.; Robb, M. A.; Cheeseman, J. R.; Scalmani, G.; Barone, V.; Petersson, G. A.; Nakatsuji, H.; Li, X.; Caricato, M.; Marenich, A. V.; Bloino, J.; Janesko, B. G.; Gomperts, R.; Mennucci, B.; Hratchian, H. P.; Ortiz, J. V.; Izmaylov, A. F.; Sonnenberg, J. L.; Williams-Young, D.; Ding, F.; Lipparini, F.; Egidi, F.; Goings, J.; Peng, B.; Petrone, A.; Henderson, T.; Ranasinghe, D.; Zakrzewski, V. G.; Gao, J.; Rega, N.; Zheng, G.; Liang, W.; Hada, M.; Ehara, M.; Toyota, K.; Fukuda, R.; Hasegawa, J.; Ishida, M.; Nakajima, T.; Honda, Y.; Kitao, O.; Nakai, H.; Vreven, T.; Throssell, K.; Montgomery, J. A., Jr.; Peralta, J. E.; Ogliaro, F.; Bearpark, M. J.; Heyd, J. J.; Brothers, E. N.; Kudin,

K. N.; Staroverov, V. N.; Keith, T. A.; Kobayashi, R.; Normand, J.; Raghavachari, K.; Rendell, A. P.; Burant, J. C.; Iyengar, S. S.; Tomasi, J.; Cossi, M.; Millam, J. M.; Klene, M.; Adamo, C.; Cammi, R.; Ochterski, J. W.; Martin, R. L.; Morokuma, K.; Farkas, O.; Foresman, J. B.; Fox, D. J. Gaussian, Inc., Wallingford CT, **2016**.

- 7) Legault, C. Y. (**2009**) CYLview, 1.0b, Université de Sherbrooke: Sherbrooke, Canada, <http://www.cylview.org>.
- 8) S. Grimme, "Semiempirical hybrid density functional with perturbative second-order correlation," *J. Chem. Phys.*, **2006**, *124*, 034108. DOI: 10.1063/1.2148954
- 9) Schwabe, T.; Grimme, S. Double-Hybrid Density Functionals with Long-Range Dispersion Corrections: Higher Accuracy and Extended Applicability. *Phys. Chem. Chem. Phys.* **2007**, *9* (26), 3397–3406. DOI: 10.1039/B704725H.
- 10) Erdmann, P.; Leitner, J.; Schwarz, J.; Greb, L. An Extensive Set of Accurate Fluoride Ion Affinities for P-Block Element Lewis Acids and Basic Design Principles for Strong Fluoride Ion Acceptors. *ChemPhysChem* **2020**, *21* (10), 987–994. DOI: 10.1002/cphc.202000244.
- 11)(a) Raghavachari, K.; Trucks, G. W.; Pople, J. A.; Head-Gordon, M. A Fifth-Order Perturbation Comparison of Electron Correlation Theories. *Chemical Physics Letters* **1989**, *157* (6), 479–483. DOI: 10.1016/S0009-2614(89)87395-6. (b) Scuseria, G. E.; Janssen, C. L.; Schaefer, H. F. An Efficient Reformulation of the Closed-Shell Coupled Cluster Single and Double Excitation (CCSD) Equations. *The Journal of Chemical Physics* **1988**, *89* (12), 7382–7387. DOI: 10.1063/1.455269. (c) Purvis, G. D., III; Bartlett, R. J. A Full Coupled-cluster Singles and Doubles Model: The Inclusion of Disconnected Triples. *J. Chem. Phys.* **1982**, *76* (4), 1910–1918. DOI: 10.1063/1.443164.
- 12) (a) Dunning, T. H., Jr. Gaussian Basis Sets for Use in Correlated Molecular Calculations. I. The Atoms Boron through Neon and Hydrogen. *J. Chem. Phys.* **1989**, *90* (2), 1007–1023. DOI: 10.1063/1.456153. (b) Kendall, R. A.; Dunning, T. H., Jr.; Harrison, R. J. Electron Affinities of the First-row Atoms Revisited. Systematic Basis Sets and Wave Functions. *J. Chem. Phys.* **1992**, *96* (9), 6796–6806. DOI: 10.1063/1.462569. (c) Woon, D. E.; Dunning, T. H., Jr. Gaussian Basis Sets for Use in Correlated Molecular Calculations. III. The Atoms Aluminum through Argon. *J. Chem. Phys.* **1993**, *98* (2), 1358–1371. DOI: 10.1063/1.464303.
- 13) Phillips, K. L.; Sandler, S. I.; Chiu, P. C. A Method to Calculate the One-Electron Reduction Potentials for Nitroaromatic Compounds Based on Gas-Phase Quantum Mechanics. *Journal of Computational Chemistry* **2010**, *32* (2), 226–239.
- 14) Bruker, *SAINT*, V8.41, Bruker AXS Inc., Madison, Wisconsin, USA.

- 15) L. Krause, R. Herbst-Irmer, G. M. Sheldrick, D. Stalke, *J. Appl. Cryst.* **2015**, *48*, 3–10, DOI:10.1107/S1600576714022985.
- 16) Sheldrick, G. M. Crystal Structure Refinement with SHELXL. *Acta Cryst.* **2015**, A71 (Pt 1), 3–8, DOI:10.1107/S2053273314026370.
- 17) Sheldrick, G. M. Crystal Structure Refinement with SHELXL. *Acta Cryst.* **2015**, C71 (Pt 1), 3–8, doi:10.1107/S2053229614024218.
- 18) D. Kratzert, *FinalCif*, V154, <https://dkratzert.de/finalcif.html>.
